# Supplementary material
Source: PubMed Central journal article supplement (PMC6838671)
Supplement: mmc1.pdf [file mmc1.pdf]

# THE LANCET Oncology

## Supplementary appendix

This appendix formed part of the original submission and has been peer reviewed. We post it as supplied by the authors.

Supplement to: Arnold M, Rutherford MJ, Bardot A, et al. Progress in cancer survival, mortality, and incidence in seven high-income countries 1995–2014 (ICBP SURVMARK-2): a population-based study. *Lancet Oncol* 2019; published online Sept 11. [http://dx.doi.org/10.1016/S1470-2045\(19\)30456-5](http://dx.doi.org/10.1016/S1470-2045(19)30456-5).

## SUPPLEMENTARY APPENDIX:

### Progress in cancer survival in seven high-income countries 1995-2014

#### (ICBP SURVMARK-2): a population-based study

#### Table of Contents

|                                                                                                                                                                     |    |
|---------------------------------------------------------------------------------------------------------------------------------------------------------------------|----|
| Investigator Lists.....                                                                                                                                             | 3  |
| ICBP SurvMark-2 Local Leads .....                                                                                                                                   | 3  |
| ICBP SurvMark-2 Academic Reference Group .....                                                                                                                      | 5  |
| ICBP Clinical Leads .....                                                                                                                                           | 5  |
| ICBP Clinical Committee – Lung.....                                                                                                                                 | 5  |
| ICBP Clinical Committee – Upper GI.....                                                                                                                             | 6  |
| ICBP Clinical Committee – Lower GI.....                                                                                                                             | 6  |
| ICBP Clinical Committee – Liver & Pancreas .....                                                                                                                    | 7  |
| ICBP Clinical Committee – Ovarian .....                                                                                                                             | 7  |
| ICBP Clinical Committee – Primary Care.....                                                                                                                         | 8  |
| ICBP Programme Board .....                                                                                                                                          | 9  |
| Table S1. Age-standardized 1-year net survival (in %) and 95% confidence intervals by cancer site, country and period of diagnosis.....                             | 11 |
| Table S2. Age-standardized 1-year net survival (in %) and 95% confidence intervals by cancer site, country and period of diagnosis in patients aged <75 years ..... | 13 |
| Table S3. Age-standardized 1-year net survival (in %) and 95% confidence intervals by cancer site, country and period of diagnosis in patients aged 75+ years ..... | 15 |
| Table S4. Age-standardized 1-year net survival (in %) and 95% confidence intervals by cancer site, jurisdiction and period of diagnosis.....                        | 17 |
| Table S5. Age-standardized 5-year net survival (in %) and 95% confidence intervals by cancer site, jurisdiction and period of diagnosis.....                        | 20 |
| Table S6. Age-standardized 1-year net survival (in %) and 95% confidence intervals by cancer site, country and period of diagnosis, including DCO cases.....        | 23 |
| Table S7. Age-standardized 5-year net survival (in %) and 95% confidence intervals by cancer site, country and period of diagnosis, including DCO cases.....        | 24 |
| Figure S1. Overall flow of data, processing steps and exclusions in SURVMARK-2.....                                                                                 | 25 |
| Figure S2. Case distribution by cancer site, age group and country in patients diagnosed 2010-2014 .....                                                            | 26 |
| Figure S3. Age-standardized 5-year net survival by site, country* and period of diagnosis in patients aged below 75 years diagnosed 1995-2014.....                  | 27 |

|                                                                                                                                                                                                            |    |
|------------------------------------------------------------------------------------------------------------------------------------------------------------------------------------------------------------|----|
| Figure S4. 5-year net survival by site, country* and period of diagnosis in patients aged 75 years and above diagnosed 1995-2014 .....                                                                     | 28 |
| Figure S5. Changes in age-standardised 5-year net survival, mortality and incidence for lung cancer, by sex (comparing 2010-2014 to 1995-1999) ( <i>circles=jurisdictions; triangles=countries</i> ) ..... | 29 |
| Figure S6A. Annual trends in age-standardised incidence and mortality rates and in 5-year age-standardized net survival from oesophageal cancer by country 1995-2014 .....                                 | 30 |
| Figure S6B. Annual trends in age-standardised incidence and mortality rates and in 5-year age-standardized net survival from stomach cancer by country 1995-2014.....                                      | 31 |
| Figure S6C. Annual trends in age-standardised incidence and mortality rates and in 5-year age-standardized net survival from colon cancer by country 1995-2014 .....                                       | 32 |
| Figure S6D. Annual trends in age-standardised incidence and mortality rates and in 5-year age-standardized net survival from rectal cancer by country 1995-2014 .....                                      | 33 |
| Figure S6E. Annual trends in age-standardised incidence and mortality rates and in 5-year age-standardized net survival from pancreatic cancer by country 1995-2014.....                                   | 34 |
| Figure S6F. Annual trends in age-standardised incidence and mortality rates and in 5-year age-standardized net survival from lung cancer by country 1995-2014.....                                         | 35 |
| Figure S6G. Annual trends in age-standardised incidence and mortality rates and in 5-year age-standardized net survival from ovarian cancer by country 1995-2014.....                                      | 36 |

## *Investigator Lists*

### *ICBP SurvMark-2 Local Leads*

Al Artaman, CancerCare Manitoba, Winnipeg, Manitoba, Canada;

Alana Little, Cancer Institute NSW, Alexandria, New South Wales, Australia;

Andy Deas, Information Services Division, NHS National Services, Edinburgh, Scotland, United Kingdom;

Angela Eckstrand, Alberta Health Services, Edmonton, Alberta, Canada;

Anna Gavin, Northern Ireland Cancer Registry, Queen's University Belfast, Belfast, Northern Ireland, United Kingdom;

Bin Zhang, Government of New Brunswick, Fredericton, New Brunswick, Canada;

Bjørn Møller, Cancer Registry of Norway (Kreftregisteret), Oslo, Norway;

Carol McClure, Government of Prince Edward Island, Charlottetown, Prince Edward Island, Canada;

Ceri White, Welsh Cancer Intelligence & Surveillance Unit, Public Health Wales, Cardiff, Wales, United Kingdom;

Christine Bertrand, Government of Quebec, Montreal, Quebec, Canada;

Christopher Jackson, Cancer Society of New Zealand, Wellington, New Zealand;

Cindy Stock, BC Cancer, Vancouver, British Columbia, Canada;

Claire Austin, Ministry of Health, New Zealand;

David Gavin, The BC Cancer Research Centre, Vancouver, British Columbia, Canada;

David H Brewster, Centre for Population Health Sciences, Edinburgh University, Edinburgh, Scotland, United Kingdom;

David S Morrison, Scottish Cancer Registry, University of Glasgow, Scotland;

David Ransom, Department of Health, Perth, Western Australia, Australia;

Deirdre Fitzpatrick, Northern Ireland Cancer Registry, Queen's University Belfast, Belfast, Northern Ireland, United Kingdom;

Donna Turner, CancerCare Manitoba, Winnipeg, Manitoba, Canada;

Dyfed Huws, Welsh Cancer Intelligence & Surveillance Unit, Public Health Wales, Cardiff, Wales, United Kingdom;

Eshwar Kumar, Government of New Brunswick, Fredericton, New Brunswick, Canada;

Farah McCrate, Eastern Health, St. John's, Newfoundland and Labrador, Canada;

Gail Noonan, CancerCare Manitoba, Winnipeg, Manitoba, Canada;

Geoff Porter, Canadian Partnership Against Cancer, Toronto, Ontario, Canada;

Gerda Engholm, The Danish Cancer Society (Kræftens Bekæmpelse), Copenhagen, Denmark;

Gina Lockwood, Canadian Partnership Against Cancer, Toronto, Ontario, Canada;

Grace Musto, CancerCare Manitoba, Winnipeg, Manitoba, Canada;

Grlica Bolesnikov, Government of New Brunswick, Fredericton, New Brunswick, Canada;

Guillaume Ruel, Government of Quebec, Montreal, Quebec, Canada;

Hanna Tervonen, Cancer Institute NSW, Alexandria, New South Wales, Australia;

Hazem Abd Elkader, Cancer Society of New Zealand, Wellington, New Zealand;

Heather Stuart-Panko, Saskatchewan Cancer Agency, Regina, Saskatchewan, Canada;

Helen Farrugia, Cancer Council Victoria, Melbourne, Victoria, Australia;

Janet Warlow, Welsh Cancer Intelligence & Surveillance Unit, Public Health Wales, Cardiff, Wales, United Kingdom;

Jason Poole, Public Health England, London, England, United Kingdom;

Jes Søgaaard, The Danish Cancer Society (Kræftens Bekæmpelse), Copenhagen, Denmark;

Jingyu Bu, Alberta Health Services, Edmonton, Alberta, Canada;

John Dowling, Department of Health, Perth, Western Australia, Australia;

John Spinelli, The BC Cancer Research Centre, Vancouver, British Columbia, Canada;

Kim Vriends, Government of Prince Edward Island, Charlottetown, Prince Edward Island, Canada;

Lorraine Shack, Alberta Health Services, Edmonton, Alberta, Canada;

Louise Sandford, Cancer Society of New Zealand, Wellington, New Zealand;

Marianne Brenn Jerm, Cancer Registry of Norway (Kreftregisteret), Oslo, Norway

Mary Jane King, Cancer Care Ontario, Toronto, Ontario, Canada;

Maureen MacIntyre, Nova Scotia Health Authority Cancer Care Program, Halifax, Nova Scotia, Canada;

Nathalie St-Jacques, Nova Scotia Health Authority Cancer Care Program, Halifax, Nova Scotia, Canada;

Nicole Mittmann, Cancer Care Ontario, Toronto, Ontario, Canada;

Paul Walsh, National Cancer Registry Ireland, Cork, Ireland;

Prithwish De, Cancer Care Ontario, Toronto, Ontario, Canada;

Raman Agnihotram, McGill University Health Centre, Montreal, Quebec, Canada;

Richard Walton, Cancer Institute NSW, Alexandria, New South Wales, Australia;

Richard Trevithick, Department of Health, Perth, Western Australia, Australia;

Rory Carle, Department of Health, Perth, Western Australia, Australia;

Ryan Woods, BC Cancer, Vancouver, British Columbia, Canada;

Sally Vernon, Public Health England, London, England, United Kingdom;

Serena Kozie, Saskatchewan Cancer Agency, Regina, Saskatchewan, Canada;  
Susan Ryan, Eastern Health, St. John's, Newfoundland and Labrador, Canada;  
Suzanne Leonfellner, Government of New Brunswick, Fredericton, New Brunswick, Canada;  
Vicky Thursfield, Cancer Council Victoria, Melbourne, Victoria, Australia;

***ICBP SurvMark-2 Academic Reference Group***

Diana Sarfati, University of Otago, Dunedin, New Zealand;  
Dianne O'Connell, Cancer Council New South Wales, Sydney, New South Wales, Australia;  
Michael Eden, Public Health England, London, United Kingdom;  
Sabine Siesling, the Netherlands Comprehensive Cancer Organisation (IKNL), Utrecht, The Netherlands and University of Twente, Enschede, The Netherlands.

***ICBP Clinical Leads***

Allan Spiegelman, UNSW St Vincent's Hospital Clinical School, Sydney, Australia;  
Christian Finley, McMaster University, Toronto, Ontario, Canada;  
John Butler, The Royal Marsden NHS Foundation Trust, London, United Kingdom;  
Naureen Starling, The Royal Marsden NHS Foundation Trust, London, United Kingdom;  
Piers Gatenby, Royal Surrey County Hospital Foundation Trust, Guildford, United Kingdom;

***ICBP Clinical Committee – Lung***

Anur Guhan, The Ayr Hospital, Scotland, United Kingdom;  
Christian Finley, McMaster University, Canadian Association of Thoracic Surgeons, Canada;  
Brian McCaughan, University of Sydney, Australia;  
David Baldwin, University of Nottingham, United Kingdom;  
Erik Jakobsen, Odense University Hospital, Denmark;  
Ian Williamson, Aneurin Bevan University Hospital, Wales, United Kingdom;  
Jason Lester, Velindre Cancer Centre, Wales, United Kingdom;  
Jonathan McAleese, Belfast City Hospital, Northern Ireland, United Kingdom;  
Karl Kolbeck, Karolinska University Hospital, Sweden;

Mick Peake, Public Health England, United Kingdom;

Odd Terje Brustugun, Oslo University Hospital, Norway;

Paul Dawkins, Middlemore Hospital, New Zealand;

Wendy Anderson, Northern Health and Social Care Trust, Northern Ireland, United Kingdom;

***ICBP Clinical Committee – Upper GI***

Alan Christie, Edinburgh Cancer Centre, Scotland, United Kingdom;

Andrew Kennedy, Association of Laparoscopic Surgeons, Ireland;

Ashley Roberts, Cardiff & Vale University Health Board, Wales, United Kingdom;

Asif Chaudry, The Royal Marsden, London, United Kingdom;

Carys Morgan, Velindre Cancer Centre, Wales, United Kingdom;

Christian Finley, McMaster University, Canada;

David Ransom, Fiona Stanley Hospital, Western Australia;

Geoff Porter, Dalhousie University, Nova Scotia, Canada;

John Reynolds, St James Hospital and Trinity College, Dublin, Ireland;

John Windsor, University of Auckland and Auckland City Hospital, New Zealand;

John Zalberg, School of Public Health and Preventive Medicine at Monash University, Australia;

Natalie Coburn, Odette Cancer Centre, Canada;

Naureen Starling, The Royal Marsden, London, United Kingdom;

Neil Merrett, University of Western Sydney and South Western Sydney Local Health District, Australia;

Paulose George, Wrexham Maelor Hospital, Wales, United Kingdom;

Piers Gatenby, Royal Surrey County Hospital, Surrey, United Kingdom;

Tom Crosby, Velindre Cancer Centre and South Wales Cancer Network, Wales, United Kingdom;

Wyn Lewis, Cardiff and Vale University Health Board, Wales, United Kingdom;

***ICBP Clinical Committee – Lower GI***

Allan Spigelman, St Vincent's Hospital Clinical School, Sydney, Australia;

Annika Sjovall, Karolinska University Hospital, Sweden;

Christopher Booth, Queen's University, Kingston, Canada

Cindy Chew, Hairmyres University Hospital and University of Glasgow, Scotland, United Kingdom;

Geoff Porter, Dalhousie University, Nova Scotia, Canada;  
Jason Park, St Boniface General Hospital and CancerCare Manitoba, Manitoba, Canada;  
John Butler, The Royal Marsden, London, United Kingdom;  
Marcia Hall, Mount Vernon Cancer Centre, Rickmansworth, United Kingdom;  
Marianne Gronlie Guren, Oslo University Hospital, Norway;  
Mark Robinson, Aneurin Bevan University Health Board, Wales, United Kingdom;  
Mary Theophilus, Royal Perth Hospital, SJG Midland Public and Private Hospitals, Australia;  
Nancy Baxter, St Michael's Hospital and University of Toronto, Canada;  
Paulose George, Wrexham Maelor Hospital, Wales, United Kingdom;  
Rachel Hargest, University Hospital of Wales, Wales, United Kingdom;  
Richard Adams, Cardiff University and Velindre Cancer Centre, Wales, United Kingdom;  
Robert Bleehen, Cardiff & Vale University Health Board, Wales, United Kingdom;  
Winson Cheung, British Columbia Cancer Agency and University of British Columbia, Canada;

***ICBP Clinical Committee – Liver & Pancreas***

Alan Christie, Edinburgh Cancer Centre, Scotland, United Kingdom;  
Cindy Chew, Hairmyres University Hospital and University of Glasgow, Scotland, United Kingdom;  
Elijah Dixon, University of Calgary, Canada;  
Geoff Porter, Dalhousie University, Nova Scotia, Canada;  
John Butler, The Royal Marsden, London, United Kingdom;  
Justin Geoghegan, St Vincent's Private Hospital, Ireland;  
Keith Roberts, University Hospitals Birmingham NHS Foundation Trust and University of Birmingham, United Kingdom;  
Kristoffer Lassen, Oslo University Hospital, Sweden;  
Nagappan Kumar, Cardiff & Vale University Health Board, Wales, United Kingdom;  
Natalie Coburn, Odette Cancer Centre, Canada;  
Naureen Starling, The Royal Marsden, London, United Kingdom;  
Neil Merrett, South Western Sydney Local Health District, Australia;

***ICBP Clinical Committee – Ovarian***



*(\*also Module 7 committee members)*

Alon Altman\*, University of Manitoba, Canada;

Andy Nordin, East Kent Gynaecological Oncology Centre, Kent, United Kingdom;

Charlie Gourley, The University of Edinburgh, Scotland, United Kingdom

Claus Hoegdall\*, University of Copenhagen, Denmark;

Dearbhaile O'Donnell, St James Hospital, Dublin, Ireland;

Gregg Nelson\*, Tom Baker Oncology Centre, Alberta, Canada

Gunnar Kristensen, Norwegian Radium Hospital, Norway;

Iain McNeish, Beatson West of Scotland Cancer Centre and University of Glasgow, Scotland, UK;

James Bentley\*, Dalhousie University, Nova Scotia, Canada;

Jason Tan, Western Australia Cancer & Palliative Care Network, Australia;

John Butler, The Royal Marsden, London, United Kingdom;

John Price, Belfast Trust, Northern Ireland, United Kingdom

Louise Hanna, Velindre Cancer Centre, Cardiff, Wales, United Kingdom;

Marcia Hall, Mount Vernon Cancer Centre, Rickmansworth, United Kingdom;

Michael Fung Kee Fung, Ottawa Regional Cancer Programme & Ottawa Hospital, Canada;

Neville Hacker, Royal Hospital for Women and South Western Sydney Local Health District, Australia;

Orla McNally\*, Royal Women's Hospital, Melbourne, Australia;

Pernille Jensen, Odense University Hospital, Denmark;

Peter Sykes, University of Otago, Christchurch, New Zealand;

Robert Bleehen, Cardiff & Vale University Health Board, Wales, UK;

Russell Hogg\*, The University of Sydney, Australia;

Scott Fegan, Royal Infirmary of Edinburgh, Scotland, United Kingdom;

#### ***ICBP Clinical Committee – Primary Care***

Anat Jani, Nuffield Department of Primary Care Health Sciences, Oxford, United Kingdom;

Brian Nicholson, Nuffield Department of Primary Care Health Sciences, Oxford, United Kingdom;

Clifford Jones, All Wales GP Lead, South Wales Valleys, Wales, United Kingdom;

David Weller, University of Edinburgh, Scotland, United Kingdom;

Fiona Walter, University of Cambridge, Cambridge, United Kingdom;

Hans Thulesius, Lund University, Sweden;

Jon Emery, University of Melbourne and Western Health, Australia;

Ken O'Neill, West of Scotland Primary Care Cancer Group, Glasgow, Scotland, UK;

Lance Saker, Camden Clinical Commissioning Group, London, United Kingdom;

Peter Vedsted, Aarhus University, Denmark;

Richard Neal, Leeds University, Leeds, United Kingdom;

Richard Roope, Royal College of General Practitioners and Cancer Research UK, London, UK;

Ross Lawrenson, University of Waikato, New Zealand;

Susanna Hill, University of Exeter Medical School, Exeter, United Kingdom;

Yoryos Lyratzopoulos, University College London, London, United Kingdom;

*ICBP Clinical Committee – Diagnostics & Pathology:*

Cindy Chew, Hairmyres University Hospital and University of Glasgow, Scotland, United Kingdom;

John Srigley, Trillium Health Partners, Ontario, Canada;

Kate Gower-Thomas, Cwn Taf Health Board, Wales, United Kingdom;

Mark Robinson, Aneurin Bevan University Health Board, Wales, United Kingdom;

Michael Eden, Cambridge University Hospitals NHS Trust, Cambridge, United Kingdom;

Robert Bleehen, Cardiff & Vale University Health Board, Wales, United Kingdom;

Shahid Rasul, NHS Ayrshire & Arran, Scotland, United Kingdom;

***ICBP Programme Board***

Aileen Keel, Scottish Government, Edinburgh, Scotland, UK;

Anna Gavin, Queen's University Belfast, Belfast, Northern Ireland, United Kingdom;

David Fitzgerald, National Cancer Programme Director, NHS England, England, United Kingdom;

Christopher Jackson, Cancer Society of New Zealand, Wellington, New Zealand;

Conan Donnelly, National Cancer Registry Ireland, Cork, Ireland;

David Currow, Cancer Institute New South Wales, Sydney, New South Wales, Australia;

David Ransom, Department of Health, Western Australia, Perth, Western Australia, Australia;

Gareth Davies, Wales Cancer Network, Cardiff, Wales, United Kingdom;

Geoff Porter, Canadian Partnership Against Cancer, Toronto, Ontario, Canada;

Heather Bryant, Canadian Partnership Against Cancer, Toronto, Ontario, Canada;

Linda Aagaard Thomsen, Danish Cancer Society, Copenhagen, Denmark;  
Kathryn Whitfield, Department of Human Services, Melbourne, Victoria, Australia;  
Mike Kernaghan, Cancer Society of New Zealand, Wellington, New Zealand;  
Nicole Mittmann, Cancer Care Ontario, Toronto, Ontario, Canada;  
Ole Alexander Opdalshei, Norwegian Cancer Society, Oslo, Norway;  
Robert Thomas, University of Melbourne, Melbourne, Victoria, Australia;  
Sara Hiom, Cancer Research UK, England, United Kingdom;  
Violet Platt, Department of Health, Western Australia, Perth, Western Australia, Australia;

**Table S1. Age-standardized 1-year net survival (in %) and 95% confidence intervals by cancer site, country and period of diagnosis**

|                   | Australia <sup>†</sup> |             | Canada <sup>‡</sup> |             | Denmark |             | Ireland <sup>§</sup> |             | New Zealand |             | Norway |             | UK   |             |
|-------------------|------------------------|-------------|---------------------|-------------|---------|-------------|----------------------|-------------|-------------|-------------|--------|-------------|------|-------------|
| <b>Oesophagus</b> |                        |             |                     |             |         |             |                      |             |             |             |        |             |      |             |
| 1995-1999         | 42.6                   | (40.8-44.4) | 38.4                | (36.9-39.8) | 27.1    | (24.7-29.4) | 30.8                 | (28.3-33.3) | 29.5        | (26.3-32.7) | 27.9   | (24.6-31.3) | 29.8 | (29.3-30.4) |
| 2000-2004         | 43.7                   | (42.0-45.4) | 39.7                | (38.3-41.1) | 29.6    | (27.4-31.8) | 36.6                 | (34.1-39.1) | 35.0        | (31.9-38.1) | 33.5   | (30.1-36.9) | 36.5 | (35.9-37.0) |
| 2005-2009         | 47.5                   | (45.9-49.2) | 40.7                | (39.4-42.0) | 33.6    | (31.4-35.9) | 43.5                 | (41.1-45.8) | 40.1        | (37.1-43.0) | 41.0   | (37.8-44.3) | 41.4 | (40.8-41.9) |
| 2010-2014         | 52.0                   | (49.7-54.2) | 43.5                | (42.0-45.0) | 44.4    | (41.4-47.4) | 49.9                 | (46.6-53.2) | 44.1        | (40.8-47.3) | 47.3   | (43.8-50.6) | 46.4 | (45.8-47.0) |
| abs change*       | 9.4                    |             | 5.1                 |             | 17.3    |             | 19.1                 |             | 14.6        |             | 19.4   |             | 16.6 |             |
| <b>Stomach</b>    |                        |             |                     |             |         |             |                      |             |             |             |        |             |      |             |
| 1995-1999         | 50.5                   | (49.2-51.7) | 45.1                | (44.1-46.1) | 36.6    | (34.6-38.5) | 33.3                 | (31.3-35.4) | 40.0        | (37.8-42.3) | 42.7   | (40.8-44.7) | 34.7 | (34.2-35.2) |
| 2000-2004         | 52.9                   | (51.6-54.1) | 47.2                | (46.2-48.2) | 37.7    | (35.7-39.7) | 38.3                 | (36.2-40.5) | 42.4        | (40.1-44.7) | 47.3   | (45.2-49.3) | 39.3 | (38.7-39.8) |
| 2005-2009         | 55.3                   | (54.0-56.5) | 49.4                | (48.4-50.4) | 43.6    | (41.6-45.5) | 47.2                 | (45.1-49.3) | 45.9        | (43.5-48.2) | 50.9   | (48.8-53.1) | 43.5 | (42.9-44.0) |
| 2010-2014         | 59.4                   | (57.7-61.0) | 52.6                | (51.4-53.8) | 52.5    | (50.1-54.9) | 52.3                 | (49.5-55.0) | 49.0        | (46.2-51.7) | 53.5   | (50.9-56.0) | 46.8 | (46.1-47.5) |
| abs change*       | 8.9                    |             | 7.5                 |             | 15.9    |             | 19.0                 |             | 9.0         |             | 10.8   |             | 12.1 |             |
| <b>Colon</b>      |                        |             |                     |             |         |             |                      |             |             |             |        |             |      |             |
| 1995-1999         | 78.9                   | (78.4-79.4) | 77.6                | (77.2-78.0) | 70.9    | (69.9-71.8) | 70.9                 | (69.7-72.1) | 76.4        | (75.4-77.3) | 76.3   | (75.4-77.2) | 67.6 | (67.4-67.9) |
| 2000-2004         | 81.8                   | (81.4-82.3) | 80.3                | (80.0-80.7) | 72.9    | (72.0-73.8) | 72.2                 | (71.0-73.3) | 78.2        | (77.2-79.0) | 77.3   | (76.5-78.2) | 71.0 | (70.7-71.2) |
| 2005-2009         | 84.6                   | (84.2-85.0) | 82.6                | (82.3-83.0) | 75.9    | (75.1-76.7) | 78.3                 | (77.3-79.2) | 79.1        | (78.3-80.0) | 80.1   | (79.3-80.9) | 74.0 | (73.8-74.3) |
| 2010-2014         | 87.0                   | (86.5-87.5) | 83.4                | (83.0-83.8) | 82.8    | (82.0-83.6) | 80.8                 | (79.5-82.0) | 80.8        | (79.9-81.8) | 82.6   | (81.8-83.4) | 77.0 | (76.7-77.3) |
| abs change*       | 8.1                    |             | 5.8                 |             | 11.9    |             | 9.9                  |             | 4.4         |             | 6.3    |             | 9.4  |             |
| <b>Rectum</b>     |                        |             |                     |             |         |             |                      |             |             |             |        |             |      |             |
| 1995-1999         | 82.6                   | (81.7-83.4) | 83.2                | (82.5-83.9) | 75.6    | (74.3-76.8) | 73.5                 | (71.6-75.3) | 79.6        | (77.9-81.1) | 81.1   | (79.8-82.3) | 73.0 | (72.6-73.4) |
| 2000-2004         | 85.8                   | (85.1-86.5) | 84.8                | (84.2-85.4) | 79.1    | (77.9-80.2) | 75.9                 | (74.1-77.5) | 82.5        | (81.0-83.9) | 82.7   | (81.6-83.8) | 77.3 | (76.9-77.7) |
| 2005-2009         | 87.9                   | (87.3-88.5) | 86.3                | (85.7-86.8) | 82.6    | (81.6-83.6) | 81.6                 | (80.1-83.0) | 83.9        | (82.5-85.1) | 86.0   | (85.0-87.0) | 80.5 | (80.2-80.9) |
| 2010-2014         | 89.6                   | (88.7-90.4) | 86.6                | (85.9-87.2) | 87.6    | (86.6-88.5) | 86.7                 | (84.7-88.4) | 85.9        | (84.5-87.3) | 89.1   | (88.0-90.2) | 84.8 | (84.4-85.2) |
| abs change*       | 7.0                    |             | 3.4                 |             | 12.0    |             | 13.2                 |             | 6.3         |             | 8.0    |             | 11.8 |             |
| <b>Pancreas</b>   |                        |             |                     |             |         |             |                      |             |             |             |        |             |      |             |
| 1995-1999         | 21.4                   | (20.2-22.6) | 20.1                | (19.3-21.0) | 14.4    | (13.1-15.8) | 13.7                 | (11.8-15.6) | 19.5        | (17.4-21.6) | 15.9   | (14.3-17.5) | 13.7 | (13.3-14.2) |
| 2000-2004         | 26.6                   | (25.4-27.7) | 23.7                | (22.9-24.6) | 17.5    | (16.3-18.9) | 17.6                 | (15.7-19.7) | 19.2        | (17.2-21.3) | 18.9   | (17.3-20.5) | 16.5 | (16.1-17.0) |
| 2005-2009         | 29.9                   | (28.8-30.9) | 26.6                | (25.8-27.4) | 21.9    | (20.5-23.2) | 23.1                 | (21.2-25.1) | 20.4        | (18.6-22.3) | 25.5   | (23.8-27.2) | 21.2 | (20.7-21.6) |
| 2010-2014         | 40.1                   | (38.6-41.5) | 31.4                | (30.5-32.3) | 31.1    | (29.3-32.8) | 31.4                 | (28.4-34.4) | 24.8        | (22.7-27.0) | 30.5   | (28.5-32.4) | 26.3 | (25.7-26.8) |
| abs change*       | 18.7                   |             | 11.3                |             | 16.7    |             | 17.7                 |             | 5.3         |             | 14.6   |             | 12.6 |             |
| <b>Lung</b>       |                        |             |                     |             |         |             |                      |             |             |             |        |             |      |             |
| 1995-1999         | 37.8                   | (37.2-38.5) | 38.3                | (37.9-38.7) | 27.5    | (26.7-28.2) | 25.5                 | (24.4-26.6) | 30.7        | (29.5-31.8) | 31.6   | (30.6-32.6) | 24.2 | (23.9-24.4) |
| 2000-2004         | 40.5                   | (39.9-41.1) | 39.9                | (39.5-40.3) | 33.4    | (32.7-34.2) | 28.2                 | (27.2-29.3) | 31.7        | (30.7-32.8) | 33.7   | (32.7-34.6) | 28.0 | (27.7-28.2) |
| 2005-2009         | 43.8                   | (43.2-44.4) | 42.3                | (41.9-42.7) | 36.4    | (35.7-37.2) | 34.5                 | (33.4-35.5) | 33.2        | (32.2-34.3) | 40.3   | (39.4-41.3) | 31.5 | (31.3-31.8) |
| 2010-2014         | 48.9                   | (48.1-49.7) | 47.0                | (46.5-47.4) | 46.2    | (45.3-47.2) | 45.2                 | (43.8-46.6) | 39.9        | (38.6-41.1) | 46.7   | (45.6-47.8) | 38.9 | (38.6-39.2) |
| abs change*       | 11.1                   |             | 8.7                 |             | 18.7    |             | 19.7                 |             | 9.2         |             | 15.1   |             | 14.7 |             |
| <b>Ovary</b>      |                        |             |                     |             |         |             |                      |             |             |             |        |             |      |             |
| 1995-1999         | 70.3                   | (68.8-71.8) | 70.0                | (68.9-71.0) | 63.7    | (61.8-65.6) | 56.2                 | (53.4-58.9) | 60.7        | (57.8-63.6) | 70.6   | (68.6-72.6) | 55.5 | (54.9-56.1) |
| 2000-2004         | 72.9                   | (71.4-74.3) | 71.8                | (70.8-72.8) | 68.7    | (66.8-70.5) | 59.5                 | (56.8-62.1) | 63.7        | (60.8-66.5) | 75.2   | (73.3-77.0) | 59.9 | (59.4-60.5) |
| 2005-2009         | 75.1                   | (73.8-76.4) | 72.9                | (72.0-73.9) | 72.6    | (70.8-74.3) | 63.8                 | (61.2-66.2) | 65.0        | (62.4-67.6) | 75.9   | (74.1-77.7) | 64.4 | (63.8-64.9) |
| 2010-2014         | 78.5                   | (76.7-80.1) | 72.6                | (71.4-73.7) | 77.4    | (75.3-79.3) | 69.5                 | (66.1-72.6) | 71.5        | (68.5-74.4) | 77.5   | (75.2-79.7) | 70.3 | (69.6-70.9) |

|             |     |     |      |      |      |     |      |
|-------------|-----|-----|------|------|------|-----|------|
| abs change* | 8.2 | 2.6 | 13.7 | 13.3 | 10.8 | 6.9 | 14.8 |
|-------------|-----|-----|------|------|------|-----|------|

\* Absolute change between 1995-1999 and 2010-2014

† Australia includes New South Wales (1995-2012), Victoria and Western Australia

‡ Canada includes Alberta, British Columbia, Manitoba, New Brunswick, Nova Scotia, Ontario, Prince Edward Island and Saskatchewan

¶ Ireland (1995-2013)

**Table S2. Age-standardized 1-year net survival (in %) and 95% confidence intervals by cancer site, country and period of diagnosis in patients aged <75 years**

|                   | Australia <sup>†</sup> |             | Canada <sup>‡</sup> |             | Denmark |             | Ireland <sup>§</sup> |             | New Zealand |             | Norway |             | UK   |             |
|-------------------|------------------------|-------------|---------------------|-------------|---------|-------------|----------------------|-------------|-------------|-------------|--------|-------------|------|-------------|
| <b>Oesophagus</b> |                        |             |                     |             |         |             |                      |             |             |             |        |             |      |             |
| 1995-1999         | 47.5                   | (45.2-49.8) | 42.3                | (40.5-44.1) | 29.7    | (26.8-32.7) | 35.6                 | (32.4-38.9) | 32.5        | (28.4-36.7) | 30.7   | (26.5-35.0) | 34.6 | (33.9-35.3) |
| 2000-2004         | 48.1                   | (45.9-50.2) | 44.1                | (42.4-45.8) | 33.2    | (30.5-36.0) | 42.3                 | (39.1-45.5) | 40.4        | (36.2-44.5) | 37.6   | (33.2-42.0) | 42.0 | (41.3-42.7) |
| 2005-2009         | 52.4                   | (50.2-54.4) | 44.7                | (43.0-46.3) | 38.7    | (36.0-41.5) | 49.7                 | (46.6-52.6) | 44.9        | (41.0-48.7) | 46.5   | (42.4-50.5) | 47.1 | (46.4-47.9) |
| 2010-2014         | 56.5                   | (53.6-59.4) | 48.5                | (46.6-50.3) | 49.2    | (45.3-53.0) | 57.2                 | (53.0-61.1) | 48.9        | (44.6-53.1) | 53.3   | (49.0-57.3) | 52.4 | (51.6-53.2) |
| abs change*       | 9.0                    |             | 6.2                 |             | 19.5    |             | 21.6                 |             | 16.4        |             | 22.6   |             | 17.8 |             |
| <b>Stomach</b>    |                        |             |                     |             |         |             |                      |             |             |             |        |             |      |             |
| 1995-1999         | 55.6                   | (54.0-57.1) | 48.7                | (47.4-50.0) | 39.9    | (37.4-42.4) | 37.0                 | (34.5-39.6) | 44.0        | (41.0-46.8) | 46.3   | (43.7-48.8) | 39.8 | (39.2-40.4) |
| 2000-2004         | 57.8                   | (56.2-59.3) | 51.7                | (50.4-52.9) | 41.9    | (39.4-44.4) | 43.6                 | (40.9-46.3) | 47.9        | (44.9-50.8) | 52.4   | (49.7-55.0) | 44.6 | (43.9-45.3) |
| 2005-2009         | 60.0                   | (58.4-61.5) | 53.3                | (52.0-54.5) | 48.6    | (46.2-51.0) | 53.7                 | (51.1-56.3) | 49.8        | (46.8-52.7) | 56.8   | (54.0-59.5) | 49.1 | (48.3-49.8) |
| 2010-2014         | 65.3                   | (63.3-67.3) | 57.1                | (55.6-58.6) | 58.3    | (55.3-61.0) | 57.9                 | (54.4-61.3) | 55.3        | (51.8-58.6) | 58.5   | (55.3-61.6) | 51.6 | (50.6-52.5) |
| abs change*       | 9.7                    |             | 8.4                 |             | 18.4    |             | 20.9                 |             | 11.3        |             | 12.2   |             | 11.8 |             |
| <b>Colon</b>      |                        |             |                     |             |         |             |                      |             |             |             |        |             |      |             |
| 1995-1999         | 82.4                   | (81.8-83.0) | 80.6                | (80.1-81.1) | 74.3    | (73.1-75.4) | 76.0                 | (74.6-77.4) | 78.5        | (77.4-79.6) | 79.8   | (78.6-80.9) | 73.5 | (73.1-73.9) |
| 2000-2004         | 85.5                   | (84.9-86.0) | 83.8                | (83.3-84.2) | 77.8    | (76.7-78.9) | 77.4                 | (76.1-78.7) | 80.8        | (79.7-81.8) | 81.6   | (80.5-82.6) | 76.6 | (76.3-76.9) |
| 2005-2009         | 88.3                   | (87.8-88.8) | 86.6                | (86.2-87.0) | 81.0    | (80.1-82.0) | 84.0                 | (82.9-85.1) | 82.4        | (81.3-83.4) | 83.5   | (82.5-84.5) | 79.5 | (79.2-79.8) |
| 2010-2014         | 90.4                   | (89.8-91.0) | 87.5                | (87.1-88.0) | 86.7    | (85.8-87.6) | 86.0                 | (84.5-87.3) | 84.3        | (83.1-85.4) | 86.6   | (85.6-87.5) | 82.8 | (82.4-83.1) |
| abs change*       | 8.0                    |             | 6.9                 |             | 12.4    |             | 10.0                 |             | 5.8         |             | 6.8    |             | 9.3  |             |
| <b>Rectum</b>     |                        |             |                     |             |         |             |                      |             |             |             |        |             |      |             |
| 1995-1999         | 86.3                   | (85.4-87.2) | 86.6                | (85.8-87.3) | 80.1    | (78.6-81.5) | 77.6                 | (75.5-79.6) | 82.6        | (80.8-84.3) | 84.8   | (83.3-86.2) | 79.2 | (78.7-79.7) |
| 2000-2004         | 89.8                   | (89.1-90.5) | 88.2                | (87.6-88.9) | 83.7    | (82.4-85.0) | 83.2                 | (81.4-84.8) | 86.1        | (84.5-87.6) | 87.0   | (85.7-88.2) | 83.2 | (82.8-83.7) |
| 2005-2009         | 91.8                   | (91.1-92.4) | 90.0                | (89.5-90.6) | 87.8    | (86.8-88.8) | 88.4                 | (86.8-89.7) | 87.6        | (86.1-88.9) | 91.0   | (89.8-92.0) | 85.9 | (85.5-86.3) |
| 2010-2014         | 93.0                   | (92.1-93.7) | 90.6                | (89.9-91.2) | 91.2    | (90.2-92.2) | 90.3                 | (88.4-91.9) | 89.7        | (88.1-91.0) | 92.7   | (91.5-93.7) | 89.2 | (88.8-89.6) |
| abs change*       | 6.7                    |             | 4.0                 |             | 11.1    |             | 12.7                 |             | 7.1         |             | 7.9    |             | 10.0 |             |
| <b>Pancreas</b>   |                        |             |                     |             |         |             |                      |             |             |             |        |             |      |             |
| 1995-1999         | 24.7                   | (23.1-26.3) | 23.5                | (22.4-24.6) | 16.6    | (14.8-18.4) | 15.8                 | (13.4-18.4) | 22.8        | (20.0-25.6) | 19.2   | (17.0-21.5) | 16.3 | (15.8-16.9) |
| 2000-2004         | 30.7                   | (29.2-32.3) | 27.9                | (26.8-29.0) | 21.5    | (19.7-23.2) | 20.4                 | (17.9-23.1) | 22.2        | (19.5-24.9) | 22.2   | (20.0-24.4) | 19.8 | (19.2-20.5) |
| 2005-2009         | 35.5                   | (34.1-37.0) | 31.0                | (29.9-32.0) | 26.0    | (24.2-27.7) | 27.5                 | (25.0-30.1) | 24.6        | (22.1-27.1) | 31.1   | (28.8-33.4) | 25.7 | (25.1-26.4) |
| 2010-2014         | 47.5                   | (45.6-49.4) | 37.9                | (36.7-39.1) | 37.0    | (34.7-39.3) | 37.8                 | (33.8-41.8) | 30.6        | (27.7-33.5) | 37.4   | (34.7-40.0) | 31.6 | (30.8-32.3) |
| abs change*       | 22.8                   |             | 14.4                |             | 20.4    |             | 22.0                 |             | 7.8         |             | 18.2   |             | 15.3 |             |
| <b>Lung</b>       |                        |             |                     |             |         |             |                      |             |             |             |        |             |      |             |
| 1995-1999         | 42.0                   | (41.2-42.8) | 41.5                | (41.0-42.0) | 31.6    | (30.7-32.5) | 28.8                 | (27.4-30.2) | 32.5        | (31.1-33.9) | 35.2   | (33.9-36.4) | 27.7 | (27.3-28.0) |
| 2000-2004         | 44.7                   | (43.9-45.5) | 43.5                | (43.0-43.9) | 38.0    | (37.1-39.0) | 32.5                 | (31.1-33.8) | 34.7        | (33.4-36.0) | 38.0   | (36.7-39.2) | 31.6 | (31.3-31.9) |
| 2005-2009         | 48.7                   | (47.9-49.5) | 45.9                | (45.4-46.4) | 41.1    | (40.2-42.1) | 39.3                 | (38.0-40.6) | 36.7        | (35.3-38.0) | 45.6   | (44.3-46.8) | 35.5 | (35.2-35.8) |
| 2010-2014         | 53.3                   | (52.3-54.3) | 50.9                | (50.3-51.5) | 50.4    | (49.2-51.5) | 50.9                 | (49.1-52.7) | 44.9        | (43.3-46.5) | 52.0   | (50.5-53.4) | 42.8 | (42.4-43.2) |
| abs change*       | 11.3                   |             | 9.4                 |             | 18.8    |             | 22.1                 |             | 12.4        |             | 16.8   |             | 15.1 |             |
| <b>Ovary</b>      |                        |             |                     |             |         |             |                      |             |             |             |        |             |      |             |
| 1995-1999         | 81.3                   | (79.7-82.7) | 78.8                | (77.7-79.8) | 74.2    | (72.3-76.1) | 67.1                 | (64.1-70.0) | 70.8        | (67.5-73.8) | 80.4   | (78.3-82.3) | 65.4 | (64.7-66.0) |
| 2000-2004         | 82.3                   | (80.8-83.7) | 81.8                | (80.7-82.8) | 78.8    | (76.9-80.5) | 71.0                 | (68.2-73.6) | 75.0        | (71.9-77.8) | 85.9   | (84.0-87.6) | 70.6 | (69.9-71.2) |
| 2005-2009         | 84.9                   | (83.6-86.2) | 83.0                | (82.0-84.0) | 82.2    | (80.5-83.8) | 77.3                 | (74.8-79.7) | 76.5        | (73.6-79.0) | 86.5   | (84.7-88.2) | 75.1 | (74.5-75.7) |

|             |      |             |      |             |      |             |      |             |      |             |      |             |      |             |
|-------------|------|-------------|------|-------------|------|-------------|------|-------------|------|-------------|------|-------------|------|-------------|
| 2010-2014   | 88.6 | (87.0-90.0) | 83.2 | (82.1-84.3) | 85.5 | (83.4-87.2) | 82.1 | (78.7-85.1) | 80.9 | (77.6-83.7) | 87.4 | (85.3-89.2) | 80.7 | (80.1-81.3) |
| abs change* | 7.3  |             | 4.4  |             | 11.3 |             | 15.0 |             | 10.1 |             | 7.0  |             | 15.3 |             |

\* Absolute change between 1995-1999 and 2010-2014

† Australia includes New South Wales (1995-2012), Victoria and Western Australia

‡ Canada includes Alberta, British Columbia, Manitoba, New Brunswick, Nova Scotia, Ontario, Prince Edward Island and Saskatchewan

¶ Ireland (1995-2013)

**Table S3. Age-standardized 1-year net survival (in %) and 95% confidence intervals by cancer site, country and period of diagnosis in patients aged 75+ years**

|                   | Australia <sup>†</sup> |             | Canada <sup>‡</sup> |             | Denmark |             | Ireland <sup>§</sup> |             | New Zealand |             | Norway |             | UK   |             |
|-------------------|------------------------|-------------|---------------------|-------------|---------|-------------|----------------------|-------------|-------------|-------------|--------|-------------|------|-------------|
| <b>Oesophagus</b> |                        |             |                     |             |         |             |                      |             |             |             |        |             |      |             |
| 1995-1999         | 30.6                   | (28.0-33.3) | 28.7                | (26.4-31.2) | 20.6    | (17.0-24.4) | 18.9                 | (15.5-22.5) | 22.1        | (17.9-26.5) | 21.0   | (16.3-26.1) | 18.2 | (17.5-18.8) |
| 2000-2004         | 33.1                   | (30.6-35.6) | 28.8                | (26.6-31.0) | 20.8    | (17.6-24.3) | 22.6                 | (19.2-26.2) | 21.9        | (18.3-25.7) | 23.4   | (18.8-28.2) | 23.0 | (22.3-23.7) |
| 2005-2009         | 35.8                   | (33.4-38.1) | 30.9                | (28.9-33.0) | 21.2    | (17.8-24.7) | 28.3                 | (24.8-32.0) | 28.3        | (24.5-32.2) | 27.6   | (22.8-32.6) | 27.3 | (26.6-28.0) |
| 2010-2014         | 40.7                   | (37.3-44.1) | 31.4                | (29.0-33.9) | 32.8    | (28.5-37.1) | 32.5                 | (27.4-37.8) | 32.1        | (27.5-36.8) | 32.2   | (26.8-37.7) | 31.7 | (30.8-32.5) |
| abs change*       | 10.1                   |             | 2.7                 |             | 12.2    |             | 13.6                 |             | 10.0        |             | 11.2   |             | 13.5 |             |
| <b>Stomach</b>    |                        |             |                     |             |         |             |                      |             |             |             |        |             |      |             |
| 1995-1999         | 37.9                   | (35.9-40.0) | 36.2                | (34.5-37.8) | 28.5    | (25.5-31.4) | 24.3                 | (21.3-27.4) | 30.5        | (27.0-34.0) | 34.1   | (31.6-36.5) | 22.2 | (21.6-22.8) |
| 2000-2004         | 40.9                   | (38.9-42.9) | 36.4                | (34.8-37.9) | 27.5    | (24.4-30.6) | 25.5                 | (22.4-28.6) | 29.1        | (25.7-32.6) | 34.8   | (32.1-37.4) | 26.2 | (25.6-26.9) |
| 2005-2009         | 43.7                   | (41.7-45.7) | 40.0                | (38.4-41.5) | 31.3    | (28.2-34.5) | 31.3                 | (28.2-34.4) | 36.3        | (32.4-40.1) | 36.6   | (33.8-39.5) | 29.7 | (29.0-30.4) |
| 2010-2014         | 44.8                   | (42.1-47.5) | 41.5                | (39.6-43.4) | 38.5    | (34.5-42.4) | 38.7                 | (34.3-43.1) | 33.4        | (29.0-37.8) | 40.9   | (36.9-44.8) | 34.9 | (34.0-35.8) |
| abs change*       | 6.9                    |             | 5.3                 |             | 10.0    |             | 14.4                 |             | 2.9         |             | 6.8    |             | 12.7 |             |
| <b>Colon</b>      |                        |             |                     |             |         |             |                      |             |             |             |        |             |      |             |
| 1995-1999         | 70.3                   | (69.3-71.3) | 70.3                | (69.6-71.1) | 62.5    | (60.9-64.0) | 58.5                 | (56.1-60.8) | 71.1        | (69.3-72.9) | 67.8   | (66.3-69.3) | 53.4 | (52.9-53.8) |
| 2000-2004         | 72.9                   | (72.0-73.8) | 71.9                | (71.2-72.6) | 60.9    | (59.4-62.4) | 59.3                 | (57.2-61.4) | 71.7        | (70.1-73.3) | 67.0   | (65.6-68.4) | 57.2 | (56.7-57.7) |
| 2005-2009         | 75.4                   | (74.6-76.2) | 72.8                | (72.1-73.5) | 63.3    | (61.8-64.6) | 64.2                 | (62.3-66.1) | 71.2        | (69.6-72.7) | 71.7   | (70.4-73.0) | 60.6 | (60.2-61.1) |
| 2010-2014         | 78.7                   | (77.6-79.8) | 73.2                | (72.4-74.0) | 73.1    | (71.5-74.6) | 68.2                 | (65.6-70.6) | 72.4        | (70.7-74.1) | 72.8   | (71.3-74.3) | 62.8 | (62.3-63.3) |
| abs change*       | 8.4                    |             | 2.9                 |             | 10.6    |             | 9.7                  |             | 1.3         |             | 5.0    |             | 9.4  |             |
| <b>Rectum</b>     |                        |             |                     |             |         |             |                      |             |             |             |        |             |      |             |
| 1995-1999         | 73.4                   | (71.5-75.2) | 74.9                | (73.3-76.4) | 64.7    | (62.2-67.0) | 63.4                 | (59.4-67.1) | 72.0        | (68.3-75.4) | 72.0   | (69.6-74.3) | 57.7 | (56.9-58.5) |
| 2000-2004         | 76.1                   | (74.5-77.6) | 76.4                | (75.0-77.8) | 67.6    | (65.3-69.9) | 57.9                 | (54.1-61.5) | 73.7        | (70.5-76.7) | 72.2   | (69.9-74.4) | 62.8 | (62.1-63.6) |
| 2005-2009         | 78.4                   | (76.9-79.9) | 77.0                | (75.7-78.3) | 69.9    | (67.7-72.0) | 65.0                 | (61.5-68.3) | 74.7        | (71.6-77.5) | 73.9   | (71.6-76.1) | 67.5 | (66.7-68.2) |
| 2010-2014         | 81.4                   | (79.2-83.4) | 76.9                | (75.3-78.5) | 78.6    | (76.2-80.7) | 78.0                 | (73.2-82.0) | 76.9        | (73.5-79.9) | 80.5   | (77.7-83.0) | 74.0 | (73.2-74.9) |
| abs change*       | 8.0                    |             | 2.0                 |             | 13.9    |             | 14.6                 |             | 4.9         |             | 8.5    |             | 16.3 |             |
| <b>Pancreas</b>   |                        |             |                     |             |         |             |                      |             |             |             |        |             |      |             |
| 1995-1999         | 13.5                   | (12.1-14.9) | 12.0                | (11.0-13.0) | 9.1     | (7.5-10.9)  | 8.4                  | (6.3-10.8)  | 11.5        | (9.1-14.3)  | 7.6    | (6.2-9.2)   | 7.3  | (6.9-7.7)   |
| 2000-2004         | 16.4                   | (15.0-17.8) | 13.6                | (12.6-14.6) | 8.0     | (6.6-9.5)   | 10.9                 | (8.7-13.3)  | 12.1        | (9.7-14.8)  | 10.8   | (9.2-12.5)  | 8.4  | (7.9-8.9)   |
| 2005-2009         | 16.0                   | (14.8-17.2) | 15.8                | (14.8-16.8) | 11.8    | (10.2-13.5) | 12.3                 | (10.2-14.7) | 10.4        | (8.4-12.5)  | 11.8   | (10.2-13.6) | 10.1 | (9.6-10.5)  |
| 2010-2014         | 21.8                   | (20.0-23.7) | 15.6                | (14.5-16.8) | 16.9    | (14.7-19.2) | 15.8                 | (12.7-19.2) | 11.1        | (9.0-13.4)  | 13.5   | (11.5-15.7) | 13.2 | (12.7-13.8) |
| abs change*       | 8.3                    |             | 3.6                 |             | 7.8     |             | 7.4                  |             | -0.4        |             | 5.9    |             | 5.9  |             |
| <b>Lung</b>       |                        |             |                     |             |         |             |                      |             |             |             |        |             |      |             |
| 1995-1999         | 27.6                   | (26.6-28.6) | 30.7                | (30.0-31.4) | 17.5    | (16.3-18.7) | 17.3                 | (15.7-18.9) | 26.3        | (24.5-28.2) | 22.8   | (21.2-24.5) | 15.7 | (15.4-15.9) |
| 2000-2004         | 30.1                   | (29.2-31.0) | 31.3                | (30.7-31.9) | 22.1    | (20.9-23.3) | 17.8                 | (16.4-19.3) | 24.5        | (22.8-26.1) | 23.1   | (21.7-24.6) | 19.1 | (18.8-19.4) |
| 2005-2009         | 31.8                   | (30.9-32.6) | 33.5                | (32.9-34.1) | 24.9    | (23.8-26.0) | 22.6                 | (21.2-24.1) | 24.8        | (23.2-26.3) | 27.5   | (26.1-28.9) | 21.8 | (21.5-22.1) |
| 2010-2014         | 38.0                   | (36.8-39.2) | 37.3                | (36.6-38.0) | 36.1    | (34.7-37.5) | 31.1                 | (29.0-33.2) | 27.5        | (25.7-29.3) | 33.8   | (32.1-35.5) | 29.4 | (29.0-29.8) |
| abs change*       | 10.4                   |             | 6.6                 |             | 18.6    |             | 13.8                 |             | 1.2         |             | 11.0   |             | 13.7 |             |
| <b>Ovary</b>      |                        |             |                     |             |         |             |                      |             |             |             |        |             |      |             |
| 1995-1999         | 43.4                   | (40.3-46.5) | 48.5                | (46.2-50.8) | 38.1    | (34.2-42.1) | 29.5                 | (24.4-34.8) | 36.3        | (30.7-41.8) | 46.8   | (42.5-50.9) | 31.4 | (30.4-32.5) |
| 2000-2004         | 50.0                   | (47.0-52.9) | 47.4                | (45.3-49.4) | 43.9    | (39.9-47.7) | 31.5                 | (26.6-36.6) | 36.2        | (30.8-41.6) | 49.2   | (45.2-53.0) | 34.1 | (33.1-35.1) |
| 2005-2009         | 51.2                   | (48.3-54.0) | 48.3                | (46.3-50.3) | 49.1    | (45.2-53.0) | 30.5                 | (25.9-35.3) | 37.1        | (32.1-42.1) | 50.0   | (46.0-53.9) | 38.2 | (37.1-39.2) |



|             |      |             |      |             |      |             |     |             |      |             |     |             |      |             |
|-------------|------|-------------|------|-------------|------|-------------|-----|-------------|------|-------------|-----|-------------|------|-------------|
| 2010-2014   | 54   | (49.7-57.7) | 47   | (44.6-49.7) | 58   | (52.8-62.1) | 38  | (32.0-44.8) | 48   | (41.5-53.9) | 54  | (48.7-59.1) | 45   | (43.5-45.9) |
| abs change* | 10.4 |             | -1.3 |             | 19.5 |             | 8.9 |             | 11.5 |             | 7.3 |             | 13.3 |             |

\* Absolute change between 1995-1999 and 2010-2014

† Australia includes New South Wales (1995-2012), Victoria and Western Australia

‡ Canada includes Alberta, British Columbia, Manitoba, New Brunswick, Nova Scotia, Ontario, Prince Edward Island and Saskatchewan

¶ Ireland (1995-2013)

**Table S4. Age-standardized 1-year net survival (in %) and 95% confidence intervals by cancer site, jurisdiction and period of diagnosis**

|                   | Australia                    |             |          | Canada            |      |             |      |                  |      |             |               |             |             |             |      |             |
|-------------------|------------------------------|-------------|----------|-------------------|------|-------------|------|------------------|------|-------------|---------------|-------------|-------------|-------------|------|-------------|
|                   | New South Wales <sup>†</sup> |             | Victoria | Western Australia |      | Alberta     |      | British Columbia |      | Manitoba    | New Brunswick |             | Nova Scotia |             |      |             |
| <b>Oesophagus</b> |                              |             |          |                   |      |             |      |                  |      |             |               |             |             |             |      |             |
| 1995-1999         | 42.8                         | (40.2-45.4) | 43.1     | (40.0-46.1)       | 40.5 | (35.6-45.4) | 36.0 | (31.0-41.0)      | 37.3 | (33.9-40.6) | 38.9          | (32.1-45.6) | 32.8        | (25.2-40.5) | 36.7 | (29.6-43.8) |
| 2000-2004         | 41.6                         | (39.1-44.0) | 46.3     | (43.5-49.0)       | 44.6 | (40.1-49.0) | 36.7 | (32.2-41.1)      | 37.6 | (34.5-40.7) | 33.8          | (27.5-40.1) | 39.3        | (31.3-47.1) | 30.5 | (24.3-36.9) |
| 2005-2009         | 44.5                         | (42.2-46.9) | 50.0     | (47.2-52.6)       | 51.7 | (47.3-55.9) | 37.7 | (34.1-41.4)      | 42.3 | (39.1-45.5) | 39.2          | (33.1-45.3) | 38.6        | (31.7-45.5) | 40.3 | (34.5-46.0) |
| 2010-2014         | 46.5                         | (42.0-50.9) | 53.4     | (50.1-56.5)       | 56.7 | (51.8-61.3) | 41.1 | (37.1-45.1)      | 46.5 | (43.2-49.8) | 37.5          | (30.6-44.4) | 46.7        | (38.0-55.0) | 41.5 | (35.0-47.8) |
| abs change*       | 3.7                          |             | 10.3     |                   | 16.2 |             | 5.1  |                  | 9.2  |             | -1.4          |             | 13.9        |             | 4.8  |             |
| <b>Stomach</b>    |                              |             |          |                   |      |             |      |                  |      |             |               |             |             |             |      |             |
| 1995-1999         | 52.3                         | (50.5-54.1) | 48.9     | (46.9-50.9)       | 48.1 | (44.5-51.5) | 42.9 | (39.7-45.9)      | 43.5 | (41.0-45.9) | 38.3          | (33.8-42.6) | 43.8        | (38.6-48.9) | 39.8 | (35.1-44.5) |
| 2000-2004         | 53.5                         | (51.7-55.3) | 52.6     | (50.6-54.6)       | 51.1 | (47.3-54.7) | 41.9 | (38.9-44.8)      | 45.3 | (42.9-47.8) | 47.3          | (42.8-51.5) | 41.8        | (36.5-47.0) | 40.4 | (35.6-45.0) |
| 2005-2009         | 54.9                         | (53.1-56.7) | 55.4     | (53.4-57.4)       | 56.1 | (52.6-59.5) | 44.9 | (42.0-47.7)      | 48.0 | (45.6-50.4) | 42.2          | (37.9-46.4) | 47.5        | (42.3-52.5) | 43.7 | (38.9-48.3) |
| 2010-2014         | 56.1                         | (52.9-59.2) | 60.7     | (58.4-62.8)       | 60.5 | (56.7-64.2) | 49.0 | (45.5-52.4)      | 48.3 | (45.3-51.1) | 52.5          | (47.1-57.5) | 49.7        | (43.0-55.9) | 47.0 | (40.8-52.9) |
| abs change*       | 3.8                          |             | 11.8     |                   | 12.4 |             | 6.1  |                  | 4.8  |             | 14.2          |             | 5.9         |             | 7.2  |             |
| <b>Colon</b>      |                              |             |          |                   |      |             |      |                  |      |             |               |             |             |             |      |             |
| 1995-1999         | 79.6                         | (78.9-80.3) | 78.2     | (77.4-79.1)       | 78.1 | (76.6-79.5) | 76.2 | (74.8-77.5)      | 78.6 | (77.5-79.6) | 78.4          | (76.7-80.1) | 78.9        | (76.8-80.9) | 75.8 | (73.9-77.6) |
| 2000-2004         | 82.5                         | (81.8-83.1) | 80.7     | (79.9-81.4)       | 82.8 | (81.5-84.0) | 78.6 | (77.4-79.8)      | 80.6 | (79.7-81.5) | 79.4          | (77.8-81.0) | 81.0        | (79.0-82.8) | 79.8 | (78.1-81.3) |
| 2005-2009         | 84.3                         | (83.7-84.8) | 84.8     | (84.1-85.5)       | 85.0 | (83.8-86.1) | 80.4 | (79.3-81.5)      | 83.0 | (82.2-83.8) | 81.5          | (79.9-82.9) | 82.1        | (80.3-83.7) | 80.7 | (79.1-82.2) |
| 2010-2014         | 86.9                         | (85.8-87.8) | 87.1     | (86.3-87.8)       | 87.2 | (85.9-88.3) | 82.3 | (81.1-83.4)      | 83.6 | (82.7-84.5) | 81.5          | (79.5-83.2) | 84.1        | (82.0-86.0) | 78.8 | (76.7-80.6) |
| abs change*       | 7.3                          |             | 8.9      |                   | 9.1  |             | 6.1  |                  | 5.0  |             | 3.1           |             | 5.2         |             | 3.0  |             |
| <b>Rectum</b>     |                              |             |          |                   |      |             |      |                  |      |             |               |             |             |             |      |             |
| 1995-1999         | 83.1                         | (81.9-84.3) | 82.1     | (80.8-83.4)       | 81.8 | (79.3-84.0) | 82.7 | (80.5-84.8)      | 84.0 | (82.4-85.5) | 83.9          | (80.9-86.5) | 83.5        | (79.0-87.1) | 80.6 | (77.1-83.5) |
| 2000-2004         | 85.8                         | (84.8-86.8) | 86.1     | (85.0-87.1)       | 85.3 | (83.2-87.1) | 83.9 | (82.0-85.7)      | 84.9 | (83.5-86.2) | 83.2          | (80.3-85.7) | 80.0        | (75.2-84.0) | 84.6 | (81.7-87.1) |
| 2005-2009         | 87.8                         | (86.8-88.6) | 88.3     | (87.3-89.3)       | 87.2 | (85.2-88.8) | 85.1 | (83.3-86.7)      | 85.2 | (83.8-86.4) | 86.0          | (83.4-88.3) | 84.7        | (81.0-87.8) | 84.6 | (81.9-86.9) |
| 2010-2014         | 88.7                         | (86.9-90.3) | 90.8     | (89.6-91.8)       | 87.4 | (85.1-89.4) | 86.5 | (84.5-88.2)      | 87.7 | (86.3-89.0) | 84.5          | (81.4-87.1) | 85.3        | (81.3-88.5) | 81.6 | (78.1-84.7) |
| abs change*       | 5.6                          |             | 8.7      |                   | 5.6  |             | 3.8  |                  | 3.7  |             | 0.6           |             | 1.8         |             | 1.0  |             |
| <b>Pancreas</b>   |                              |             |          |                   |      |             |      |                  |      |             |               |             |             |             |      |             |
| 1995-1999         | 21.4                         | (19.7-23.2) | 21.6     | (19.7-23.7)       | 20.6 | (17.6-23.8) | 14.7 | (12.7-16.9)      | 17.3 | (15.5-19.1) | 17.9          | (14.6-21.4) | 19.5        | (15.6-23.8) | 20.4 | (16.8-24.3) |
| 2000-2004         | 27.2                         | (25.5-28.9) | 25.6     | (23.7-27.5)       | 26.9 | (23.7-30.2) | 20.6 | (18.4-22.9)      | 21.0 | (19.1-22.8) | 18.2          | (15.0-21.5) | 25.8        | (21.7-30.1) | 17.1 | (13.6-21.0) |
| 2005-2009         | 28.7                         | (27.2-30.3) | 30.4     | (28.5-32.2)       | 32.1 | (29.2-35.1) | 22.1 | (20.1-24.3)      | 24.5 | (22.6-26.4) | 21.3          | (17.9-25.0) | 22.9        | (19.0-26.9) | 19.8 | (16.4-23.4) |
| 2010-2014         | 35.5                         | (32.8-38.2) | 40.6     | (38.5-42.6)       | 45.2 | (42.0-48.4) | 29.8 | (27.5-32.2)      | 29.7 | (27.6-31.7) | 31.2          | (27.4-35.1) | 28.5        | (23.7-33.5) | 21.6 | (17.8-25.6) |
| abs change*       | 14.1                         |             | 19.0     |                   | 24.6 |             | 15.1 |                  | 12.4 |             | 13.3          |             | 9.0         |             | 1.2  |             |
| <b>Lung</b>       |                              |             |          |                   |      |             |      |                  |      |             |               |             |             |             |      |             |
| 1995-1999         | 38.4                         | (37.5-39.3) | 37.7     | (36.6-38.7)       | 36.5 | (34.7-38.2) | 36.0 | (34.7-37.3)      | 36.0 | (35.1-36.9) | 39.0          | (37.2-40.7) | 39.5        | (37.5-41.5) | 36.3 | (34.6-38.0) |
| 2000-2004         | 40.8                         | (40.0-41.7) | 40.2     | (39.2-41.2)       | 39.9 | (38.1-41.6) | 37.1 | (35.9-38.3)      | 37.9 | (37.0-38.9) | 43.0          | (41.2-44.7) | 41.9        | (39.9-43.8) | 39.1 | (37.4-40.8) |
| 2005-2009         | 43.6                         | (42.8-44.4) | 43.8     | (42.8-44.8)       | 44.4 | (42.8-46.0) | 41.2 | (40.0-42.3)      | 42.3 | (41.4-43.3) | 43.5          | (41.8-45.2) | 42.4        | (40.4-44.3) | 39.8 | (38.0-41.5) |
| 2010-2014         | 46.5                         | (45.0-48.0) | 49.7     | (48.5-50.8)       | 50.4 | (48.6-52.1) | 47.0 | (45.7-48.3)      | 46.4 | (45.3-47.6) | 45.3          | (43.2-47.4) | 51.7        | (49.5-53.9) | 43.4 | (41.4-45.4) |
| abs change*       | 8.1                          |             | 12.0     |                   | 13.9 |             | 11.0 |                  | 10.4 |             | 6.3           |             | 12.2        |             | 7.1  |             |
| <b>Ovary</b>      |                              |             |          |                   |      |             |      |                  |      |             |               |             |             |             |      |             |
| 1995-1999         | 70.3                         | (68.0-72.4) | 71.0     | (68.5-73.3)       | 68.0 | (63.2-72.3) | 65.7 | (62.1-69.1)      | 72.7 | (70.2-75.1) | 69.3          | (64.4-73.6) | 62.7        | (55.6-69.0) | 70.9 | (65.3-75.8) |
| 2000-2004         | 74.1                         | (72.0-76.0) | 71.1     | (68.7-73.3)       | 73.8 | (69.8-77.4) | 69.5 | (66.2-72.6)      | 73.4 | (70.9-75.6) | 70.5          | (66.0-74.5) | 66.4        | (60.6-71.6) | 67.6 | (61.9-72.7) |
| 2005-2009         | 73.4                         | (71.4-75.3) | 76.0     | (73.8-78.0)       | 78.8 | (75.2-82.0) | 72.1 | (68.9-75.1)      | 73.9 | (71.5-76.0) | 68.6          | (63.9-72.8) | 70.1        | (64.5-75.1) | 74.4 | (69.4-78.7) |
| 2010-2014         | 76.3                         | (72.7-79.6) | 78.5     | (75.9-80.8)       | 81.2 | (77.2-84.5) | 71.2 | (67.5-74.6)      | 75.2 | (72.6-77.6) | 77.1          | (70.8-82.2) | 67.8        | (61.0-73.7) | 67.0 | (60.8-72.4) |
| abs change*       | 6.0                          |             | 7.5      |                   | 13.2 |             | 5.5  |                  | 2.5  |             | 7.8           |             | 5.1         |             | -3.9 |             |

\* Absolute change between 1995-1999 and 2010-2014, <sup>†</sup>New South Wales (1995-2012), <sup>‡</sup>Ireland (1995-2013)

**Table S4 (cont.). Age-standardized 1-year net survival (in %) and 95% confidence intervals by cancer site, jurisdiction and period of diagnosis**

|                   | Canada  |             |                    |             |              |             |         |             |                      |             |             |             |        |             |
|-------------------|---------|-------------|--------------------|-------------|--------------|-------------|---------|-------------|----------------------|-------------|-------------|-------------|--------|-------------|
|                   | Ontario |             | Prince Edward Isl. |             | Saskatchewan |             | Denmark |             | Ireland <sup>‡</sup> |             | New Zealand |             | Norway |             |
| <b>Oesophagus</b> |         |             |                    |             |              |             |         |             |                      |             |             |             |        |             |
| 1995-1999         | 40.6    | (38.6-42.7) | 27.0               | (13.3-42.7) | 27.4         | (21.2-33.8) | 27.1    | (24.7-29.4) | 30.8                 | (28.3-33.3) | 29.5        | (26.3-32.7) | 27.9   | (24.6-31.3) |
| 2000-2004         | 43.0    | (41.1-44.9) | 30.1               | (15.6-46.1) | 32.9         | (26.4-39.5) | 29.6    | (27.4-31.8) | 36.6                 | (34.1-39.1) | 35.0        | (31.9-38.1) | 33.5   | (30.1-36.9) |
| 2005-2009         | 41.8    | (40.0-43.6) | 29.6               | (15.5-45.1) | 32.7         | (25.6-40.0) | 33.6    | (31.4-35.9) | 43.5                 | (41.1-45.8) | 40.1        | (37.1-43.0) | 41.0   | (37.8-44.3) |
| 2010-2014         | 44.3    | (42.1-46.4) | 36.8               | (23.0-50.6) | 41.3         | (33.6-48.7) | 44.4    | (41.4-47.4) | 49.9                 | (46.6-53.2) | 44.1        | (40.8-47.3) | 47.3   | (43.8-50.6) |
| abs change*       | 3.7     |             | 9.8                |             | 13.9         |             | 17.3    |             | 19.1                 |             | 14.6        |             | 19.4   |             |
| <b>Stomach</b>    |         |             |                    |             |              |             |         |             |                      |             |             |             |        |             |
| 1995-1999         | 47.9    | (46.5-49.3) | 33.0               | (20.7-45.8) | 41.4         | (36.5-46.2) | 36.6    | (34.6-38.5) | 33.3                 | (31.3-35.4) | 40.0        | (37.8-42.3) | 42.7   | (40.8-44.7) |
| 2000-2004         | 50.4    | (49.0-51.8) | 46.0               | (30.5-60.2) | 41.4         | (36.4-46.4) | 37.7    | (35.7-39.7) | 38.3                 | (36.2-40.5) | 42.4        | (40.1-44.7) | 47.3   | (45.2-49.3) |
| 2005-2009         | 52.7    | (51.4-54.0) | 40.1               | (25.8-54.1) | 43.9         | (38.9-48.8) | 43.6    | (41.6-45.5) | 47.2                 | (45.1-49.3) | 45.9        | (43.5-48.2) | 50.9   | (48.8-53.1) |
| 2010-2014         | 55.4    | (53.8-57.0) | 49.9               | (34.4-63.7) | 51.5         | (45.6-57.1) | 52.5    | (50.1-54.9) | 52.3                 | (49.5-55.0) | 49.0        | (46.2-51.7) | 53.5   | (50.9-56.0) |
| abs change*       | 7.5     |             | 16.9               |             | 10.1         |             | 15.9    |             | 19.0                 |             | 9.0         |             | 10.8   |             |
| <b>Colon</b>      |         |             |                    |             |              |             |         |             |                      |             |             |             |        |             |
| 1995-1999         | 77.5    | (76.9-78.1) | 78.2               | (72.5-82.8) | 78.6         | (76.5-80.4) | 70.9    | (69.9-71.8) | 70.9                 | (69.7-72.1) | 76.4        | (75.4-77.3) | 76.3   | (75.4-77.2) |
| 2000-2004         | 80.9    | (80.4-81.4) | 78.5               | (73.4-82.7) | 77.9         | (75.9-79.6) | 72.9    | (72.0-73.8) | 72.2                 | (71.0-73.3) | 78.2        | (77.2-79.0) | 77.3   | (76.5-78.2) |
| 2005-2009         | 83.4    | (83.0-83.9) | 80.9               | (76.0-84.9) | 80.8         | (79.0-82.4) | 75.9    | (75.1-76.7) | 78.3                 | (77.3-79.2) | 79.1        | (78.3-80.0) | 80.1   | (79.3-80.9) |
| 2010-2014         | 84.2    | (83.6-84.7) | 82.1               | (78.0-85.6) | 83.1         | (81.2-84.7) | 82.8    | (82.0-83.6) | 80.8                 | (79.5-82.0) | 80.8        | (79.9-81.8) | 82.6   | (81.8-83.4) |
| abs change*       | 6.7     |             | 3.9                |             | 4.5          |             | 11.9    |             | 9.9                  |             | 4.4         |             | 6.3    |             |
| <b>Rectum</b>     |         |             |                    |             |              |             |         |             |                      |             |             |             |        |             |
| 1995-1999         | 83.4    | (82.3-84.4) | 81.3               | (70.5-88.4) | 81.3         | (77.9-84.2) | 75.6    | (74.3-76.8) | 73.5                 | (71.6-75.3) | 79.6        | (77.9-81.1) | 81.1   | (79.8-82.3) |
| 2000-2004         | 85.9    | (85.0-86.7) | 81.3               | (72.2-87.6) | 81.0         | (77.7-83.9) | 79.1    | (77.9-80.2) | 75.9                 | (74.1-77.5) | 82.5        | (81.0-83.9) | 82.7   | (81.6-83.8) |
| 2005-2009         | 87.4    | (86.6-88.1) | 89.2               | (79.7-94.5) | 85.5         | (82.8-87.8) | 82.6    | (81.6-83.6) | 81.6                 | (80.1-83.0) | 83.9        | (82.5-85.1) | 86.0   | (85.0-87.0) |
| 2010-2014         | 87.0    | (86.0-88.0) | 87.3               | (79.3-92.4) | 85.2         | (81.9-87.8) | 87.6    | (86.6-88.5) | 86.7                 | (84.7-88.4) | 85.9        | (84.5-87.3) | 89.1   | (88.0-90.2) |
| abs change*       | 3.6     |             | 6.0                |             | 3.9          |             | 12.0    |             | 13.2                 |             | 6.3         |             | 8.0    |             |
| <b>Pancreas</b>   |         |             |                    |             |              |             |         |             |                      |             |             |             |        |             |
| 1995-1999         | 23.3    | (22.1-24.6) | 10.7               | (4.0-21.1)  | 13.6         | (10.3-17.3) | 14.4    | (13.1-15.8) | 13.7                 | (11.8-15.6) | 19.5        | (17.4-21.6) | 15.9   | (14.3-17.5) |
| 2000-2004         | 26.9    | (25.7-28.1) | 19.3               | (11.0-29.3) | 19.9         | (16.1-23.9) | 17.5    | (16.3-18.9) | 17.6                 | (15.7-19.7) | 19.2        | (17.2-21.3) | 18.9   | (17.3-20.5) |
| 2005-2009         | 30.4    | (29.2-31.5) | 28.3               | (19.1-38.2) | 19.1         | (15.9-22.6) | 21.9    | (20.5-23.2) | 23.1                 | (21.2-25.1) | 20.4        | (18.6-22.3) | 25.5   | (23.8-27.2) |
| 2010-2014         | 33.8    | (32.4-35.1) | 27.2               | (19.3-35.7) | 30.2         | (25.7-34.7) | 31.1    | (29.3-32.8) | 31.4                 | (28.4-34.4) | 24.8        | (22.7-27.0) | 30.5   | (28.5-32.4) |
| abs change*       | 10.5    |             | 16.5               |             | 16.6         |             | 16.7    |             | 17.7                 |             | 5.3         |             | 14.6   |             |
| <b>Lung</b>       |         |             |                    |             |              |             |         |             |                      |             |             |             |        |             |
| 1995-1999         | 39.9    | (39.3-40.4) | 38.1               | (33.7-42.5) | 36.2         | (34.2-38.1) | 27.5    | (26.7-28.2) | 25.5                 | (24.4-26.6) | 30.7        | (29.5-31.8) | 31.6   | (30.6-32.6) |
| 2000-2004         | 41.0    | (40.5-41.6) | 32.1               | (27.6-36.7) | 37.9         | (35.8-40.0) | 33.4    | (32.7-34.2) | 28.2                 | (27.2-29.3) | 31.7        | (30.7-32.8) | 33.7   | (32.7-34.6) |
| 2005-2009         | 42.8    | (42.2-43.3) | 44.7               | (38.7-50.5) | 41.3         | (39.4-43.2) | 36.4    | (35.7-37.2) | 34.5                 | (33.4-35.5) | 33.2        | (32.2-34.3) | 40.3   | (39.4-41.3) |
| 2010-2014         | 47.5    | (46.8-48.2) | 41.6               | (37.3-45.7) | 46.1         | (43.9-48.3) | 46.2    | (45.3-47.2) | 45.2                 | (43.8-46.6) | 39.9        | (38.6-41.1) | 46.7   | (45.6-47.8) |
| abs change*       | 7.6     |             | 3.5                |             | 9.9          |             | 18.7    |             | 19.7                 |             | 9.2         |             | 15.1   |             |
| <b>Ovary</b>      |         |             |                    |             |              |             |         |             |                      |             |             |             |        |             |
| 1995-1999         | 71.1    | (69.7-72.6) | 71.3               | (54.7-82.7) | 63.4         | (58.2-68.1) | 63.7    | (61.8-65.6) | 56.2                 | (53.4-58.9) | 60.7        | (57.8-63.6) | 70.6   | (68.6-72.6) |
| 2000-2004         | 72.6    | (71.3-73.9) | 72.3               | (57.3-82.8) | 70.7         | (65.5-75.2) | 68.7    | (66.8-70.5) | 59.5                 | (56.8-62.1) | 63.7        | (60.8-66.5) | 75.2   | (73.3-77.0) |
| 2005-2009         | 73.8    | (72.4-75.0) | 79.5               | (65.7-88.3) | 66.4         | (61.3-71.0) | 72.6    | (70.8-74.3) | 63.8                 | (61.2-66.2) | 65.0        | (62.4-67.6) | 75.9   | (74.1-77.7) |
| 2010-2014         | 72.4    | (70.7-74.0) | 65.9               | (52.3-76.5) | 71.7         | (65.8-76.8) | 77.4    | (75.3-79.3) | 69.5                 | (66.1-72.6) | 71.5        | (68.5-74.4) | 77.5   | (75.2-79.7) |
| abs change*       | 1.3     |             | -5.4               |             | 8.3          |             | 13.7    |             | 13.3                 |             | 10.8        |             | 6.9    |             |

\* Absolute change between 1995-1999 and 2010-2014, † New South Wales (1995-2012), ‡ Ireland (1995-2013)

**Table S4 (cont.). Age-standardized 1-year net survival (in %) and 95% confidence intervals by cancer site, jurisdiction and period of diagnosis**

|                   | UK      |             |                  |             |          |             |       |             |
|-------------------|---------|-------------|------------------|-------------|----------|-------------|-------|-------------|
|                   | England |             | Northern Ireland |             | Scotland |             | Wales |             |
| <b>Oesophagus</b> |         |             |                  |             |          |             |       |             |
| 1995-1999         | 29.6    | (28.9-30.2) | 35.2             | (31.6-38.8) | 31.4     | (29.8-32.9) | 29.2  | (26.9-31.5) |
| 2000-2004         | 36.4    | (35.8-37.0) | 33.3             | (29.7-37.0) | 37.2     | (35.5-38.8) | 38.0  | (35.7-40.3) |
| 2005-2009         | 41.5    | (40.9-42.1) | 41.6             | (38.1-45.0) | 40.3     | (38.5-42.0) | 41.2  | (38.8-43.5) |
| 2010-2014         | 46.6    | (45.9-47.3) | 48.5             | (44.5-52.4) | 44.9     | (42.9-46.8) | 46.4  | (43.4-49.2) |
| abs change*       | 17.0    |             | 13.3             |             | 13.5     |             | 17.2  |             |
| <b>Stomach</b>    |         |             |                  |             |          |             |       |             |
| 1995-1999         | 34.5    | (34.0-35.0) | 36.6             | (33.8-39.4) | 35.9     | (34.3-37.4) | 34.9  | (33.0-36.8) |
| 2000-2004         | 39.4    | (38.8-39.9) | 39.7             | (36.6-42.7) | 38.2     | (36.5-39.8) | 40.1  | (38.0-42.3) |
| 2005-2009         | 44.0    | (43.4-44.6) | 43.1             | (39.8-46.3) | 41.2     | (39.4-42.9) | 41.3  | (38.9-43.5) |
| 2010-2014         | 47.4    | (46.6-48.2) | 45.0             | (41.1-48.9) | 45.0     | (42.8-47.2) | 43.6  | (40.7-46.5) |
| abs change*       | 12.9    |             | 8.4              |             | 9.1      |             | 8.7   |             |
| <b>Colon</b>      |         |             |                  |             |          |             |       |             |
| 1995-1999         | 67.1    | (66.8-67.5) | 73.1             | (71.5-74.7) | 70.9     | (70.0-71.8) | 66.9  | (65.7-68.1) |
| 2000-2004         | 70.6    | (70.3-70.9) | 74.7             | (73.1-76.2) | 73.3     | (72.4-74.2) | 71.0  | (69.8-72.1) |
| 2005-2009         | 74.0    | (73.7-74.3) | 75.1             | (73.7-76.5) | 75.2     | (74.4-76.0) | 71.7  | (70.6-72.8) |
| 2010-2014         | 77.0    | (76.7-77.3) | 80.0             | (78.4-81.5) | 77.4     | (76.5-78.3) | 74.7  | (73.5-75.9) |
| abs change*       | 9.9     |             | 6.9              |             | 6.5      |             | 7.8   |             |
| <b>Rectum</b>     |         |             |                  |             |          |             |       |             |
| 1995-1999         | 72.7    | (72.2-73.1) | 77.7             | (75.0-80.0) | 74.5     | (73.0-75.9) | 73.6  | (71.7-75.4) |
| 2000-2004         | 77.1    | (76.7-77.6) | 77.6             | (75.0-79.9) | 79.6     | (78.3-80.8) | 76.6  | (74.8-78.2) |
| 2005-2009         | 80.4    | (80.0-80.8) | 82.6             | (80.4-84.6) | 81.2     | (80.0-82.4) | 81.0  | (79.5-82.5) |
| 2010-2014         | 84.9    | (84.4-85.3) | 84.6             | (82.1-86.8) | 84.6     | (83.2-85.9) | 84.9  | (83.3-86.4) |
| abs change*       | 12.2    |             | 6.9              |             | 10.1     |             | 11.3  |             |
| <b>Pancreas</b>   |         |             |                  |             |          |             |       |             |
| 1995-1999         | 13.5    | (13.0-14.0) | 12.1             | (9.5-15.1)  | 15.6     | (14.2-17.1) | 14.7  | (12.8-16.6) |
| 2000-2004         | 16.7    | (16.2-17.2) | 12.4             | (9.9-15.0)  | 16.4     | (15.0-17.9) | 16.7  | (14.8-18.6) |
| 2005-2009         | 21.7    | (21.2-22.2) | 17.1             | (14.6-19.9) | 18.9     | (17.4-20.4) | 19.8  | (17.9-21.8) |
| 2010-2014         | 26.7    | (26.1-27.3) | 20.9             | (17.6-24.4) | 24.4     | (22.5-26.3) | 25.6  | (23.4-28.0) |
| abs change*       | 13.2    |             | 8.8              |             | 8.8      |             | 10.9  |             |
| <b>Lung</b>       |         |             |                  |             |          |             |       |             |
| 1995-1999         | 23.8    | (23.5-24.1) | 27.2             | (25.6-28.7) | 26.5     | (25.8-27.2) | 23.9  | (22.9-24.9) |
| 2000-2004         | 27.9    | (27.6-28.2) | 28.8             | (27.3-30.3) | 29.1     | (28.3-29.8) | 27.0  | (26.0-28.0) |
| 2005-2009         | 31.5    | (31.3-31.8) | 31.5             | (30.0-32.9) | 32.3     | (31.6-33.1) | 29.9  | (28.9-31.0) |
| 2010-2014         | 39.2    | (38.9-39.6) | 36.9             | (35.2-38.7) | 38.5     | (37.6-39.4) | 36.8  | (35.5-38.2) |
| abs change*       | 15.4    |             | 9.7              |             | 12.0     |             | 12.9  |             |
| <b>Ovary</b>      |         |             |                  |             |          |             |       |             |
| 1995-1999         | 55.1    | (54.4-55.7) | 58.7             | (54.6-62.5) | 58.7     | (56.8-60.5) | 55.5  | (53.1-57.8) |
| 2000-2004         | 59.9    | (59.3-60.6) | 61.1             | (57.3-64.6) | 60.9     | (59.0-62.7) | 58.7  | (56.3-61.0) |
| 2005-2009         | 64.7    | (64.1-65.3) | 63.5             | (60.0-66.8) | 63.5     | (61.6-65.3) | 61.2  | (58.8-63.5) |
| 2010-2014         | 70.8    | (70.1-71.5) | 66.2             | (62.2-69.9) | 68.5     | (66.3-70.6) | 68.6  | (65.9-71.2) |
| abs change*       | 15.7    |             | 7.5              |             | 9.8      |             | 13.1  |             |

\* Absolute change between 1995-1999 and 2010-2014, † New South Wales (1995-2012), ‡ Ireland (1995-2013)

**Table S5. Age-standardized 5-year net survival (in %) and 95% confidence intervals by cancer site, jurisdiction and period of diagnosis**

|                   | Australia        |             |          |             |                   |             | Canada  |             |                  |             |          |             |               |             |             |             |
|-------------------|------------------|-------------|----------|-------------|-------------------|-------------|---------|-------------|------------------|-------------|----------|-------------|---------------|-------------|-------------|-------------|
|                   | New South Wales† |             | Victoria |             | Western Australia |             | Alberta |             | British Columbia |             | Manitoba |             | New Brunswick |             | Nova Scotia |             |
| <b>Oesophagus</b> |                  |             |          |             |                   |             |         |             |                  |             |          |             |               |             |             |             |
| 1995-1999         | 19.3             | (17.2-21.6) | 17.7     | (15.3-20.2) | 16.2              | (12.7-20.2) | 10.9    | (7.9-14.4)  | 12.1             | (9.8-14.7)  | 12.9     | (8.4-18.3)  | 9.7           | (5.1-16.0)  | 10.9        | (6.6-16.4)  |
| 2000-2004         | 18.1             | (16.1-20.1) | 18.6     | (16.3-20.9) | 14.9              | (11.8-18.3) | 13.4    | (10.4-16.8) | 13.2             | (11.0-15.6) | 8.9      | (5.3-13.7)  | 12.5          | (7.9-18.3)  | 8.7         | (5.4-13.0)  |
| 2005-2009         | 17.4             | (15.5-19.4) | 20.0     | (17.8-22.3) | 18.3              | (14.9-21.9) | 11.4    | (9.1-14.0)  | 16.2             | (13.9-18.7) | 9.5      | (5.9-14.1)  | 12.5          | (8.0-18.1)  | 13.6        | (9.1-19.1)  |
| 2010-2014         | 19.1             | (16.1-22.2) | 26.4     | (23.7-29.3) | 25.2              | (20.7-29.9) | 16.6    | (13.6-19.8) | 19.1             | (16.3-22.2) | 14.4     | (9.1-20.9)  | 15.0          | (9.4-21.7)  | 13.7        | (9.1-19.2)  |
| abs change*       | -0.2             |             | 8.7      |             | 9.0               |             | 5.7     |             | 7.0              |             | 1.5      |             | 5.3           |             | 2.8         |             |
| <b>Stomach</b>    |                  |             |          |             |                   |             |         |             |                  |             |          |             |               |             |             |             |
| 1995-1999         | 27.5             | (25.7-29.2) | 24.0     | (22.1-25.9) | 24.5              | (21.3-27.9) | 20.3    | (17.6-23.1) | 20.6             | (18.4-22.8) | 17.0     | (13.5-20.8) | 20.8          | (16.4-25.6) | 18.8        | (14.9-23.1) |
| 2000-2004         | 29.3             | (27.5-31.1) | 27.4     | (25.5-29.3) | 25.5              | (22.1-29.1) | 21.8    | (19.2-24.5) | 21.9             | (19.7-24.1) | 21.2     | (17.4-25.3) | 21.4          | (16.8-26.4) | 20.5        | (16.5-24.9) |
| 2005-2009         | 28.7             | (27.0-30.5) | 28.9     | (27.0-30.9) | 31.7              | (28.2-35.2) | 23.3    | (20.7-26.0) | 24.0             | (21.8-26.2) | 16.6     | (13.3-20.1) | 25.7          | (21.1-30.6) | 17.7        | (14.0-21.8) |
| 2010-2014         | 30.2             | (27.7-32.8) | 33.5     | (31.2-35.8) | 35.4              | (31.5-39.3) | 25.2    | (22.1-28.4) | 26.5             | (23.9-29.2) | 25.6     | (20.9-30.7) | 29.7          | (23.2-36.5) | 26.7        | (21.3-32.4) |
| abs change*       | 2.7              |             | 9.5      |             | 10.9              |             | 4.9     |             | 5.9              |             | 8.6      |             | 8.9           |             | 7.9         |             |
| <b>Colon</b>      |                  |             |          |             |                   |             |         |             |                  |             |          |             |               |             |             |             |
| 1995-1999         | 61.0             | (59.9-62.0) | 57.8     | (56.6-58.9) | 59.5              | (57.5-61.5) | 55.7    | (53.9-57.5) | 58.1             | (56.7-59.6) | 57.7     | (55.3-60.1) | 58.4          | (55.4-61.2) | 56.2        | (53.6-58.7) |
| 2000-2004         | 64.9             | (64.0-65.8) | 60.7     | (59.6-61.8) | 66.1              | (64.2-67.9) | 59.1    | (57.5-60.7) | 61.5             | (60.2-62.8) | 58.9     | (56.6-61.2) | 62.8          | (60.0-65.5) | 59.8        | (57.5-62.1) |
| 2005-2009         | 67.8             | (66.9-68.6) | 65.4     | (64.3-66.4) | 69.5              | (67.7-71.1) | 63.2    | (61.7-64.7) | 65.5             | (64.2-66.7) | 62.6     | (60.3-64.7) | 65.5          | (62.9-68.0) | 62.8        | (60.5-65.0) |
| 2010-2014         | 71.3             | (70.0-72.4) | 69.2     | (68.1-70.3) | 72.9              | (71.0-74.6) | 65.6    | (63.9-67.2) | 66.0             | (64.7-67.3) | 64.2     | (61.6-66.7) | 68.3          | (65.2-71.2) | 62.4        | (59.8-64.9) |
| abs change*       | 10.3             |             | 11.4     |             | 13.4              |             | 9.9     |             | 7.9              |             | 6.5      |             | 9.9           |             | 6.2         |             |
| <b>Rectum</b>     |                  |             |          |             |                   |             |         |             |                  |             |          |             |               |             |             |             |
| 1995-1999         | 60.5             | (58.8-62.2) | 58.3     | (56.4-60.2) | 56.4              | (52.9-59.8) | 57.0    | (53.8-60.1) | 59.9             | (57.5-62.2) | 55.8     | (51.4-59.9) | 58.9          | (52.7-64.7) | 51.5        | (46.7-56.0) |
| 2000-2004         | 64.5             | (62.9-66.0) | 63.7     | (62.0-65.4) | 63.6              | (60.5-66.5) | 62.1    | (59.3-64.8) | 61.4             | (59.2-63.6) | 58.5     | (54.3-62.4) | 60.5          | (54.2-66.2) | 62.6        | (58.1-66.8) |
| 2005-2009         | 67.4             | (65.9-68.9) | 69.3     | (67.7-70.9) | 70.3              | (67.4-73.0) | 64.5    | (61.9-67.0) | 62.6             | (60.6-64.6) | 63.7     | (59.7-67.4) | 65.5          | (60.2-70.3) | 62.8        | (58.8-66.6) |
| 2010-2014         | 68.7             | (66.6-70.6) | 72.1     | (70.3-73.9) | 71.9              | (68.7-74.9) | 65.1    | (62.3-67.8) | 67.3             | (65.1-69.4) | 65.0     | (60.8-68.9) | 67.7          | (62.3-72.4) | 60.5        | (55.7-65.0) |
| abs change*       | 8.2              |             | 13.8     |             | 15.5              |             | 8.1     |             | 7.4              |             | 9.2      |             | 8.8           |             | 9.0         |             |
| <b>Pancreas</b>   |                  |             |          |             |                   |             |         |             |                  |             |          |             |               |             |             |             |
| 1995-1999         | 6.3              | (5.3-7.4)   | 5.9      | (4.8-7.2)   | 7.6               | (5.7-9.9)   | 4.7     | (3.4-6.2)   | 4.7              | (3.7-5.9)   | 4.5      | (2.8-6.9)   | 4.3           | (2.4-6.9)   | 6.2         | (4.0-8.9)   |
| 2000-2004         | 7.6              | (6.6-8.8)   | 8.0      | (6.9-9.3)   | 7.5               | (5.6-9.7)   | 5.2     | (4.0-6.6)   | 5.2              | (4.2-6.3)   | 3.1      | (1.8-5.1)   | 6.2           | (4.0-9.1)   | 3.3         | (1.8-5.4)   |
| 2005-2009         | 9.5              | (8.5-10.6)  | 8.5      | (7.3-9.7)   | 10.2              | (8.3-12.3)  | 6.8     | (5.5-8.2)   | 8.6              | (7.3-10.0)  | 5.1      | (3.4-7.2)   | 4.4           | (2.7-6.7)   | 5.8         | (4.0-8.1)   |
| 2010-2014         | 14.1             | (12.4-15.9) | 13.7     | (12.1-15.4) | 15.2              | (12.7-18.0) | 10.3    | (8.6-12.2)  | 10.6             | (9.1-12.1)  | 13.1     | (10.0-16.5) | 7.6           | (5.2-10.7)  | 7.1         | (4.9-9.8)   |
| abs change*       | 7.8              |             | 7.8      |             | 7.6               |             | 5.6     |             | 5.9              |             | 8.6      |             | 3.3           |             | 0.9         |             |
| <b>Lung</b>       |                  |             |          |             |                   |             |         |             |                  |             |          |             |               |             |             |             |
| 1995-1999         | 13.7             | (13.0-14.4) | 13.2     | (12.4-14.0) | 12.7              | (11.5-14.0) | 13.1    | (12.2-14.1) | 13.7             | (13.0-14.4) | 15.5     | (14.1-16.9) | 14.2          | (12.7-15.8) | 14.7        | (13.3-16.0) |
| 2000-2004         | 15.6             | (14.9-16.3) | 14.1     | (13.4-14.9) | 14.7              | (13.4-16.0) | 13.1    | (12.3-14.0) | 14.5             | (13.8-15.3) | 18.9     | (17.4-20.4) | 15.8          | (14.3-17.4) | 14.8        | (13.5-16.2) |
| 2005-2009         | 17.1             | (16.4-17.8) | 17.5     | (16.7-18.3) | 17.7              | (16.4-19.0) | 16.3    | (15.4-17.3) | 18.3             | (17.5-19.1) | 20.2     | (18.8-21.7) | 17.2          | (15.8-18.8) | 16.9        | (15.5-18.3) |
| 2010-2014         | 19.9             | (18.9-20.9) | 22.4     | (21.4-23.4) | 21.4              | (19.9-23.0) | 20.9    | (19.8-22.0) | 21.3             | (20.2-22.3) | 22.7     | (20.9-24.5) | 24.9          | (22.1-27.8) | 19.3        | (17.6-21.1) |
| abs change*       | 6.2              |             | 9.2      |             | 8.7               |             | 7.8     |             | 7.6              |             | 7.2      |             | 10.7          |             | 4.6         |             |
| <b>Ovary</b>      |                  |             |          |             |                   |             |         |             |                  |             |          |             |               |             |             |             |
| 1995-1999         | 34.8             | (32.5-37.1) | 36.7     | (34.1-39.4) | 34.5              | (29.7-39.3) | 30.2    | (26.8-33.7) | 33.6             | (30.9-36.3) | 32.6     | (27.7-37.6) | 29.4          | (22.6-36.5) | 37.3        | (31.3-43.4) |
| 2000-2004         | 37.2             | (34.9-39.5) | 34.9     | (32.4-37.4) | 36.5              | (32.3-40.8) | 30.7    | (27.5-33.9) | 35.1             | (32.5-37.8) | 31.2     | (26.7-35.8) | 31.8          | (26.2-37.6) | 33.3        | (27.7-38.9) |
| 2005-2009         | 39.5             | (37.2-41.7) | 39.8     | (37.4-42.2) | 43.4              | (39.2-47.6) | 34.8    | (31.5-38.1) | 37.6             | (35.1-40.2) | 38.0     | (33.1-42.9) | 34.1          | (28.2-40.1) | 36.3        | (30.9-41.7) |
| 2010-2014         | 41.7             | (38.6-44.7) | 42.8     | (39.9-45.7) | 47.6              | (42.8-52.2) | 36.4    | (32.7-40.1) | 38.6             | (35.8-41.4) | 43.6     | (37.0-50.0) | 38.7          | (32.0-45.3) | 38.5        | (32.4-44.5) |
| abs change*       | 6.9              |             | 6.1      |             | 13.1              |             | 6.2     |             | 5.0              |             | 11.0     |             | 9.3           |             | 1.2         |             |

\* Absolute change between 1995-1999 and 2010-2014, † New South Wales (1995-2012), ‡ Ireland (1995-2013)

**Table S5 (cont.). Age-standardized 5-year net survival (in %) and 95% confidence intervals by cancer site, jurisdiction and period of diagnosis**

|                   | Canada  |             |                    |             |              |             |         |             |          |             |             |             |        |             |
|-------------------|---------|-------------|--------------------|-------------|--------------|-------------|---------|-------------|----------|-------------|-------------|-------------|--------|-------------|
|                   | Ontario |             | Prince Edward Isl. |             | Saskatchewan |             | Denmark |             | Ireland‡ |             | New Zealand |             | Norway |             |
| <b>Oesophagus</b> |         |             |                    |             |              |             |         |             |          |             |             |             |        |             |
| 1995-1999         | 15.3    | (13.7-16.9) | 3.5                | (0.3-14.6)  | 8.7          | (4.9-13.8)  | 5.1     | (3.9-6.6)   | 10.9     | (9.1-12.9)  | 13.6        | (11.2-16.1) | 8.7    | (6.7-11.0)  |
| 2000-2004         | 16.2    | (14.7-17.8) | 16.9               | (6.1-32.3)  | 10.5         | (4.7-19.2)  | 8.6     | (7.2-10.1)  | 12.8     | (11.0-14.7) | 11.6        | (9.6-13.9)  | 9.0    | (6.8-11.6)  |
| 2005-2009         | 16.2    | (14.8-17.7) | 10.0               | (3.0-21.8)  | 10.6         | (6.7-15.4)  | 10.5    | (9.0-12.0)  | 17.2     | (15.3-19.2) | 14.3        | (12.1-16.6) | 13.2   | (10.8-15.7) |
| 2010-2014         | 16.5    | (14.7-18.3) | 19.1               | (9.2-31.7)  | 10.2         | (5.7-16.2)  | 14.7    | (12.1-17.5) | 21.9     | (19.3-24.5) | 16.9        | (14.3-19.7) | 19.4   | (16.5-22.5) |
| abs change*       | 1.2     |             | 15.6               |             | 1.5          |             | 9.6     |             | 11.0     |             | 3.3         |             | 10.7   |             |
| <b>Stomach</b>    |         |             |                    |             |              |             |         |             |          |             |             |             |        |             |
| 1995-1999         | 23.5    | (22.1-24.8) | 16.1               | (7.3-28.0)  | 16.7         | (13.0-20.8) | 14.0    | (12.5-15.7) | 17.3     | (15.5-19.1) | 21.3        | (19.2-23.4) | 21.3   | (19.5-23.1) |
| 2000-2004         | 26.4    | (25.1-27.7) | 22.5               | (10.9-36.7) | 19.0         | (14.8-23.8) | 15.2    | (13.7-16.9) | 18.5     | (16.7-20.4) | 23.7        | (21.6-25.9) | 22.0   | (20.2-23.9) |
| 2005-2009         | 29.9    | (28.6-31.2) | 13.1               | (5.3-24.5)  | 19.4         | (15.3-23.8) | 15.7    | (14.2-17.3) | 22.0     | (20.2-23.9) | 24.0        | (21.9-26.2) | 25.1   | (23.1-27.2) |
| 2010-2014         | 32.7    | (31.1-34.4) | 16.5               | (6.7-30.2)  | 25.9         | (20.8-31.2) | 22.6    | (20.6-24.8) | 28.4     | (26.1-30.9) | 24.5        | (22.1-27.0) | 26.9   | (24.6-29.3) |
| abs change*       | 9.2     |             | 0.4                |             | 9.2          |             | 8.6     |             | 11.1     |             | 3.2         |             | 5.6    |             |
| <b>Colon</b>      |         |             |                    |             |              |             |         |             |          |             |             |             |        |             |
| 1995-1999         | 58.2    | (57.4-59.0) | 55.9               | (48.8-62.4) | 59.6         | (56.8-62.3) | 49.1    | (47.9-50.3) | 50.0     | (48.5-51.6) | 59.3        | (58.0-60.6) | 55.7   | (54.4-57.0) |
| 2000-2004         | 62.1    | (61.3-62.8) | 56.7               | (49.9-62.9) | 60.2         | (57.6-62.6) | 53.2    | (52.0-54.3) | 52.7     | (51.3-54.2) | 60.3        | (59.1-61.5) | 58.0   | (56.8-59.1) |
| 2005-2009         | 66.6    | (65.9-67.3) | 60.0               | (53.6-65.9) | 62.4         | (59.9-64.9) | 57.5    | (56.4-58.6) | 58.0     | (56.7-59.3) | 61.6        | (60.4-62.8) | 62.2   | (61.1-63.3) |
| 2010-2014         | 68.3    | (67.4-69.1) | 60.1               | (54.0-65.7) | 65.4         | (62.7-68.0) | 65.7    | (64.5-66.9) | 61.8     | (60.2-63.3) | 62.1        | (60.8-63.4) | 65.4   | (64.2-66.5) |
| abs change*       | 10.1    |             | 4.2                |             | 5.8          |             | 16.6    |             | 11.8     |             | 2.8         |             | 9.7    |             |
| <b>Rectum</b>     |         |             |                    |             |              |             |         |             |          |             |             |             |        |             |
| 1995-1999         | 58.2    | (56.6-59.7) | 42.8               | (30.5-54.5) | 53.4         | (48.8-57.9) | 48.1    | (46.4-49.8) | 47.6     | (45.1-50.0) | 56.3        | (54.0-58.6) | 57.3   | (55.5-59.1) |
| 2000-2004         | 62.1    | (60.7-63.5) | 49.6               | (39.0-59.3) | 60.5         | (56.0-64.8) | 54.0    | (52.3-55.7) | 51.0     | (48.8-53.2) | 59.7        | (57.5-61.8) | 61.5   | (59.8-63.2) |
| 2005-2009         | 67.2    | (65.9-68.4) | 75.4               | (63.3-84.0) | 63.3         | (59.1-67.1) | 60.7    | (59.2-62.1) | 57.1     | (54.9-59.2) | 62.4        | (60.4-64.4) | 65.4   | (63.7-67.0) |
| 2010-2014         | 68.6    | (67.0-70.1) | 68.5               | (58.0-76.9) | 66.5         | (61.9-70.7) | 69.1    | (67.4-70.8) | 62.4     | (59.9-64.9) | 65.4        | (63.1-67.5) | 68.8   | (66.9-70.6) |
| abs change*       | 10.4    |             | 25.7               |             | 13.1         |             | 21.0    |             | 14.8     |             | 9.1         |             | 11.5   |             |
| <b>Pancreas</b>   |         |             |                    |             |              |             |         |             |          |             |             |             |        |             |
| 1995-1999         | 9.2     | (8.4-10.2)  | 3.3                | (0.6-10.0)  | 2.9          | (1.4-5.2)   | 3.2     | (2.5-4.0)   | 5.6      | (4.4-7.0)   | 8.8         | (7.3-10.6)  | 4.4    | (3.5-5.5)   |
| 2000-2004         | 10.7    | (9.8-11.6)  | 7.6                | (2.7-16.0)  | 5.4          | (3.4-8.1)   | 3.8     | (3.1-4.6)   | 5.9      | (4.7-7.3)   | 6.9         | (5.6-8.5)   | 4.7    | (3.8-5.7)   |
| 2005-2009         | 12.2    | (11.3-13.1) | 1.1                | (0.1-6.6)   | 5.6          | (3.8-8.0)   | 5.7     | (4.9-6.5)   | 7.0      | (5.8-8.4)   | 7.3         | (6.1-8.7)   | 5.9    | (5.0-7.0)   |
| 2010-2014         | 12.2    | (11.2-13.3) | 10.0               | (5.1-17.0)  | 10.0         | (7.1-13.4)  | 9.6     | (8.5-10.9)  | 9.6      | (7.8-11.6)  | 8.2         | (6.8-9.7)   | 9.9    | (8.5-11.4)  |
| abs change*       | 3.0     |             | 6.7                |             | 7.1          |             | 6.4     |             | 4.0      |             | -0.6        |             | 5.5    |             |
| <b>Lung</b>       |         |             |                    |             |              |             |         |             |          |             |             |             |        |             |
| 1995-1999         | 16.7    | (16.3-17.2) | 13.9               | (10.9-17.4) | 14.2         | (12.7-15.7) | 8.2     | (7.7-8.7)   | 9.3      | (8.5-10.1)  | 11.5        | (10.7-12.4) | 10.8   | (10.1-11.6) |
| 2000-2004         | 17.2    | (16.7-17.6) | 10.2               | (7.5-13.4)  | 15.2         | (13.7-16.8) | 9.7     | (9.2-10.2)  | 10.1     | (9.3-10.9)  | 10.9        | (10.2-11.7) | 11.8   | (11.1-12.5) |
| 2005-2009         | 19.3    | (18.9-19.8) | 13.6               | (9.5-18.4)  | 16.2         | (14.6-17.8) | 12.4    | (11.9-13.0) | 13.4     | (12.7-14.2) | 11.9        | (11.1-12.7) | 15.4   | (14.7-16.2) |
| 2010-2014         | 22.3    | (21.6-22.9) | 13.1               | (9.7-17.1)  | 20.6         | (18.6-22.6) | 18.9    | (18.1-19.6) | 19.8     | (18.7-20.9) | 15.5        | (14.5-16.5) | 20.4   | (19.4-21.4) |
| abs change*       | 5.6     |             | -0.8               |             | 6.4          |             | 10.7    |             | 10.5     |             | 4.0         |             | 9.6    |             |
| <b>Ovary</b>      |         |             |                    |             |              |             |         |             |          |             |             |             |        |             |
| 1995-1999         | 38.4    | (36.7-40.0) | 37.2               | (21.8-52.6) | 28.7         | (23.9-33.7) | 32.0    | (30.0-33.9) | 27.8     | (25.2-30.5) | 31.9        | (29.0-34.8) | 37.0   | (34.8-39.3) |
| 2000-2004         | 39.2    | (37.7-40.7) | 33.2               | (19.0-48.2) | 32.4         | (27.3-37.6) | 34.2    | (32.3-36.1) | 29.6     | (27.2-32.1) | 33.5        | (30.7-36.4) | 40.6   | (38.4-42.8) |
| 2005-2009         | 42.3    | (40.8-43.8) | 41.4               | (25.3-56.7) | 39.9         | (34.5-45.2) | 38.3    | (36.3-40.2) | 31.1     | (28.7-33.5) | 32.7        | (30.0-35.4) | 41.3   | (39.1-43.5) |
| 2010-2014         | 42.2    | (40.3-44.0) | 36.8               | (25.4-48.2) | 41.2         | (35.2-47.1) | 42.1    | (39.8-44.5) | 36.0     | (33.0-38.9) | 36.3        | (33.3-39.4) | 46.2   | (43.6-48.8) |
| abs change*       | 3.8     |             | -0.4               |             | 12.5         |             | 10.1    |             | 8.2      |             | 4.4         |             | 9.2    |             |

\* Absolute change between 1995-1999 and 2010-2014, † New South Wales (1995-2012), ‡ Ireland (1995-2013)

**Table S5 (cont.). Age-standardized 5-year net survival (in %) and 95% confidence intervals by cancer site, jurisdiction and period of diagnosis**

|                   | UK      |             |                  |             |          |             |       |             |
|-------------------|---------|-------------|------------------|-------------|----------|-------------|-------|-------------|
|                   | England |             | Northern Ireland |             | Scotland |             | Wales |             |
| <b>Oesophagus</b> |         |             |                  |             |          |             |       |             |
| 1995-1999         | 8.2     | (7.8-8.6)   | 11.2             | (8.7-14.1)  | 9.5      | (8.4-10.7)  | 11.4  | (9.7-13.1)  |
| 2000-2004         | 11.5    | (11.0-11.9) | 12.5             | (9.9-15.5)  | 10.1     | (8.9-11.3)  | 12.6  | (11.0-14.4) |
| 2005-2009         | 14.0    | (13.5-14.5) | 17.3             | (14.5-20.2) | 12.2     | (11.0-13.5) | 12.2  | (10.6-13.8) |
| 2010-2014         | 16.5    | (15.9-17.0) | 19.1             | (15.7-22.7) | 13.7     | (12.1-15.3) | 14.9  | (12.7-17.2) |
| abs change*       | 8.3     |             | 7.9              |             | 4.2      |             | 3.5   |             |
| <b>Stomach</b>    |         |             |                  |             |          |             |       |             |
| 1995-1999         | 13.9    | (13.4-14.3) | 18.0             | (15.6-20.5) | 14.2     | (13.0-15.5) | 14.3  | (12.8-15.9) |
| 2000-2004         | 16.0    | (15.6-16.5) | 16.8             | (14.4-19.4) | 15.6     | (14.3-17.0) | 16.7  | (15.0-18.5) |
| 2005-2009         | 19.3    | (18.7-19.8) | 19.8             | (17.0-22.7) | 17.2     | (15.8-18.7) | 18.2  | (16.2-20.2) |
| 2010-2014         | 21.2    | (20.5-21.8) | 21.2             | (18.1-24.5) | 19.9     | (18.0-21.8) | 17.4  | (15.2-19.8) |
| abs change*       | 7.3     |             | 3.2              |             | 5.7      |             | 3.1   |             |
| <b>Colon</b>      |         |             |                  |             |          |             |       |             |
| 1995-1999         | 46.5    | (46.1-46.9) | 52.9             | (50.7-55.0) | 50.0     | (48.9-51.2) | 46.3  | (44.8-47.7) |
| 2000-2004         | 50.7    | (50.3-51.0) | 53.9             | (51.8-56.0) | 53.0     | (51.8-54.1) | 51.0  | (49.5-52.5) |
| 2005-2009         | 55.4    | (55.0-55.7) | 56.9             | (55.0-58.8) | 56.1     | (55.0-57.2) | 52.6  | (51.2-54.0) |
| 2010-2014         | 58.9    | (58.5-59.3) | 62.5             | (60.4-64.5) | 59.7     | (58.5-60.9) | 56.7  | (55.2-58.3) |
| abs change*       | 12.4    |             | 9.6              |             | 9.7      |             | 10.4  |             |
| <b>Rectum</b>     |         |             |                  |             |          |             |       |             |
| 1995-1999         | 47.6    | (47.0-48.2) | 47.4             | (43.9-50.8) | 49.7     | (47.8-51.6) | 49.0  | (46.5-51.4) |
| 2000-2004         | 53.0    | (52.4-53.5) | 50.8             | (47.5-54.1) | 55.4     | (53.6-57.2) | 51.2  | (48.9-53.5) |
| 2005-2009         | 56.9    | (56.4-57.5) | 55.8             | (52.6-58.9) | 58.3     | (56.5-60.0) | 57.4  | (55.2-59.6) |
| 2010-2014         | 62.2    | (61.5-62.8) | 60.6             | (57.1-63.9) | 62.9     | (60.9-64.8) | 60.8  | (58.4-63.1) |
| abs change*       | 14.6    |             | 13.2             |             | 13.2     |             | 11.8  |             |
| <b>Pancreas</b>   |         |             |                  |             |          |             |       |             |
| 1995-1999         | 3.2     | (2.9-3.5)   | 2.8              | (1.5-4.7)   | 3.5      | (2.8-4.4)   | 4.2   | (3.2-5.4)   |
| 2000-2004         | 4.1     | (3.8-4.4)   | 2.5              | (1.4-4.3)   | 3.4      | (2.7-4.3)   | 4.8   | (3.7-6.0)   |
| 2005-2009         | 5.7     | (5.4-6.0)   | 5.7              | (4.1-7.7)   | 4.0      | (3.2-4.9)   | 4.8   | (3.8-6.0)   |
| 2010-2014         | 8.1     | (7.7-8.5)   | 6.7              | (4.8-9.1)   | 7.1      | (5.9-8.4)   | 7.4   | (5.9-9.2)   |
| abs change*       | 4.9     |             | 3.9              |             | 3.6      |             | 3.2   |             |
| <b>Lung</b>       |         |             |                  |             |          |             |       |             |
| 1995-1999         | 7.0     | (6.9-7.2)   | 9.4              | (8.4-10.5)  | 7.4      | (7.0-7.8)   | 8.3   | (7.6-9.1)   |
| 2000-2004         | 8.3     | (8.1-8.5)   | 10.2             | (9.1-11.3)  | 8.1      | (7.6-8.5)   | 8.3   | (7.6-9.0)   |
| 2005-2009         | 10.0    | (9.8-10.2)  | 10.9             | (9.9-12.0)  | 10.1     | (9.6-10.6)  | 9.1   | (8.4-9.8)   |
| 2010-2014         | 15.0    | (14.7-15.2) | 13.5             | (12.2-14.8) | 14.1     | (13.5-14.8) | 14.0  | (12.9-15.0) |
| abs change*       | 8.0     |             | 4.1              |             | 6.7      |             | 5.7   |             |
| <b>Ovary</b>      |         |             |                  |             |          |             |       |             |
| 1995-1999         | 26.8    | (26.2-27.4) | 32.8             | (28.9-36.7) | 30.1     | (28.2-31.9) | 29.1  | (26.8-31.4) |
| 2000-2004         | 29.1    | (28.5-29.7) | 29.6             | (26.2-33.1) | 27.0     | (25.3-28.8) | 30.7  | (28.4-33.1) |
| 2005-2009         | 32.5    | (31.9-33.1) | 32.1             | (28.7-35.6) | 29.9     | (28.1-31.8) | 30.7  | (28.3-33.1) |
| 2010-2014         | 37.8    | (37.0-38.5) | 34.9             | (30.9-38.9) | 33.5     | (31.3-35.7) | 34.9  | (32.2-37.7) |
| abs change*       | 11.0    |             | 2.1              |             | 3.4      |             | 5.8   |             |

\* Absolute change between 1995-1999 and 2010-2014, † New South Wales (1995-2012), ‡ Ireland (1995-2013)

**Table S6. Age-standardized 1-year net survival (in %) and 95% confidence intervals by cancer site, country and period of diagnosis, including DCO cases**

|                   | Australia <sup>†</sup> |             | Canada <sup>‡</sup> |             | Denmark |             | Ireland <sup>¶</sup> |             | New Zealand |             | Norway |             | UK   |             |
|-------------------|------------------------|-------------|---------------------|-------------|---------|-------------|----------------------|-------------|-------------|-------------|--------|-------------|------|-------------|
| <b>Oesophagus</b> |                        |             |                     |             |         |             |                      |             |             |             |        |             |      |             |
| 1995-1999         | 42.4                   | (40.5-44.2) | 37.9                | (36.5-39.4) | 26.9    | (24.6-29.2) | 30.3                 | (27.8-32.8) | 29.3        | (26.2-32.5) | 27.6   | (24.4-31.0) | 29.5 | (29.0-30.1) |
| 2000-2004         | 43.3                   | (41.6-45.0) | 39.2                | (37.9-40.6) | 29.5    | (27.3-31.7) | 36.2                 | (33.7-38.6) | 34.8        | (31.7-37.8) | 33.3   | (30.0-36.7) | 36.1 | (35.6-36.7) |
| 2005-2009         | 47.2                   | (45.6-48.8) | 40.3                | (39.0-41.6) | 33.6    | (31.4-35.8) | 43.2                 | (40.8-45.6) | 39.9        | (36.9-42.7) | 40.8   | (37.6-44.0) | 41.0 | (40.5-41.5) |
| 2010-2014         | 51.6                   | (49.3-53.8) | 43.1                | (41.6-44.6) | 44.4    | (41.4-47.4) | 49.7                 | (46.3-52.9) | 43.9        | (40.6-47.2) | 46.9   | (43.5-50.2) | 46.1 | (45.4-46.7) |
| abs change*       | 9.2                    |             | 5.2                 |             | 17.5    |             | 19.4                 |             | 14.6        |             | 19.3   |             | 16.6 |             |
| <b>Stomach</b>    |                        |             |                     |             |         |             |                      |             |             |             |        |             |      |             |
| 1995-1999         | 50.2                   | (48.9-51.4) | 44.5                | (43.5-45.5) | 36.3    | (34.4-38.3) | 32.4                 | (30.4-34.4) | 39.8        | (37.5-42.0) | 42.5   | (40.5-44.4) | 34.2 | (33.7-34.7) |
| 2000-2004         | 52.4                   | (51.1-53.7) | 46.7                | (45.7-47.7) | 37.6    | (35.6-39.6) | 37.6                 | (35.6-39.7) | 42.1        | (39.8-44.4) | 47.1   | (45.1-49.1) | 38.8 | (38.3-39.3) |
| 2005-2009         | 54.9                   | (53.6-56.1) | 48.9                | (48.0-49.9) | 43.5    | (41.6-45.5) | 46.8                 | (44.7-48.8) | 45.5        | (43.2-47.9) | 50.7   | (48.6-52.8) | 43.0 | (42.4-43.5) |
| 2010-2014         | 58.9                   | (57.3-60.6) | 52.2                | (51.0-53.4) | 52.5    | (50.1-54.8) | 52.2                 | (49.4-54.9) | 48.8        | (46.0-51.6) | 53.0   | (50.4-55.5) | 46.3 | (45.5-47.0) |
| abs change*       | 8.7                    |             | 7.7                 |             | 16.2    |             | 19.8                 |             | 9.0         |             | 10.5   |             | 12.1 |             |
| <b>Colon</b>      |                        |             |                     |             |         |             |                      |             |             |             |        |             |      |             |
| 1995-1999         | 78.4                   | (77.9-78.9) | 76.9                | (76.5-77.3) | 70.7    | (69.7-71.6) | 69.1                 | (67.8-70.3) | 75.9        | (75.0-76.9) | 75.8   | (74.8-76.7) | 66.9 | (66.6-67.2) |
| 2000-2004         | 81.2                   | (80.7-81.7) | 79.7                | (79.3-80.0) | 72.8    | (71.9-73.6) | 70.9                 | (69.8-72.0) | 77.9        | (77.0-78.8) | 77.2   | (76.3-78.0) | 70.1 | (69.9-70.4) |
| 2005-2009         | 83.9                   | (83.5-84.3) | 82.0                | (81.6-82.3) | 75.8    | (75.0-76.6) | 77.8                 | (76.8-78.7) | 78.6        | (77.7-79.5) | 79.7   | (78.9-80.5) | 73.2 | (73.0-73.5) |
| 2010-2014         | 86.3                   | (85.7-86.8) | 82.8                | (82.4-83.2) | 82.5    | (81.7-83.3) | 80.2                 | (78.9-81.4) | 80.7        | (79.7-81.6) | 82.0   | (81.1-82.8) | 76.4 | (76.1-76.6) |
| abs change*       | 7.9                    |             | 5.9                 |             | 11.8    |             | 11.1                 |             | 4.8         |             | 6.2    |             | 9.5  |             |
| <b>Rectum</b>     |                        |             |                     |             |         |             |                      |             |             |             |        |             |      |             |
| 1995-1999         | 82.2                   | (81.3-83.0) | 82.5                | (81.8-83.2) | 75.4    | (74.2-76.7) | 72.6                 | (70.7-74.4) | 79.1        | (77.4-80.7) | 80.9   | (79.6-82.1) | 72.4 | (72.0-72.8) |
| 2000-2004         | 85.5                   | (84.8-86.1) | 84.3                | (83.7-84.9) | 78.9    | (77.8-80.0) | 75.4                 | (73.7-77.1) | 82.2        | (80.7-83.6) | 82.6   | (81.5-83.7) | 76.7 | (76.3-77.1) |
| 2005-2009         | 87.5                   | (86.9-88.2) | 85.8                | (85.2-86.4) | 82.6    | (81.6-83.5) | 81.3                 | (79.7-82.7) | 83.4        | (82.1-84.7) | 85.8   | (84.7-86.8) | 79.9 | (79.6-80.3) |
| 2010-2014         | 89.3                   | (88.4-90.1) | 86.2                | (85.5-86.9) | 87.6    | (86.5-88.5) | 86.2                 | (84.3-87.9) | 85.6        | (84.1-86.9) | 88.9   | (87.7-90.0) | 84.3 | (83.9-84.7) |
| abs change*       | 7.1                    |             | 3.7                 |             | 12.2    |             | 13.6                 |             | 6.5         |             | 8.0    |             | 11.9 |             |
| <b>Pancreas</b>   |                        |             |                     |             |         |             |                      |             |             |             |        |             |      |             |
| 1995-1999         | 21.1                   | (19.9-22.3) | 19.5                | (18.7-20.4) | 14.3    | (13.0-15.7) | 13.2                 | (11.4-15.1) | 19.2        | (17.2-21.3) | 15.6   | (14.1-17.3) | 13.4 | (13.0-13.8) |
| 2000-2004         | 25.9                   | (24.8-27.1) | 23.1                | (22.3-23.9) | 17.5    | (16.2-18.8) | 17.1                 | (15.2-19.1) | 19.0        | (17.1-21.1) | 18.8   | (17.2-20.4) | 16.0 | (15.6-16.5) |
| 2005-2009         | 29.2                   | (28.1-30.2) | 25.9                | (25.1-26.7) | 21.7    | (20.4-23.1) | 22.8                 | (20.9-24.7) | 19.9        | (18.1-21.8) | 24.8   | (23.2-26.5) | 20.6 | (20.2-21.1) |
| 2010-2014         | 39.5                   | (38.0-40.9) | 31.0                | (30.1-32.0) | 30.8    | (29.1-32.6) | 31.0                 | (28.1-34.0) | 24.6        | (22.5-26.7) | 30.1   | (28.2-32.1) | 25.7 | (25.2-26.3) |
| abs change*       | 18.4                   |             | 11.5                |             | 16.5    |             | 17.8                 |             | 5.4         |             | 14.5   |             | 12.3 |             |
| <b>Lung</b>       |                        |             |                     |             |         |             |                      |             |             |             |        |             |      |             |
| 1995-1999         | 37.3                   | (36.7-38.0) | 37.5                | (37.1-37.9) | 27.2    | (26.5-28.0) | 24.6                 | (23.6-25.7) | 30.3        | (29.2-31.4) | 31.2   | (30.2-32.2) | 23.7 | (23.5-23.9) |
| 2000-2004         | 39.7                   | (39.1-40.4) | 39.1                | (38.7-39.5) | 33.2    | (32.5-34.0) | 27.7                 | (26.6-28.7) | 31.2        | (30.2-32.3) | 33.5   | (32.5-34.4) | 27.4 | (27.2-27.7) |
| 2005-2009         | 43.0                   | (42.4-43.6) | 41.6                | (41.2-42.0) | 36.2    | (35.5-37.0) | 34.0                 | (33.0-35.0) | 32.6        | (31.5-33.6) | 39.9   | (39.0-40.9) | 31.0 | (30.7-31.2) |
| 2010-2014         | 48.2                   | (47.4-49.0) | 46.5                | (46.0-46.9) | 45.9    | (45.0-46.9) | 44.8                 | (43.4-46.2) | 39.4        | (38.1-40.6) | 46.0   | (44.9-47.2) | 38.4 | (38.1-38.7) |
| abs change*       | 10.9                   |             | 9.0                 |             | 18.7    |             | 20.2                 |             | 9.1         |             | 14.8   |             | 14.7 |             |
| <b>Ovary</b>      |                        |             |                     |             |         |             |                      |             |             |             |        |             |      |             |
| 1995-1999         | 69.8                   | (68.2-71.3) | 69.1                | (68.1-70.2) | 63.5    | (61.5-65.4) | 55.0                 | (52.2-57.7) | 60.6        | (57.6-63.5) | 70.1   | (68.1-72.1) | 54.8 | (54.3-55.4) |
| 2000-2004         | 72.2                   | (70.8-73.6) | 70.9                | (69.9-71.9) | 68.5    | (66.6-70.3) | 58.4                 | (55.8-60.9) | 63.1        | (60.2-65.8) | 74.9   | (73.1-76.7) | 58.9 | (58.3-59.4) |
| 2005-2009         | 74.0                   | (72.7-75.3) | 72.1                | (71.2-73.1) | 72.4    | (70.6-74.1) | 63.1                 | (60.6-65.5) | 64.6        | (62.0-67.2) | 75.2   | (73.3-77.0) | 63.4 | (62.9-64.0) |
| 2010-2014         | 77.4                   | (75.6-79.1) | 71.8                | (70.6-72.9) | 76.9    | (74.9-78.9) | 69.2                 | (65.8-72.3) | 71.2        | (68.1-74.0) | 76.6   | (74.2-78.7) | 69.4 | (68.7-70.0) |
| abs change*       | 7.6                    |             | 2.7                 |             | 13.4    |             | 14.2                 |             | 10.6        |             | 6.5    |             | 14.6 |             |

\* Absolute change between 1995-1999 and 2010-2014

<sup>†</sup> Australia includes New South Wales (1995-2012), Victoria and Western Australia<sup>‡</sup> Canada includes Alberta, British Columbia, Manitoba, New Brunswick, Nova Scotia, Ontario, Prince Edward Island and Saskatchewan<sup>¶</sup> Ireland (1995-2013)



**Table S7. Age-standardized 5-year net survival (in %) and 95% confidence intervals by cancer site, country and period of diagnosis, including DCO cases**

|                   | Australia <sup>†</sup> |             | Canada <sup>‡</sup> |             | Denmark |             | Ireland <sup>¶</sup> |             | New Zealand |             | Norway |             | UK   |             |
|-------------------|------------------------|-------------|---------------------|-------------|---------|-------------|----------------------|-------------|-------------|-------------|--------|-------------|------|-------------|
| <b>Oesophagus</b> |                        |             |                     |             |         |             |                      |             |             |             |        |             |      |             |
| 1995-1999         | 18.2                   | (16.8-19.8) | 13.3                | (12.2-14.5) | 5.1     | (3.9-6.6)   | 10.7                 | (9.0-12.7)  | 13.5        | (11.1-16.1) | 8.6    | (6.6-10.9)  | 8.5  | (8.2-8.9)   |
| 2000-2004         | 17.6                   | (16.3-19.0) | 14.1                | (13.0-15.1) | 8.5     | (7.2-10.1)  | 12.7                 | (10.9-14.6) | 11.5        | (9.5-13.8)  | 9.0    | (6.7-11.6)  | 11.3 | (10.9-11.7) |
| 2005-2009         | 18.3                   | (17.0-19.7) | 14.6                | (13.6-15.6) | 10.5    | (9.0-12.0)  | 17.1                 | (15.2-19.1) | 14.2        | (12.1-16.5) | 13.1   | (10.8-15.7) | 13.7 | (13.3-14.1) |
| 2010-2014         | 23.3                   | (21.5-25.2) | 16.1                | (14.9-17.3) | 14.7    | (12.1-17.5) | 21.8                 | (19.2-24.4) | 16.9        | (14.3-19.7) | 19.2   | (16.3-22.3) | 16.1 | (15.6-16.6) |
| abs change*       | 5.1                    |             | 2.8                 |             | 9.6     |             | 11.1                 |             | 3.4         |             | 10.6   |             | 7.6  |             |
| <b>Stomach</b>    |                        |             |                     |             |         |             |                      |             |             |             |        |             |      |             |
| 1995-1999         | 25.6                   | (24.4-26.8) | 21.2                | (20.3-22.1) | 14.0    | (12.4-15.6) | 16.8                 | (15.1-18.6) | 21.1        | (19.1-23.2) | 21.2   | (19.4-22.9) | 13.9 | (13.5-14.3) |
| 2000-2004         | 27.9                   | (26.7-29.1) | 23.9                | (22.9-24.8) | 15.2    | (13.6-16.8) | 18.2                 | (16.4-20.0) | 23.6        | (21.5-25.8) | 21.9   | (20.1-23.8) | 15.9 | (15.4-16.3) |
| 2005-2009         | 29.0                   | (27.8-30.2) | 25.9                | (25.0-26.9) | 15.7    | (14.2-17.3) | 21.9                 | (20.0-23.7) | 23.9        | (21.7-26.1) | 25.0   | (23.0-27.1) | 18.8 | (18.3-19.3) |
| 2010-2014         | 32.6                   | (31.0-34.1) | 29.5                | (28.4-30.7) | 22.6    | (20.6-24.8) | 28.4                 | (26.0-30.8) | 24.4        | (22.0-26.9) | 26.7   | (24.4-29.1) | 20.6 | (20.0-21.2) |
| abs change*       | 7.0                    |             | 8.3                 |             | 8.6     |             | 11.6                 |             | 3.3         |             | 5.5    |             | 6.7  |             |
| <b>Colon</b>      |                        |             |                     |             |         |             |                      |             |             |             |        |             |      |             |
| 1995-1999         | 59.2                   | (58.5-59.9) | 57.4                | (56.8-57.9) | 48.9    | (47.7-50.1) | 48.7                 | (47.1-50.2) | 59.0        | (57.7-60.2) | 55.3   | (54.0-56.5) | 46.5 | (46.1-46.8) |
| 2000-2004         | 63.0                   | (62.3-63.7) | 60.7                | (60.2-61.3) | 53.1    | (51.9-54.2) | 51.8                 | (50.4-53.3) | 60.1        | (58.9-61.3) | 57.8   | (56.7-59.0) | 50.4 | (50.0-50.7) |
| 2005-2009         | 66.6                   | (66.0-67.2) | 64.9                | (64.4-65.4) | 57.4    | (56.3-58.5) | 57.7                 | (56.3-59.0) | 61.2        | (60.0-62.4) | 61.9   | (60.8-63.0) | 54.7 | (54.4-55.1) |
| 2010-2014         | 70.2                   | (69.4-70.9) | 66.3                | (65.8-66.9) | 65.5    | (64.2-66.7) | 61.4                 | (59.8-62.9) | 62.0        | (60.6-63.3) | 64.8   | (63.6-66.0) | 58.5 | (58.1-58.8) |
| abs change*       | 11.0                   |             | 8.9                 |             | 16.6    |             | 12.7                 |             | 3.0         |             | 9.5    |             | 12.0 |             |
| <b>Rectum</b>     |                        |             |                     |             |         |             |                      |             |             |             |        |             |      |             |
| 1995-1999         | 58.9                   | (57.6-60.0) | 57.1                | (56.1-58.2) | 48.0    | (46.3-49.7) | 47.0                 | (44.6-49.4) | 56.0        | (53.7-58.3) | 57.2   | (55.3-58.9) | 47.5 | (46.9-48.0) |
| 2000-2004         | 63.8                   | (62.7-64.9) | 61.2                | (60.3-62.2) | 53.9    | (52.2-55.6) | 50.8                 | (48.5-52.9) | 59.5        | (57.3-61.6) | 61.5   | (59.7-63.1) | 52.6 | (52.0-53.1) |
| 2005-2009         | 68.3                   | (67.2-69.3) | 65.0                | (64.2-65.9) | 60.6    | (59.2-62.1) | 56.9                 | (54.7-59.0) | 62.1        | (60.1-64.1) | 65.2   | (63.6-66.9) | 56.6 | (56.1-57.2) |
| 2010-2014         | 70.6                   | (69.4-71.8) | 66.8                | (65.8-67.8) | 69.1    | (67.4-70.7) | 62.1                 | (59.6-64.6) | 65.1        | (62.8-67.3) | 68.6   | (66.8-70.4) | 61.8 | (61.2-62.3) |
| abs change*       | 11.7                   |             | 9.7                 |             | 21.1    |             | 15.1                 |             | 9.1         |             | 11.4   |             | 14.3 |             |
| <b>Pancreas</b>   |                        |             |                     |             |         |             |                      |             |             |             |        |             |      |             |
| 1995-1999         | 6.3                    | (5.6-7.1)   | 6.8                 | (6.2-7.3)   | 3.1     | (2.5-3.9)   | 5.4                  | (4.2-6.8)   | 8.7         | (7.1-10.4)  | 4.4    | (3.5-5.5)   | 3.2  | (3.0-3.4)   |
| 2000-2004         | 7.6                    | (6.9-8.4)   | 7.6                 | (7.1-8.2)   | 3.8     | (3.1-4.6)   | 5.7                  | (4.5-7.1)   | 6.9         | (5.5-8.4)   | 4.6    | (3.8-5.6)   | 3.9  | (3.6-4.1)   |
| 2005-2009         | 9.1                    | (8.3-9.8)   | 9.4                 | (8.8-10.0)  | 5.7     | (4.9-6.5)   | 6.9                  | (5.7-8.2)   | 7.2         | (6.0-8.5)   | 5.8    | (4.8-6.8)   | 5.4  | (5.1-5.7)   |
| 2010-2014         | 14.4                   | (13.3-15.5) | 11.0                | (10.3-11.7) | 9.6     | (8.5-10.8)  | 9.5                  | (7.7-11.5)  | 8.1         | (6.8-9.6)   | 9.8    | (8.5-11.3)  | 7.8  | (7.4-8.2)   |
| abs change*       | 8.1                    |             | 4.2                 |             | 6.5     |             | 4.1                  |             | -0.6        |             | 5.4    |             | 4.6  |             |
| <b>Lung</b>       |                        |             |                     |             |         |             |                      |             |             |             |        |             |      |             |
| 1995-1999         | 13.2                   | (12.7-13.7) | 15.1                | (14.8-15.4) | 8.1     | (7.6-8.6)   | 9.0                  | (8.3-9.8)   | 11.4        | (10.6-12.2) | 10.7   | (10.0-11.5) | 7.1  | (6.9-7.2)   |
| 2000-2004         | 14.7                   | (14.2-15.2) | 15.7                | (15.4-16.1) | 9.7     | (9.1-10.2)  | 9.9                  | (9.2-10.7)  | 10.8        | (10.0-11.5) | 11.8   | (11.1-12.5) | 8.2  | (8.0-8.3)   |
| 2005-2009         | 17.0                   | (16.6-17.5) | 18.2                | (17.9-18.5) | 12.4    | (11.8-12.9) | 13.3                 | (12.5-14.1) | 11.7        | (11.0-12.5) | 15.3   | (14.5-16.0) | 9.8  | (9.7-10.0)  |
| 2010-2014         | 21.1                   | (20.5-21.8) | 21.5                | (21.1-22.0) | 18.7    | (18.0-19.5) | 19.7                 | (18.6-20.8) | 15.4        | (14.4-16.4) | 20.1   | (19.2-21.1) | 14.6 | (14.4-14.8) |
| abs change*       | 7.9                    |             | 6.4                 |             | 10.6    |             | 10.7                 |             | 4.0         |             | 9.4    |             | 7.5  |             |
| <b>Ovary</b>      |                        |             |                     |             |         |             |                      |             |             |             |        |             |      |             |
| 1995-1999         | 35.3                   | (33.7-36.9) | 35.1                | (34.0-36.3) | 31.8    | (29.9-33.8) | 27.3                 | (24.8-29.8) | 31.8        | (28.9-34.7) | 36.8   | (34.6-39.0) | 27.0 | (26.5-27.6) |
| 2000-2004         | 35.9                   | (34.4-37.5) | 36.0                | (34.9-37.1) | 34.1    | (32.2-36.0) | 29.1                 | (26.8-31.5) | 33.2        | (30.4-36.0) | 40.5   | (38.3-42.6) | 28.5 | (28.0-29.0) |
| 2005-2009         | 39.7                   | (38.1-41.2) | 39.4                | (38.4-40.5) | 38.2    | (36.2-40.2) | 30.8                 | (28.5-33.3) | 32.5        | (29.8-35.2) | 41.0   | (38.8-43.1) | 31.7 | (31.2-32.3) |
| 2010-2014         | 42.7                   | (40.9-44.6) | 40.0                | (38.7-41.2) | 41.9    | (39.6-44.3) | 35.8                 | (32.9-38.8) | 36.2        | (33.1-39.2) | 45.7   | (43.1-48.2) | 36.7 | (36.1-37.4) |
| abs change*       | 7.4                    |             | 4.9                 |             | 10.1    |             | 8.5                  |             | 4.4         |             | 8.9    |             | 9.7  |             |

\* Absolute change between 1995-1999 and 2010-2014

<sup>†</sup> Australia includes New South Wales (1995-2012), Victoria and Western Australia

<sup>‡</sup> Canada includes Alberta, British Columbia, Manitoba, New Brunswick, Nova Scotia, Ontario, Prince Edward Island and Saskatchewan

<sup>¶</sup> Ireland (1995-2013)

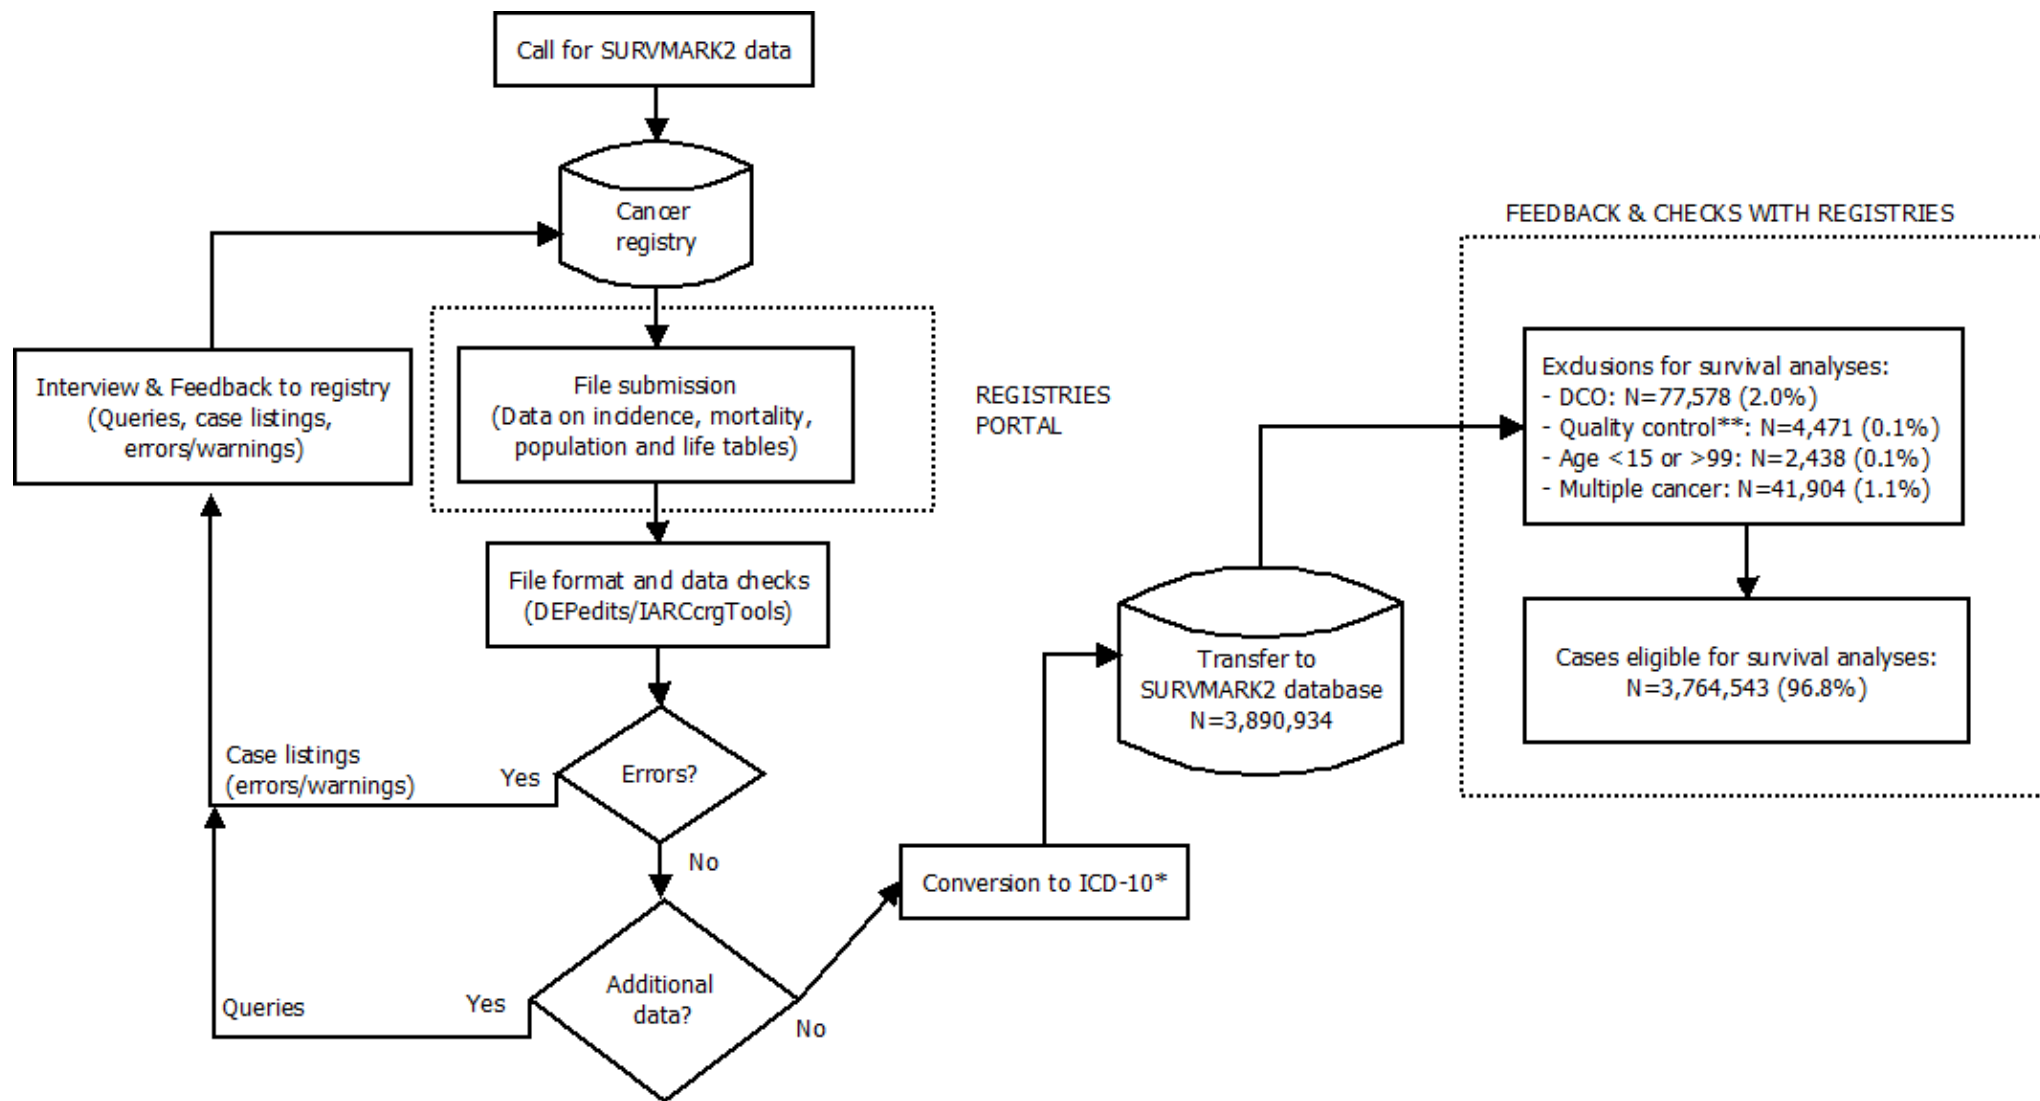

**Figure S1. Overall flow of data, processing steps and exclusions in SURVMARK-2**

\*where applicable

\*\*includes invalid and missing dates, invalid age and tumours of non-malignant behaviour

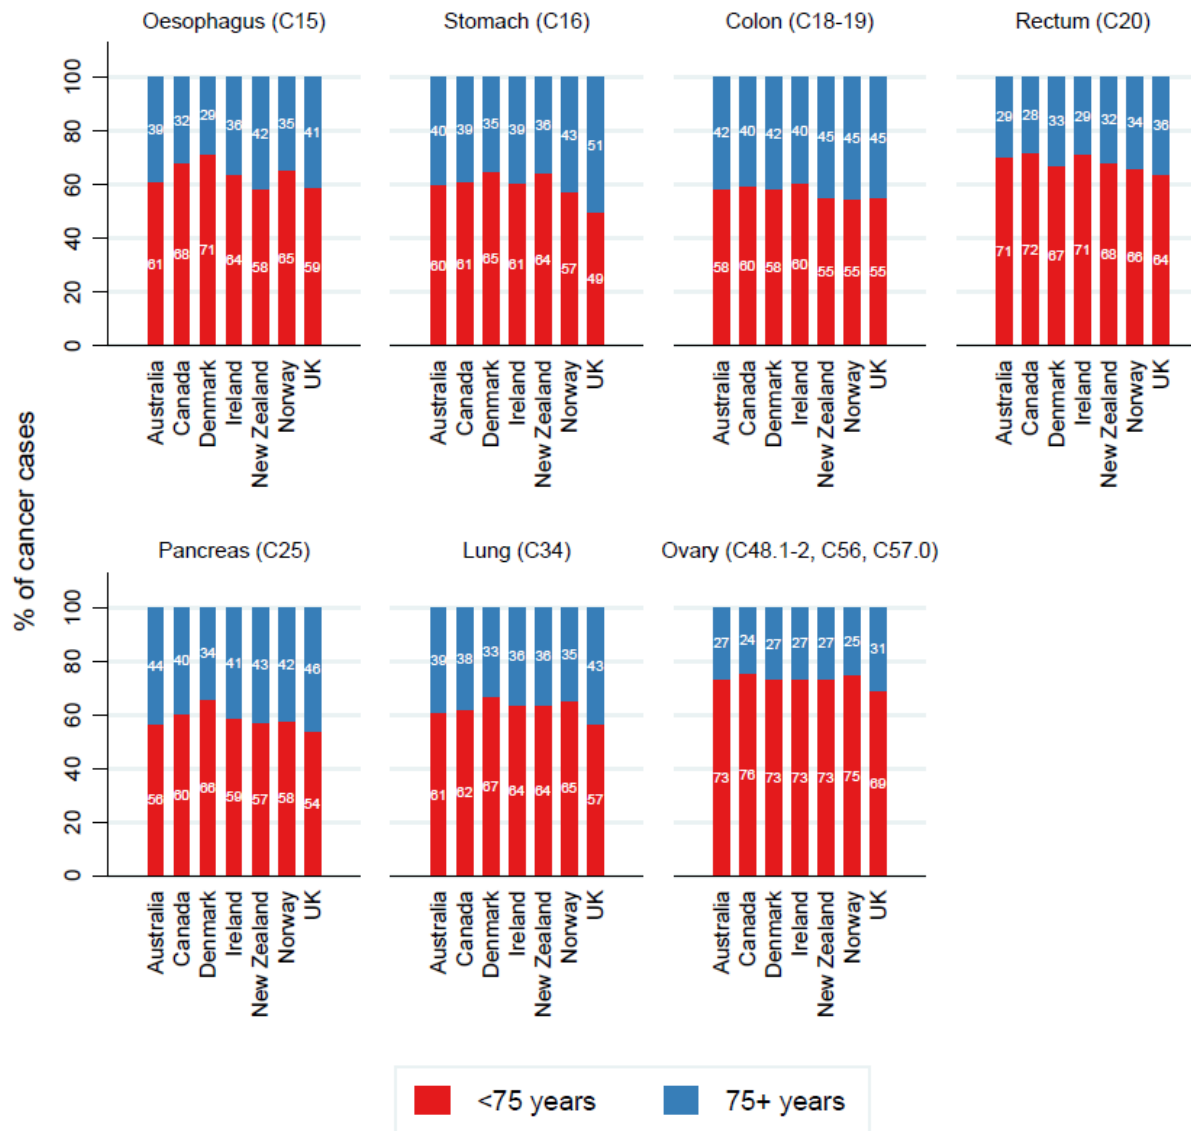

Figure S2. Case distribution by cancer site, age group and country in patients diagnosed 2010-2014

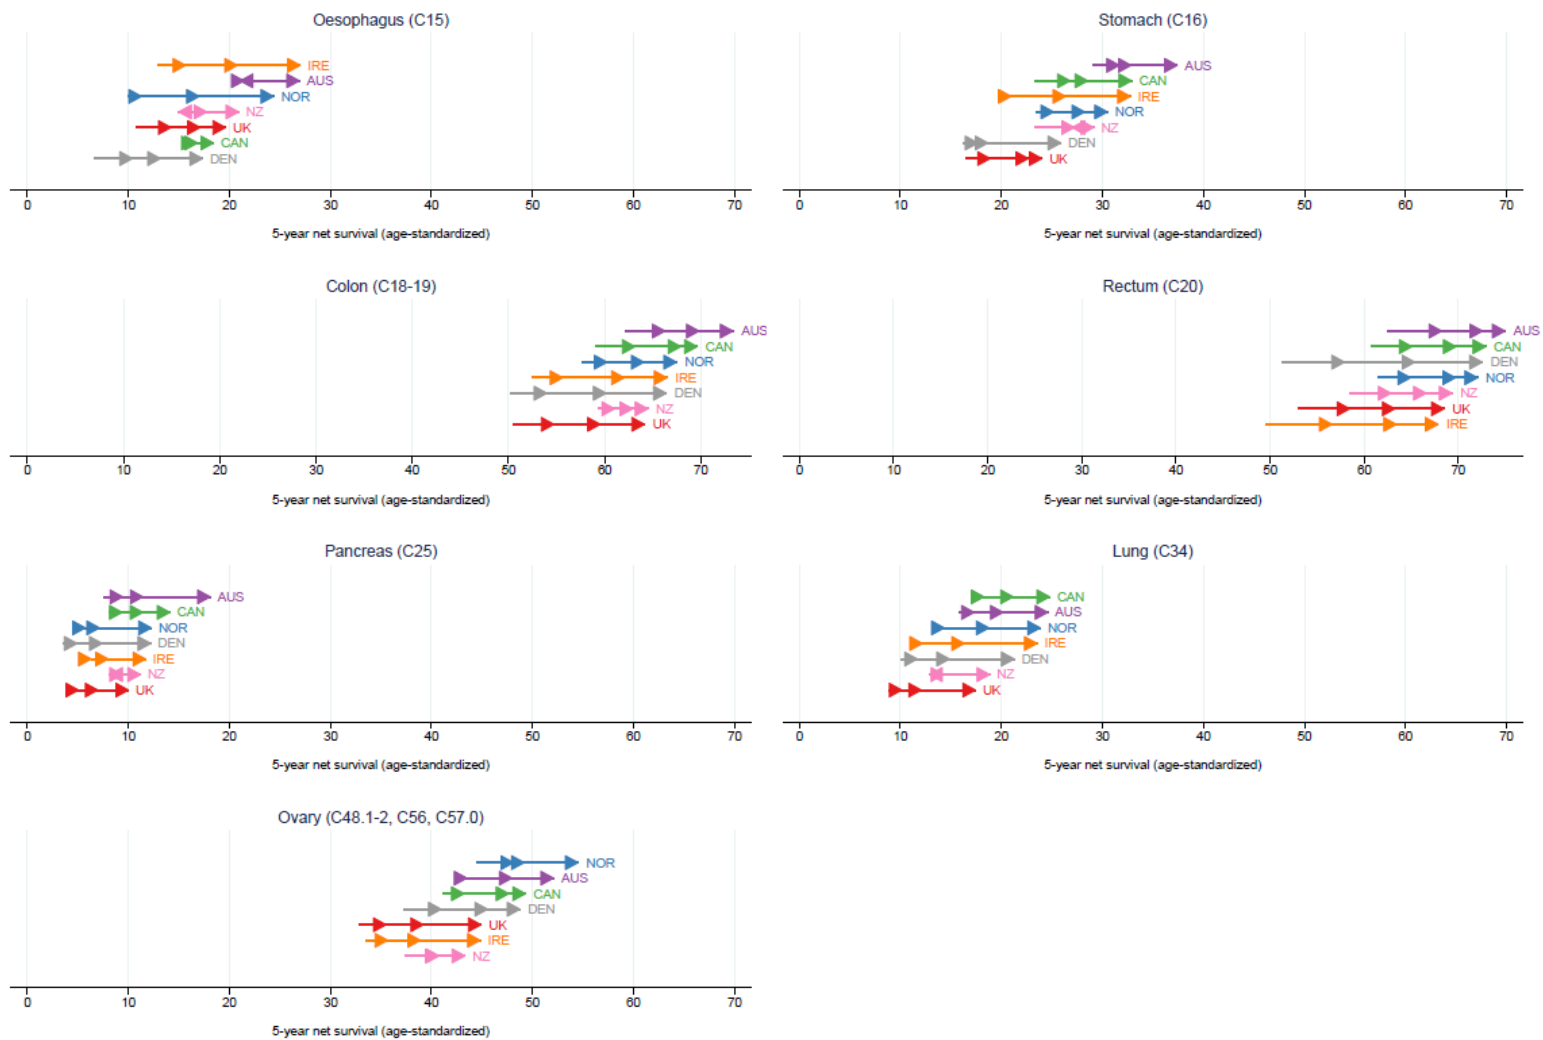

Beginning of arrow denotes estimates for 1995-1999, arrow heads from left to right refer to 2000-2004, 2005-2009 and 2010-2014 estimates

**Figure S3. Age-standardized 5-year net survival by site, country\* and period of diagnosis in patients aged below 75 years diagnosed 1995-2014**

\*Australia includes New South Wales (1995-2012), Victoria and Western Australia; Canada includes Alberta, British Columbia, Manitoba, New Brunswick, Nova Scotia, Ontario, Prince Edward Island and Saskatchewan; Ireland (1995-2013); all other countries with national data (1995-2014)

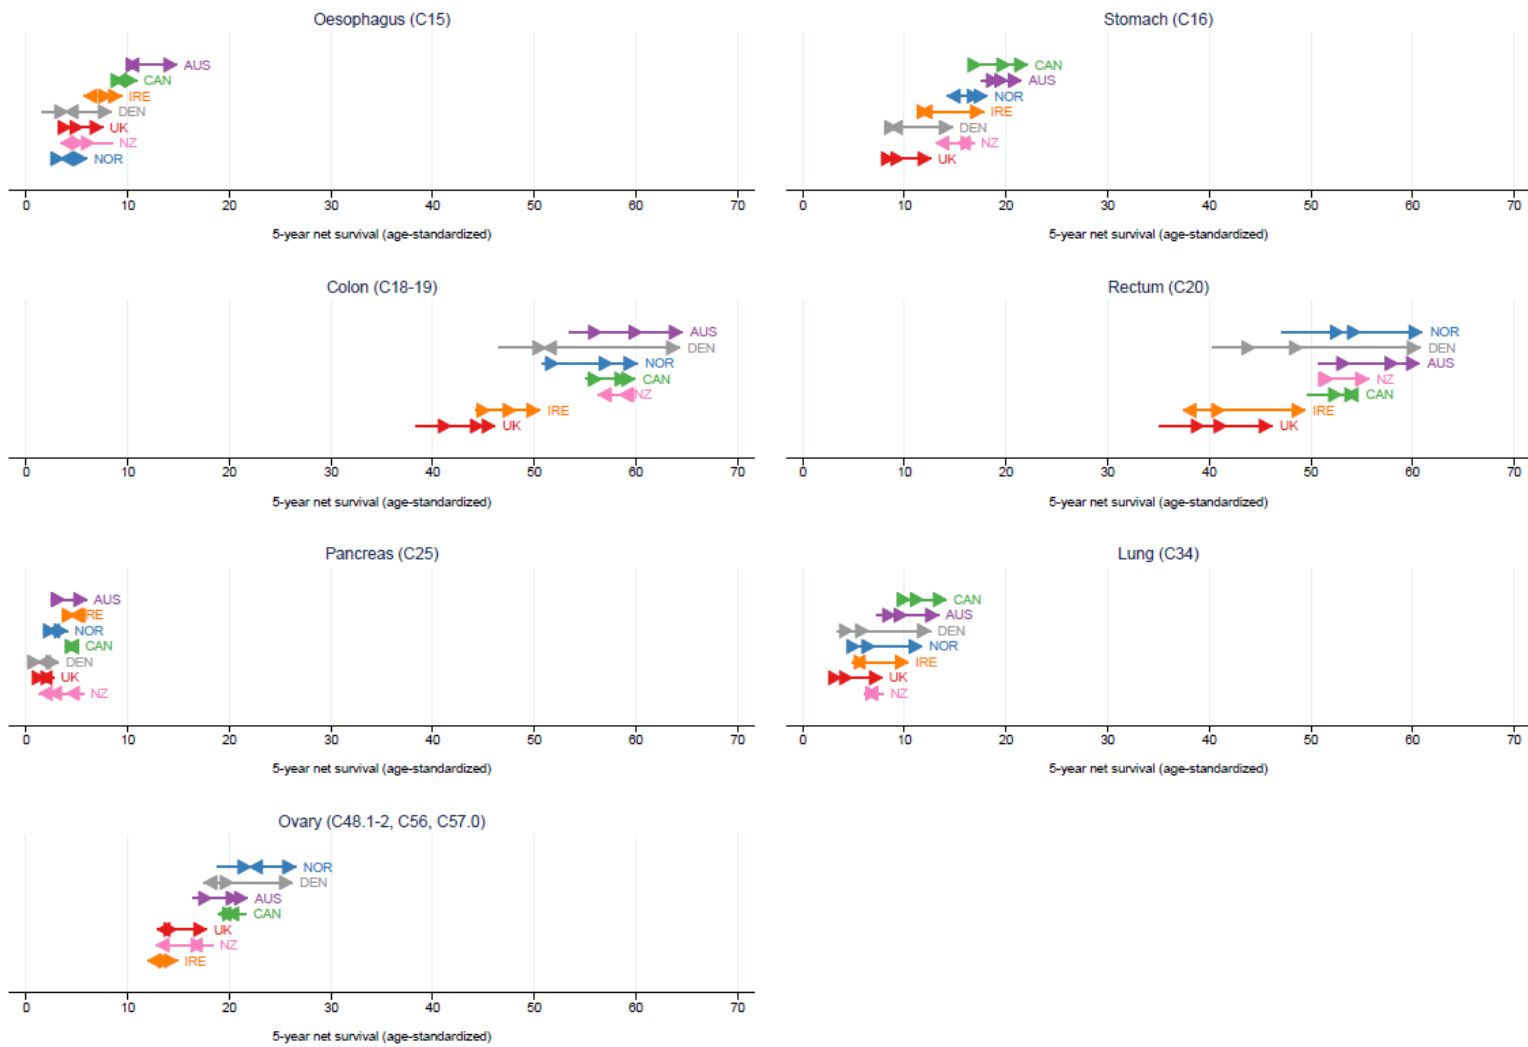

Beginning of arrow denotes estimates for 1995-1999, arrow heads from left to right refer to 2000-2004, 2005-2009 and 2010-2014 estimates

**Figure S4. 5-year net survival by site, country\* and period of diagnosis in patients aged 75 years and above diagnosed 1995-2014**

\*Australia includes New South Wales (1995-2012), Victoria and Western Australia; Canada includes Alberta, British Columbia, Manitoba, New Brunswick, Nova Scotia, Ontario, Prince Edward Island and Saskatchewan; Ireland (1995-2013); all other countries with national data (1995-2014)

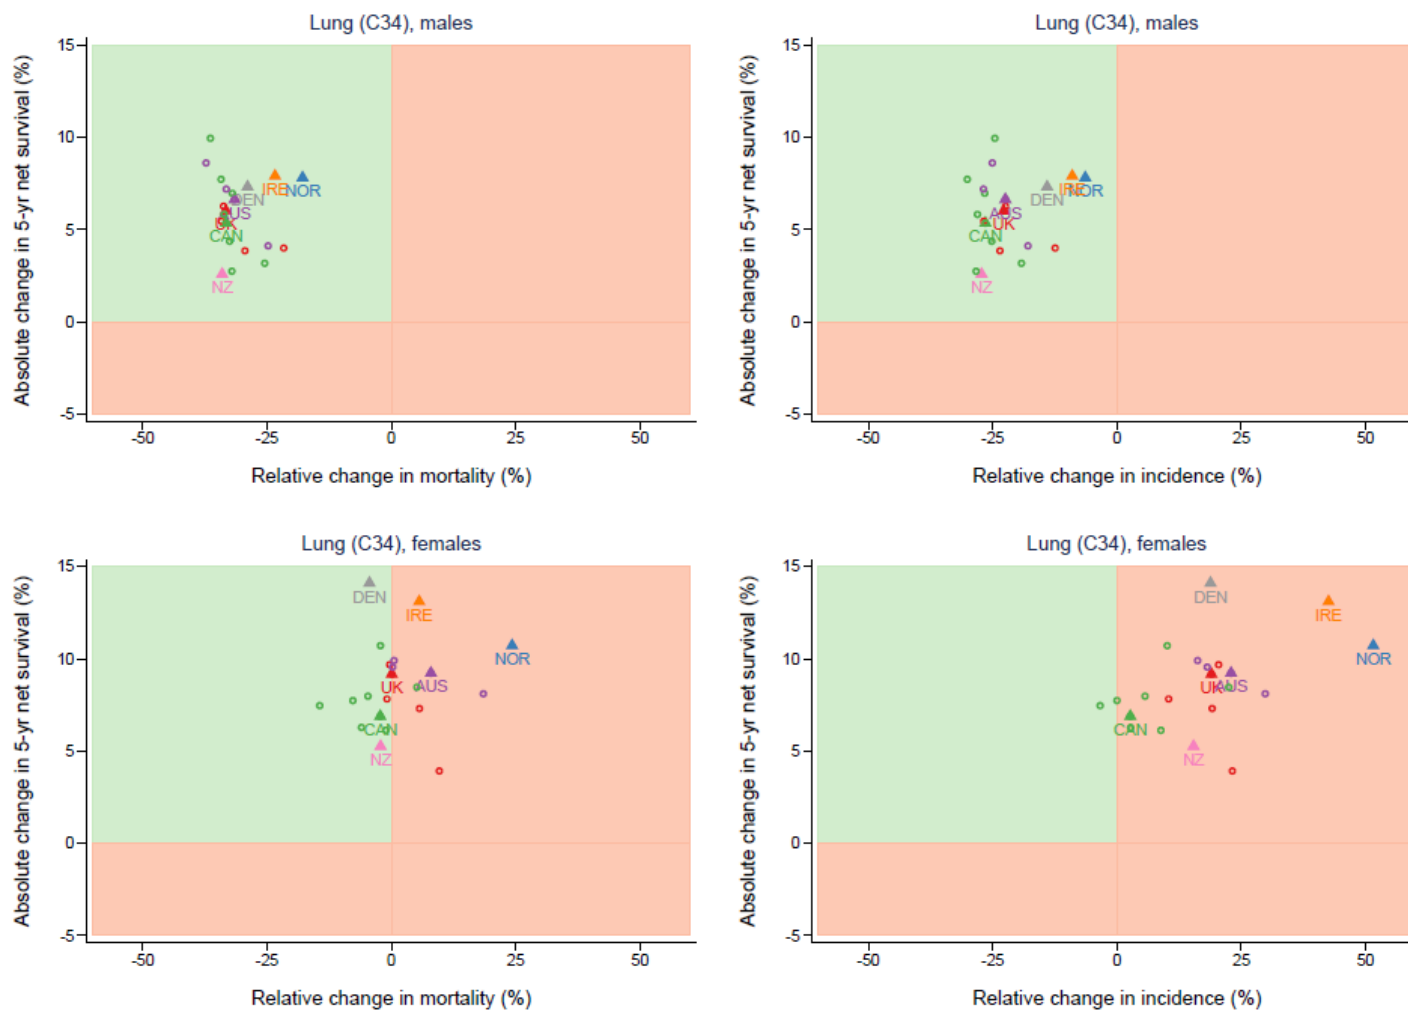

**Figure S5. Changes in age-standardised 5-year net survival, mortality and incidence for lung cancer, by sex (comparing 2010-2014 to 1995-1999) (circles=jurisdictions; triangles=countries)**

*Mortality data includes cancers of the trachea and lung (C33-34)*

*Australia includes New South Wales (1995-2012), Victoria and Western Australia; Canada includes Alberta, British Columbia, Manitoba, New Brunswick, Nova Scotia, Ontario, Prince Edward Island and Saskatchewan; Ireland (1995-2013); all other countries with national data (1995-2014)*

*Estimates for Prince Edward Island (Canada) are not shown.*

*Age-standardised net survival is for ages 15-99; age-standardized incidence and mortality rates are for ages 25+*

### Oesophagus (C15)

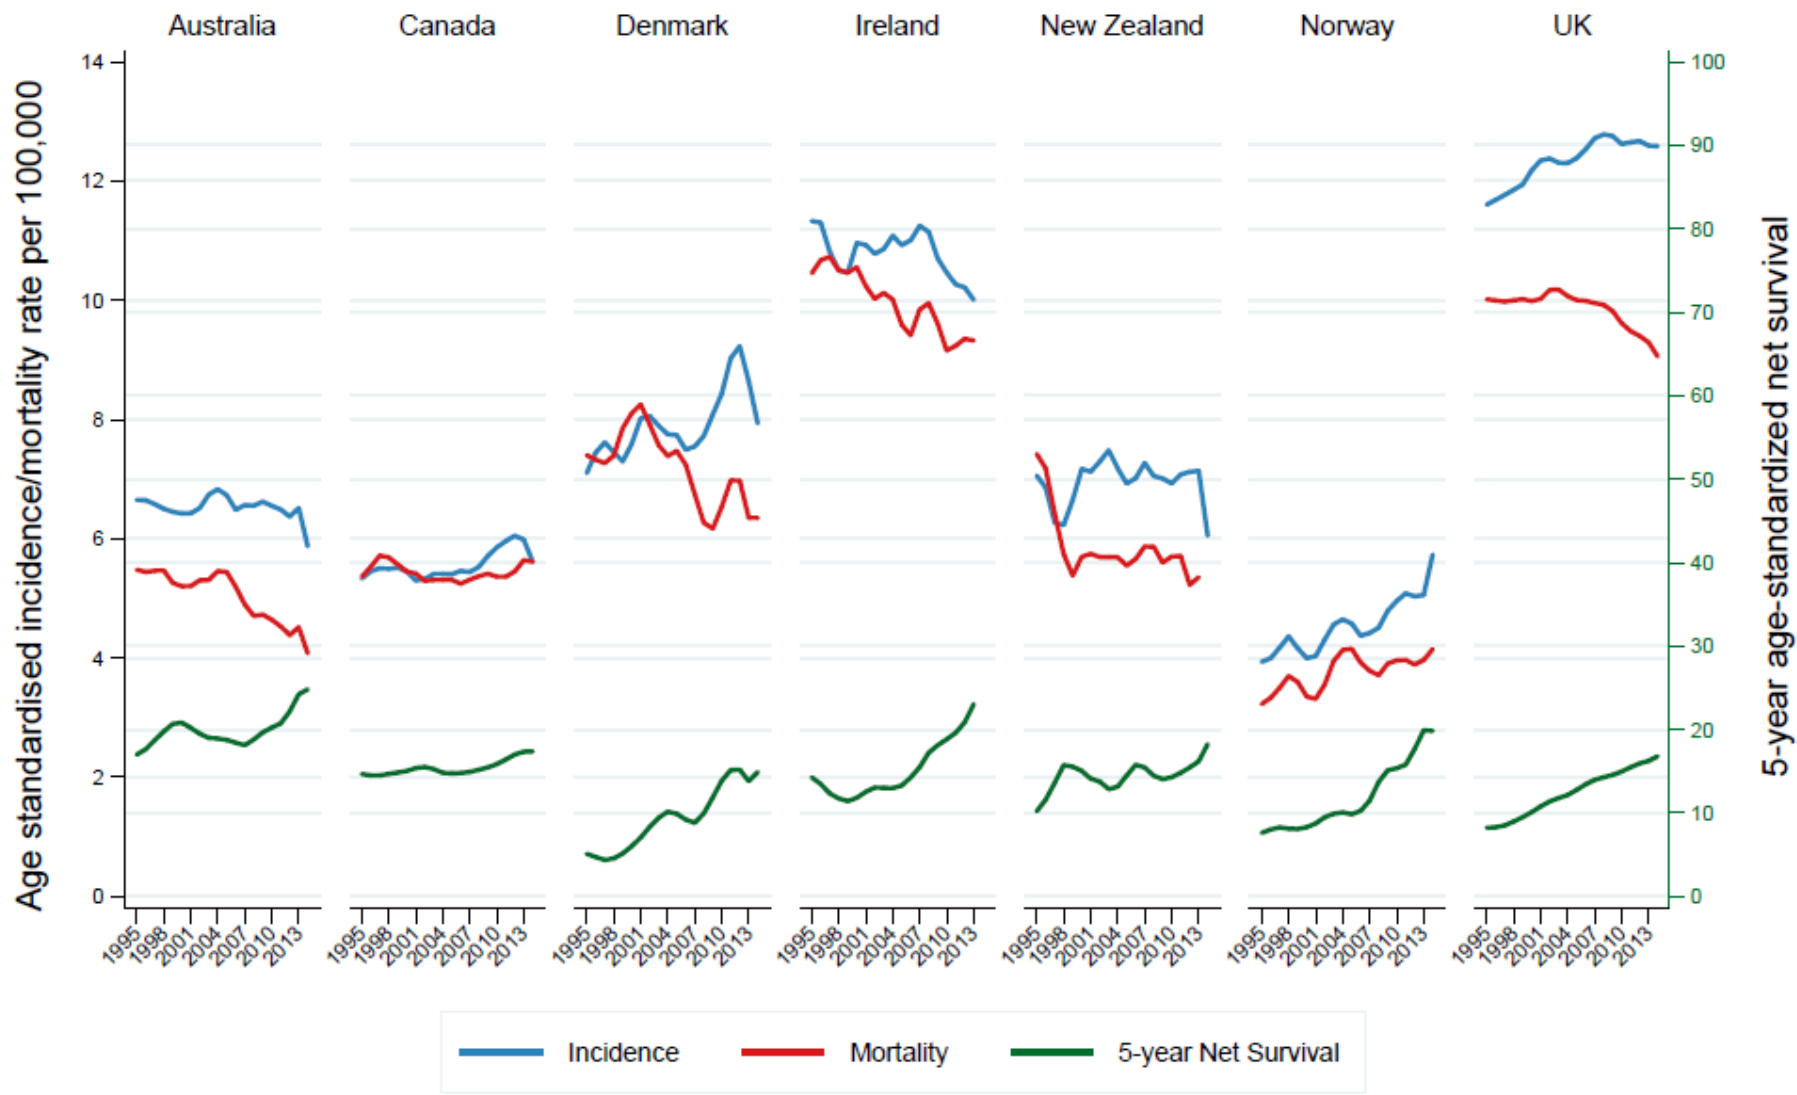

**Figure S6A. Annual trends in age-standardised incidence and mortality rates and in 5-year age-standardized net survival from oesophageal cancer by country 1995-2014**

*Age-standardised net survival is for ages 15-99; age-standardized incidence and mortality rates are for ages 25+*

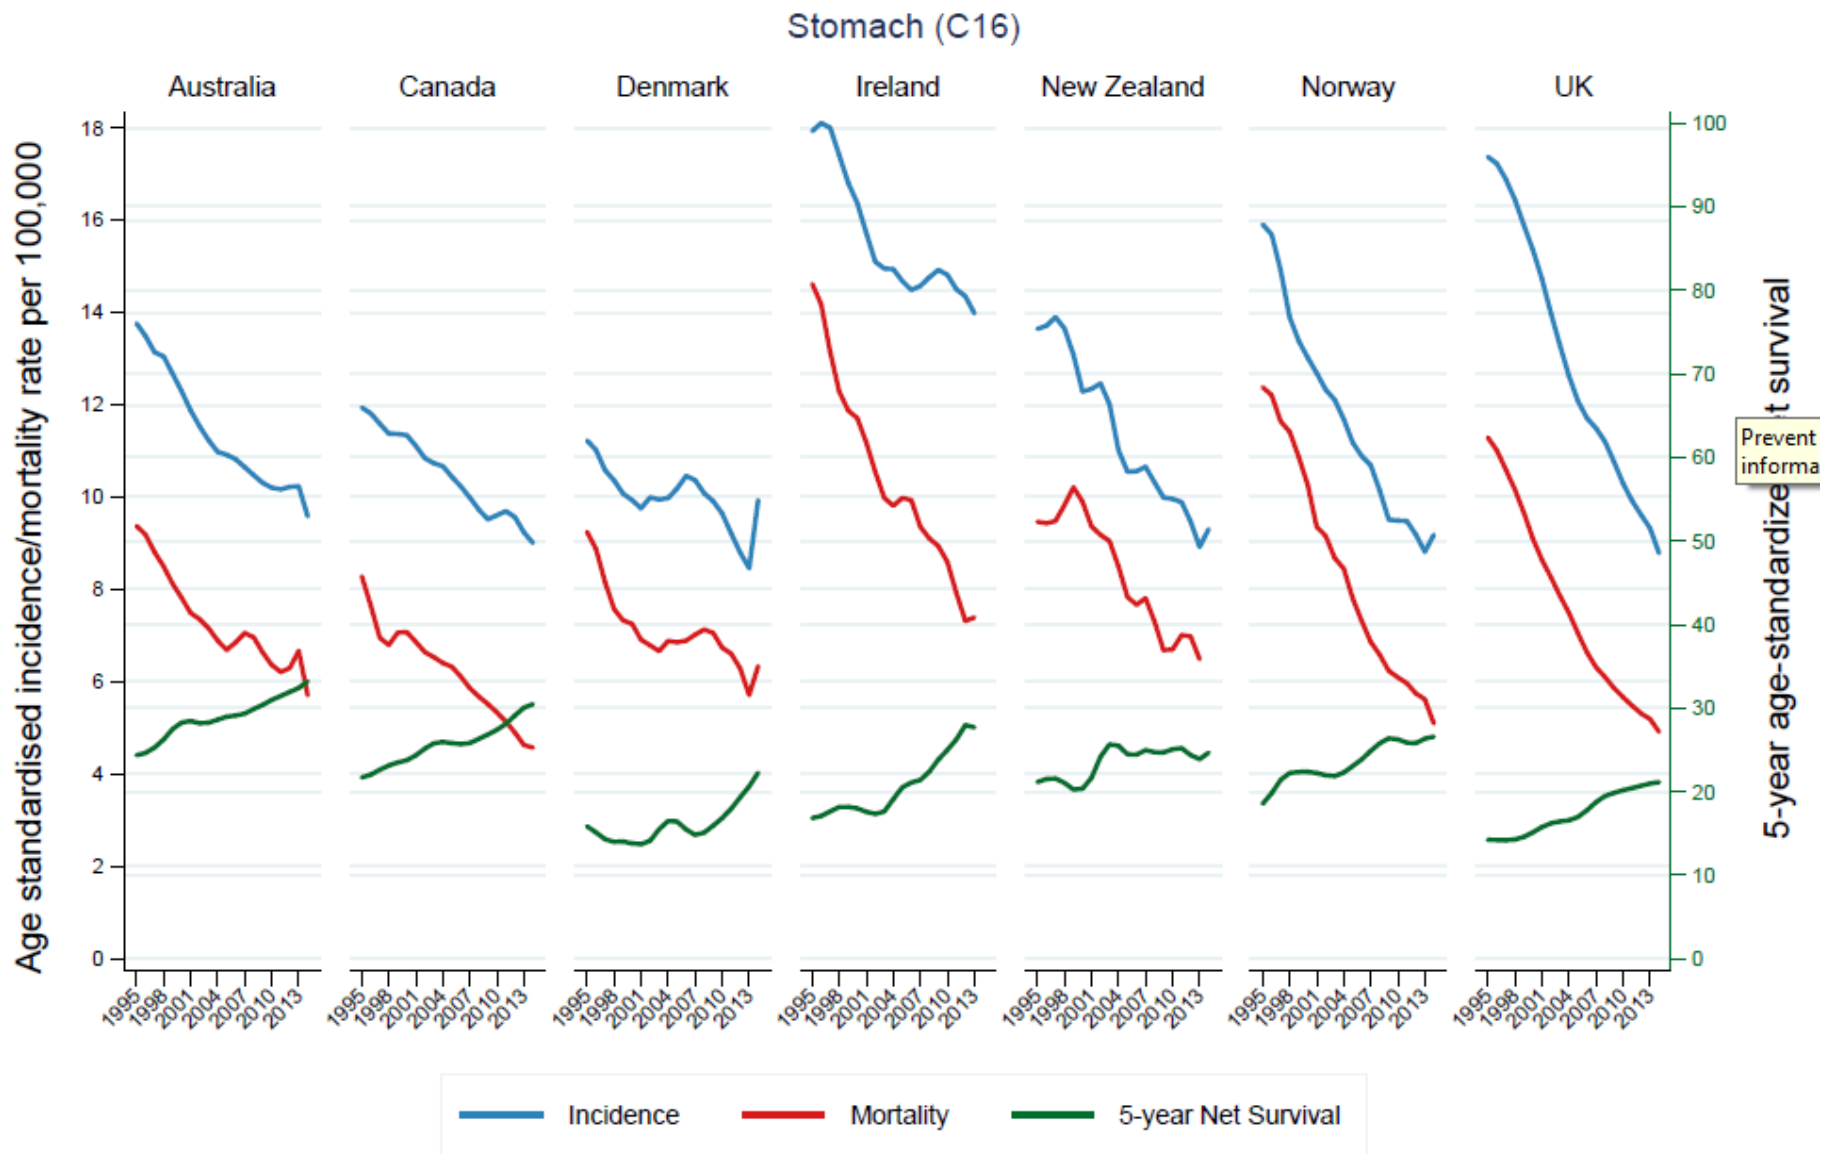

**Figure S6B. Annual trends in age-standardised incidence and mortality rates and in 5-year age-standardized net survival from stomach cancer by country 1995-2014**

*Age-standardised net survival is for ages 15-99; age-standardized incidence and mortality rates are for ages 25+*



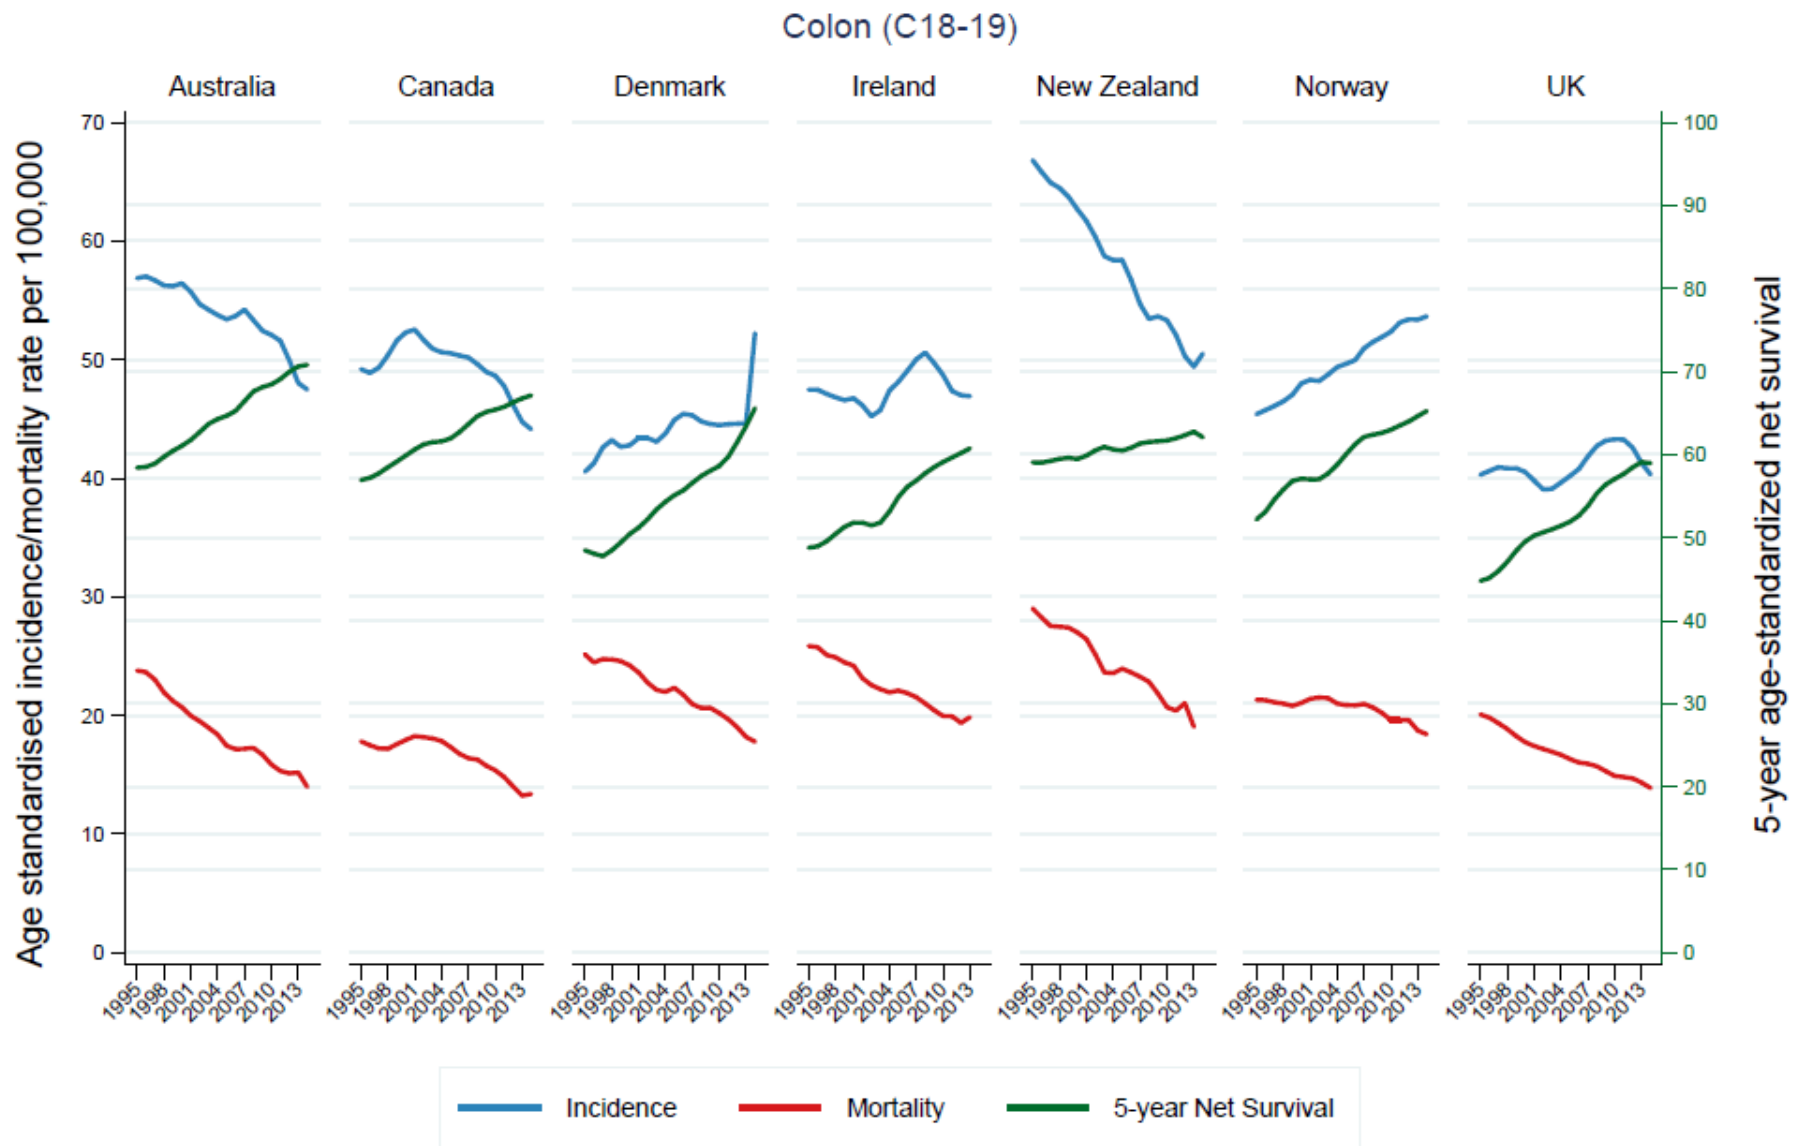

**Figure S6C. Annual trends in age-standardised incidence and mortality rates and in 5-year age-standardized net survival from colon cancer by country 1995-2014**

*Age-standardised net survival is for ages 15-99; age-standardized incidence and mortality rates are for ages 25+*

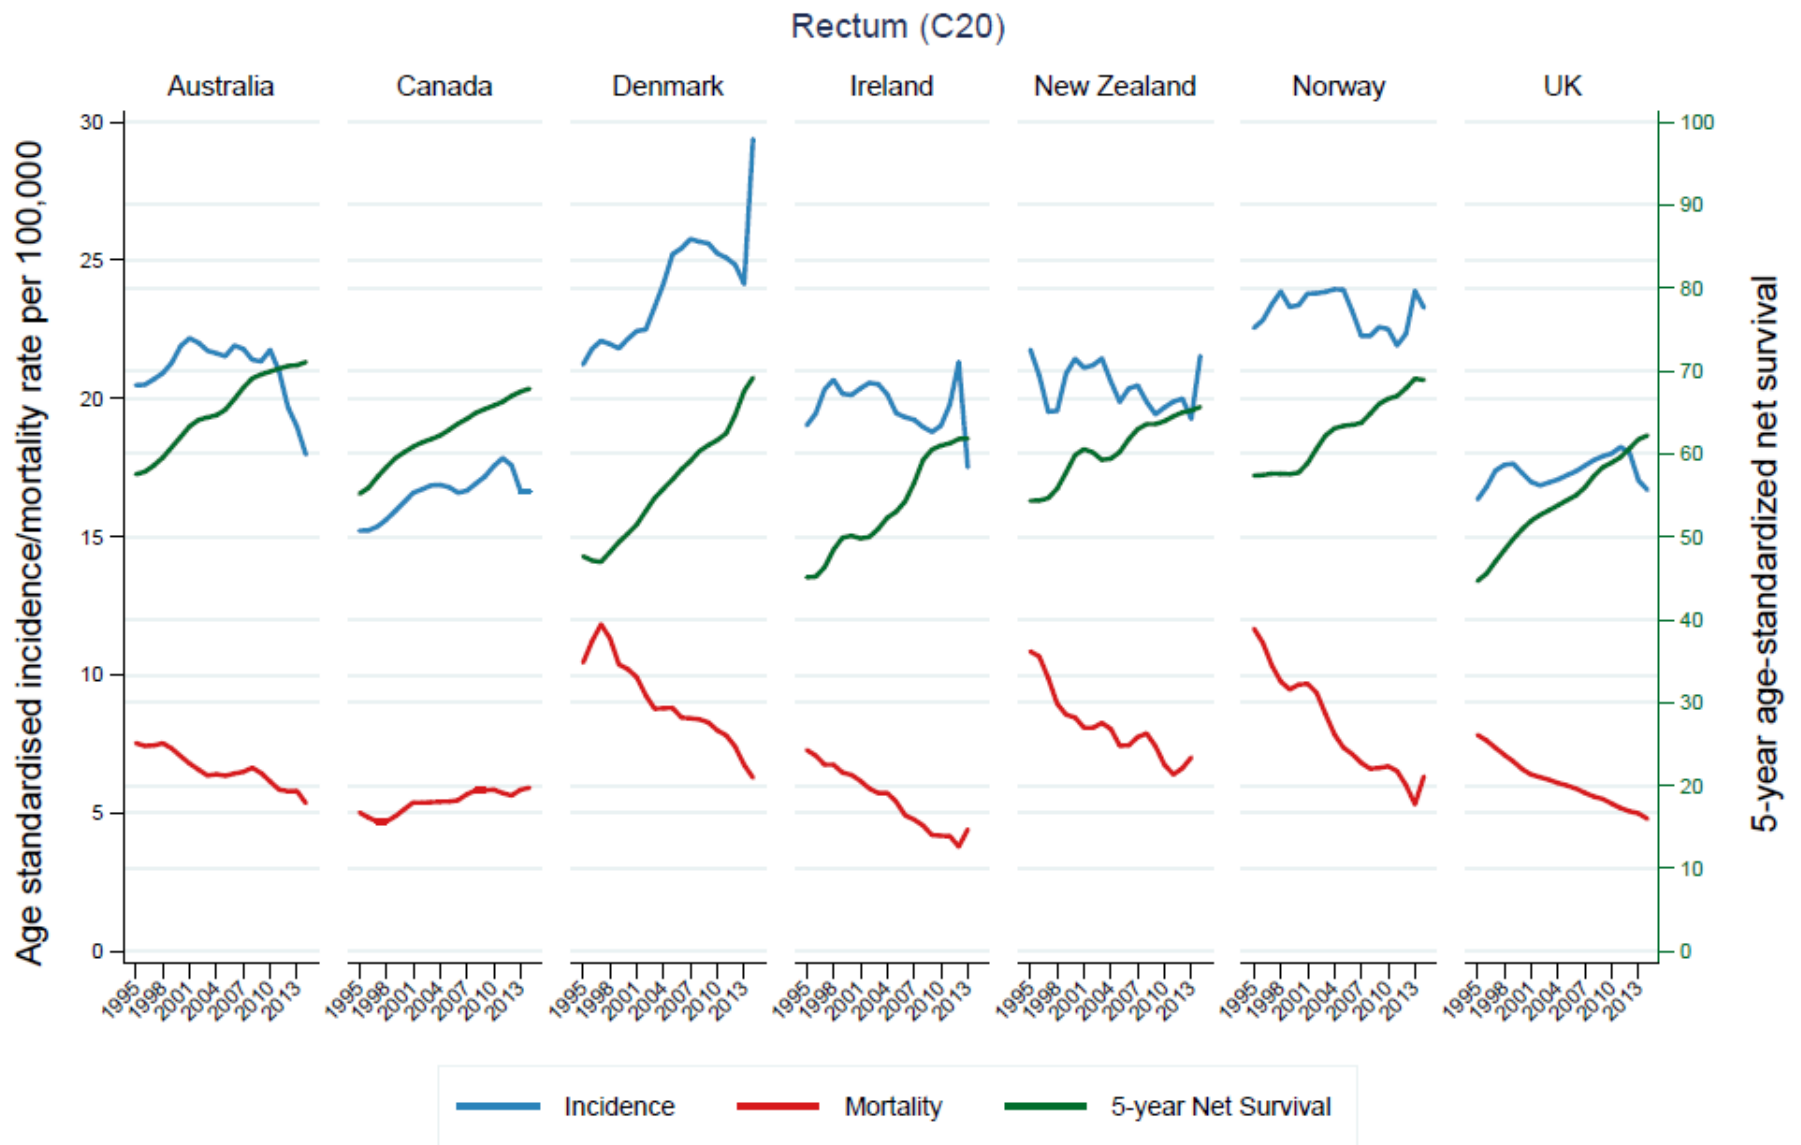

**Figure S6D.** Annual trends in age-standardised incidence and mortality rates and in 5-year age-standardized net survival from rectal cancer by country 1995-2014

*Age-standardised net survival is for ages 15-99; age-standardized incidence and mortality rates are for ages 25+*

### Pancreas (C25)

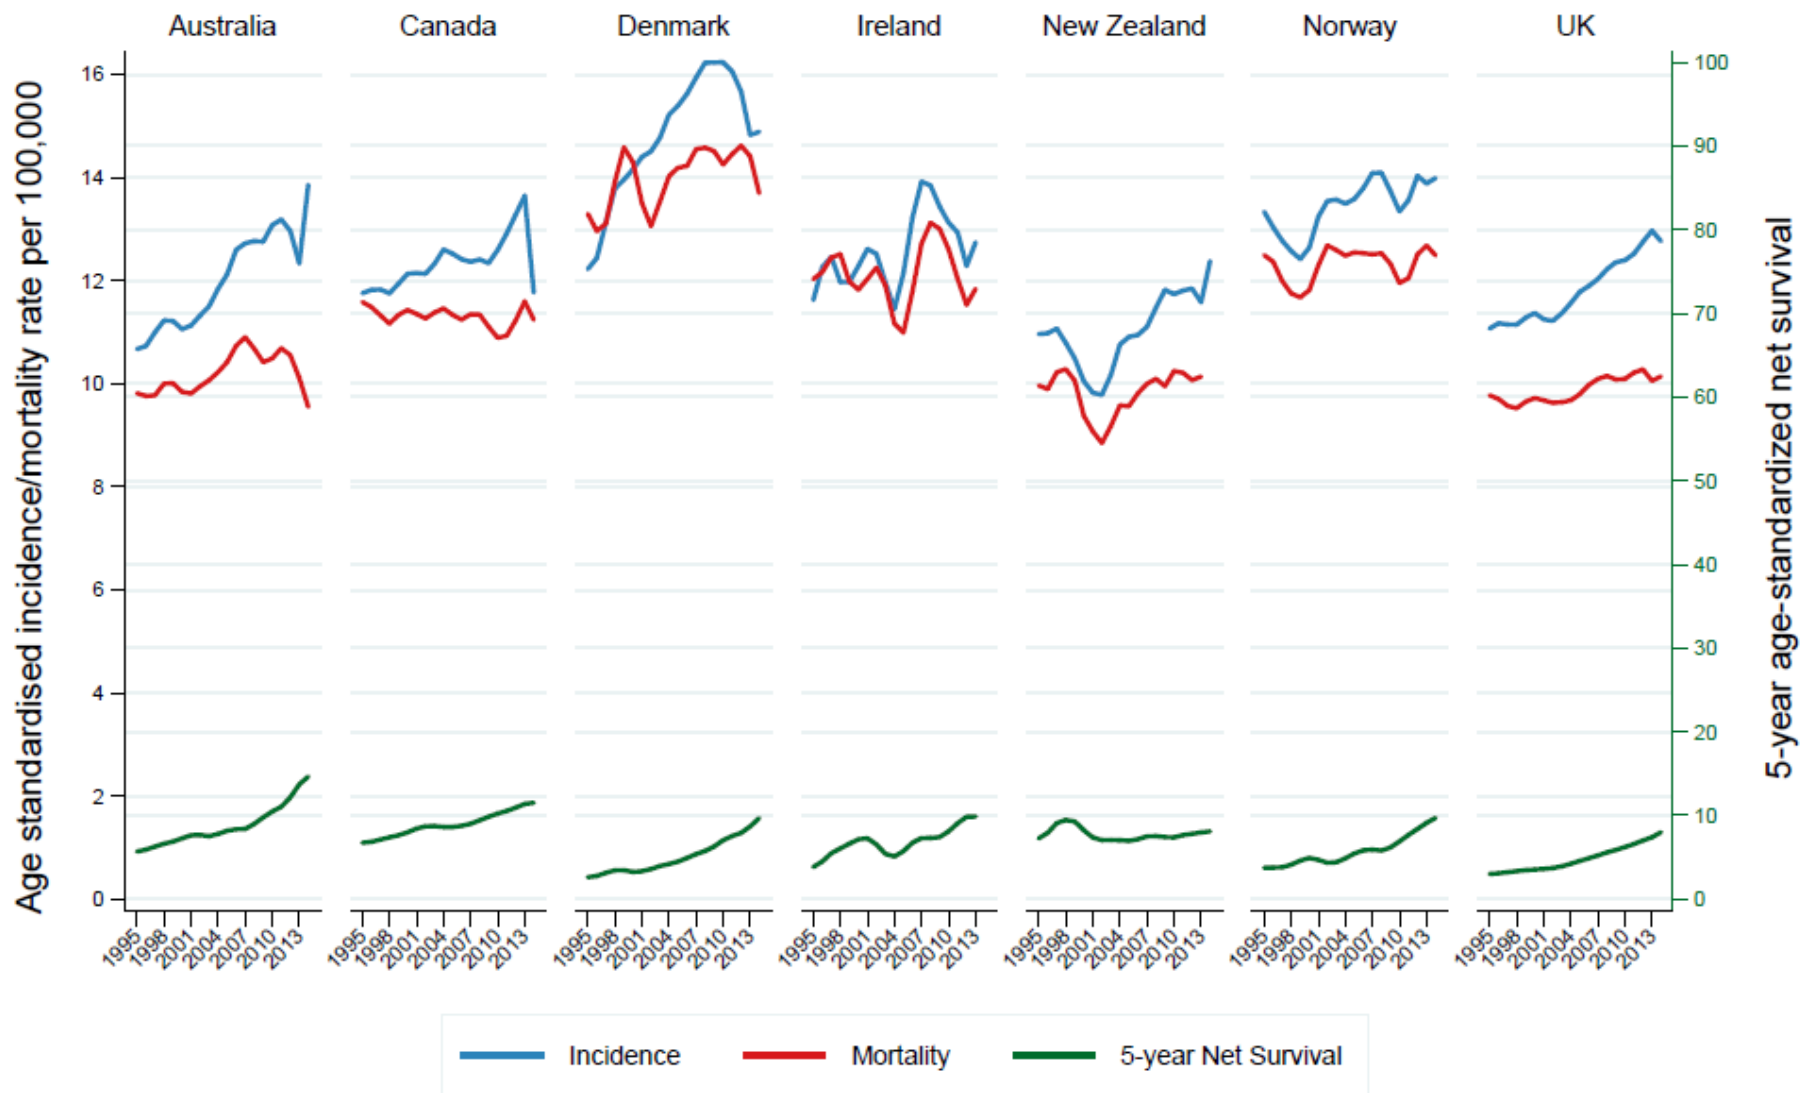

Figure S6E. Annual trends in age-standardised incidence and mortality rates and in 5-year age-standardized net survival from pancreatic cancer by country 1995-2014

Age-standardised net survival is for ages 15-99; age-standardized incidence and mortality rates are for ages 25+

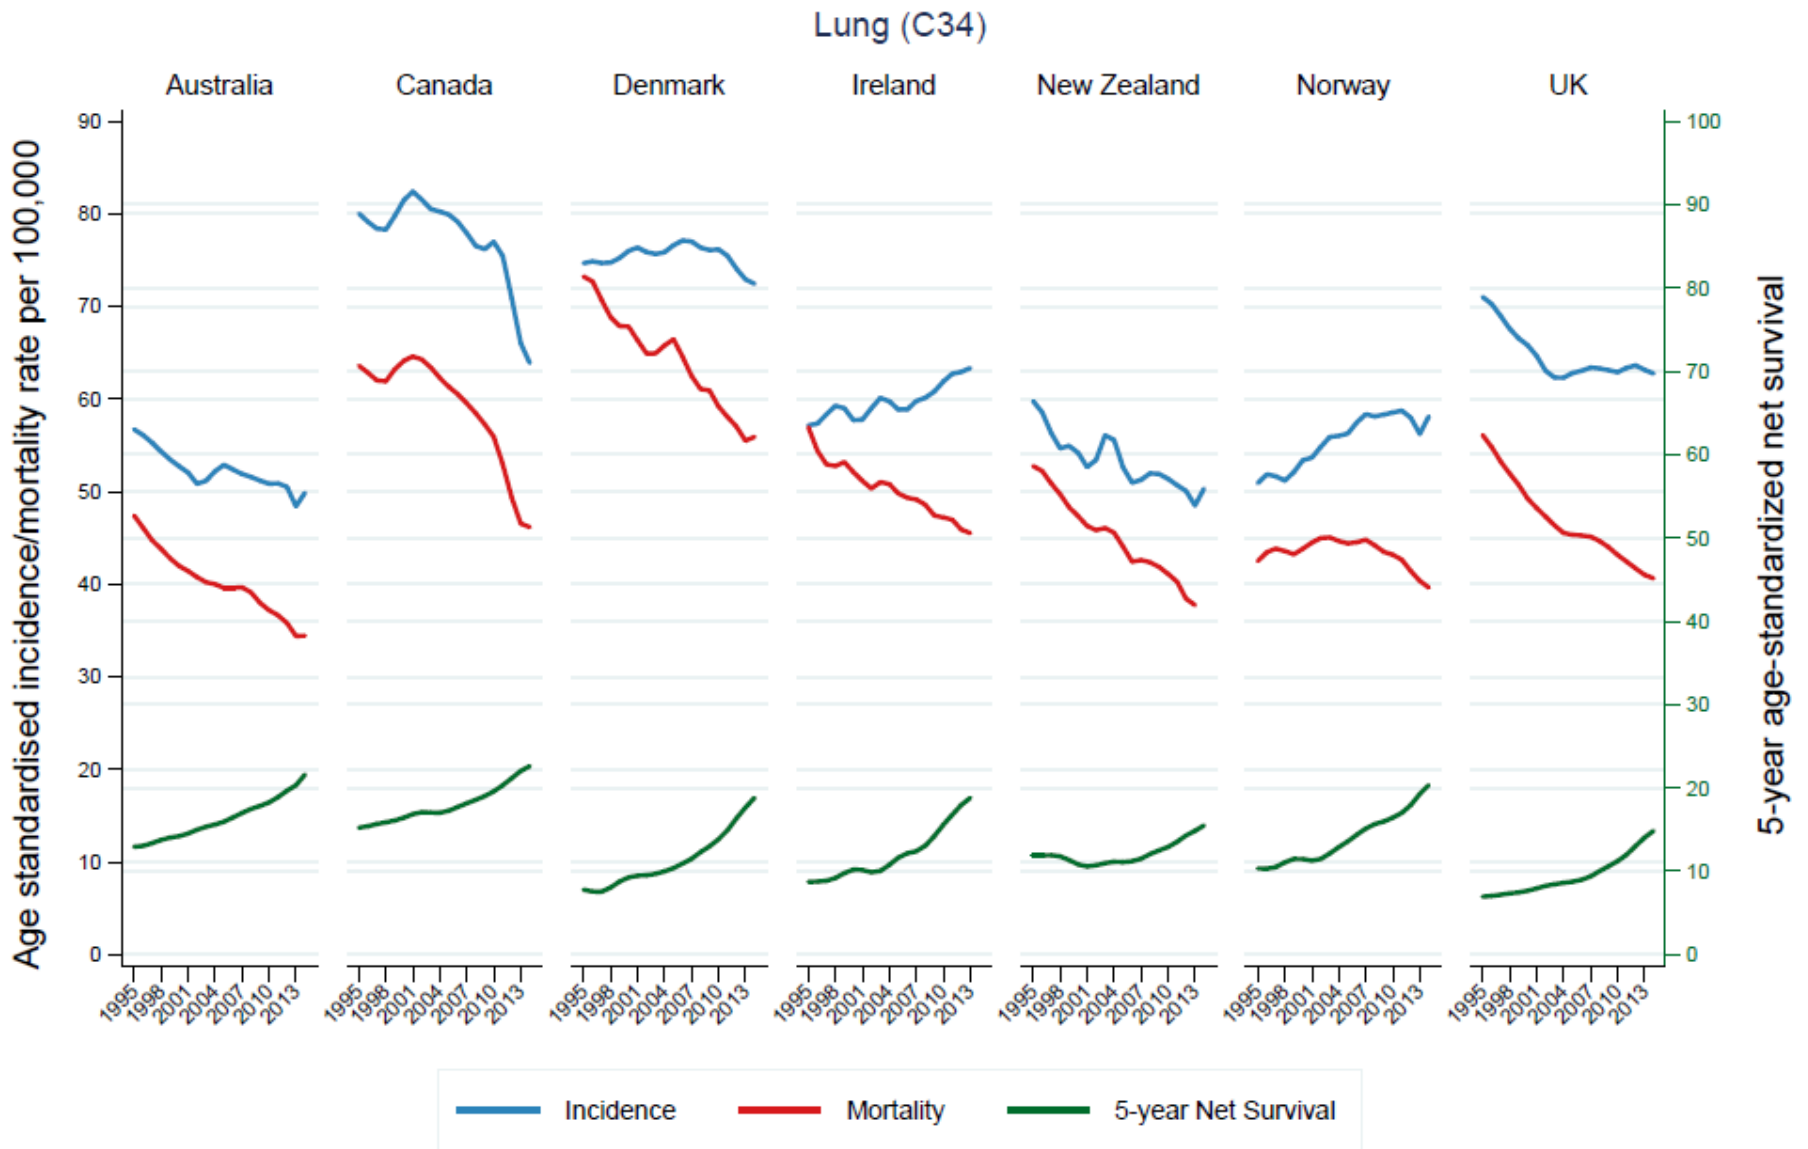

**Figure S6F. Annual trends in age-standardised incidence and mortality rates and in 5-year age-standardized net survival from lung cancer by country 1995-2014**

*\*Mortality data includes cancers of the trachea and lung (C33-34)*

*Age-standardised net survival is for ages 15-99; age-standardized incidence and mortality rates are for ages 25+*

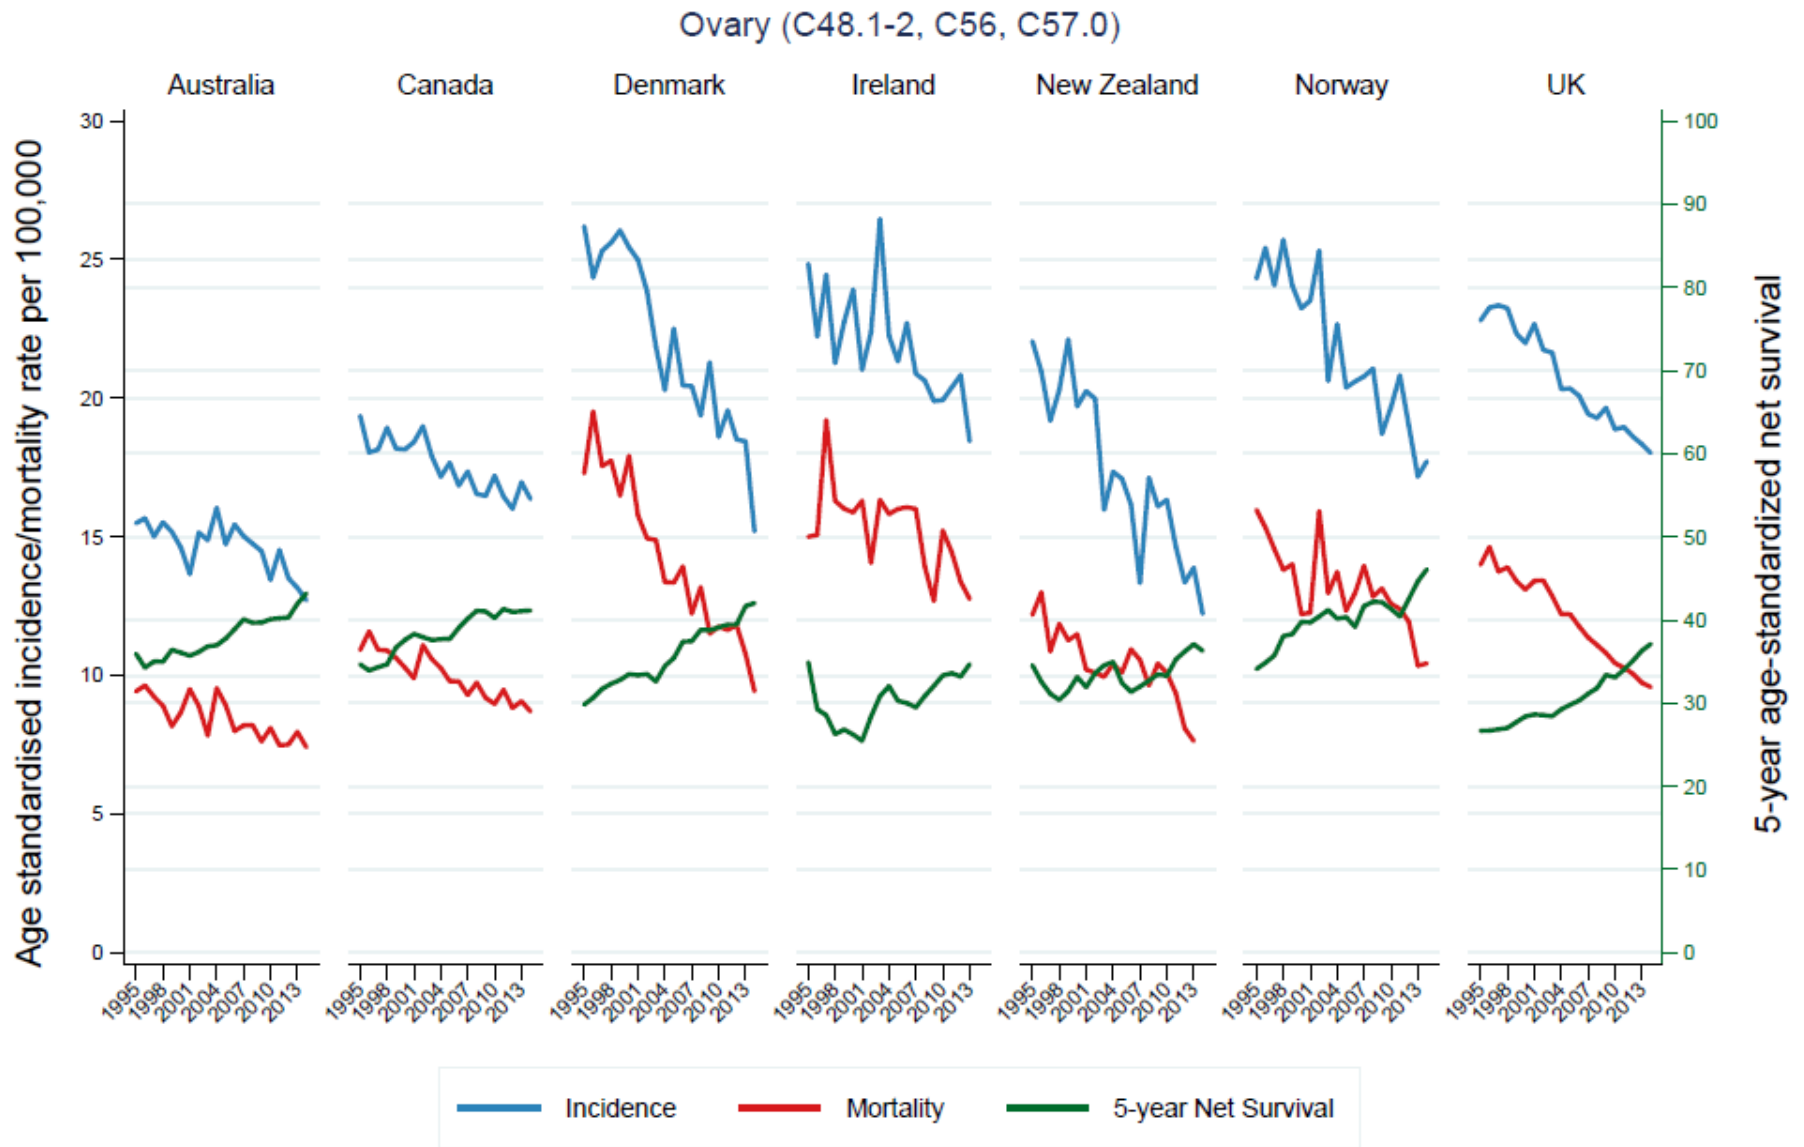

**Figure S6G. Annual trends in age-standardised incidence and mortality rates and in 5-year age-standardized net survival from ovarian cancer by country 1995-2014**

*\*Incidence and mortality data include only C56*

*Age-standardised net survival is for ages 15-99; age-standardized incidence and mortality rates are for ages 25+*
